# Supplementary material for: Genome-Wide Study of Structural Variants in Bovine Holstein, Montbéliarde and Normande Dairy Breeds
Source: PLoS One. 2015 Aug 28;10(8):e0135931. doi: 10.1371/journal.pone.0135931 (PMC4552564; doi:10.1371/journal.pone.0135931)
Supplement: S3 Table — List of all 6,426 putative large SVs identified by Pindel. (XLSX) [file pone.0135931.s003.xlsx]

## Sheet: sheet1
S3 Table: List of all 6,426 putative SVs identified by Pindel
SV num	SV code	SV type	SV length	SV BTA	SV start	SV end	Nb Breed	Nb samples	Nb Holstein	Nb Montbeliarde	Nb Normande
1	INRA_BovSV1	inversion	3,188	Chr1	93,327,773	93,330,962	1	1	1	0	0
2	INRA_BovSV2	inversion	2,224,615	Chr1	92,415,914	94,640,530	1	3	3	0	0
3	INRA_BovSV3	deletion	2,731	Chr21	48,021,832	48,024,564	1	2	2	0	0
4	INRA_BovSV4	inversion	3,849	Chr1	94,725,017	94,728,857	1	1	0	1	0
5	INRA_BovSV5	Tandem duplication	9,527	Chr15	46,673,115	46,682,643	2	8	1	0	7
6	INRA_BovSV6	inversion	6,829	Chr1	91,573,733	91,580,563	1	1	0	0	1
7	INRA_BovSV7	Tandem duplication	9,514	Chr15	46,673,128	46,682,643	1	1	1	0	0
8	INRA_BovSV8	deletion	86	Chr21	50,051,225	50,051,312	1	1	0	0	1
9	INRA_BovSV9	inversion	1,202,101	Chr10	93,932,462	95,134,564	1	1	0	0	1
10	INRA_BovSV10	Tandem duplication	138,072	Chr15	46,770,673	46,908,746	1	1	0	0	1
11	INRA_BovSV11	deletion	1,949	Chr21	53,021,449	53,023,399	1	1	0	0	1
12	INRA_BovSV12	inversion	3,829	Chr1	97,551,393	97,555,223	1	1	0	1	0
13	INRA_BovSV13	Tandem duplication	138,051	Chr15	46,771,869	46,909,921	1	1	0	0	1
14	INRA_BovSV14	inversion	2,153	Chr1	97,700,970	97,703,124	1	1	1	0	0
15	INRA_BovSV15	inversion	8,146	Chr1	98,616,679	98,624,826	2	4	3	0	1
16	INRA_BovSV16	deletion	168,692	Chr21	54,238,793	54,407,486	1	3	3	0	0
17	INRA_BovSV17	inversion	2,505	Chr1	98,725,638	98,728,144	1	1	0	0	1
18	INRA_BovSV18	inversion	1,085	Chr1	98,007,002	98,008,088	1	2	0	2	0
19	INRA_BovSV19	Tandem duplication	144,378	Chr15	46,790,868	46,935,247	3	7	3	3	1
20	INRA_BovSV20	Tandem duplication	144,304	Chr15	46,795,057	46,939,362	1	1	0	0	1
21	INRA_BovSV21	deletion	87	Chr21	55,485,540	55,485,628	1	1	0	0	1
22	INRA_BovSV22	inversion	7,760	Chr1	101,173,325	101,181,086	1	1	1	0	0
23	INRA_BovSV23	inversion	804	Chr1	101,560,504	101,561,309	1	1	0	1	0
24	INRA_BovSV24	inversion	1,303	Chr1	101,691,184	101,692,488	1	1	0	0	1
25	INRA_BovSV25	deletion	170	Chr11	13,296,330	13,296,501	3	12	3	4	5
26	INRA_BovSV26	deletion	80	Chr21	59,261,864	59,261,945	3	4	1	1	2
27	INRA_BovSV27	Tandem duplication	131,000	Chr15	46,829,749	46,960,750	3	16	7	4	5
28	INRA_BovSV28	inversion	2,822	Chr1	103,196,627	103,199,450	1	1	1	0	0
29	INRA_BovSV29	deletion	72	Chr11	13,598,925	13,598,998	2	12	9	3	0
30	INRA_BovSV30	deletion	7,981	Chr21	57,934,731	57,942,713	1	1	0	1	0
31	INRA_BovSV31	deletion	104	Chr21	60,041,420	60,041,525	1	1	0	1	0
32	INRA_BovSV32	inversion	2,528	Chr1	104,614,283	104,616,812	1	2	0	2	0
33	INRA_BovSV33	deletion	51	Chr11	13,847,175	13,847,227	1	1	0	0	1
34	INRA_BovSV34	deletion	728,832	Chr21	60,954,065	61,682,898	2	4	0	1	3
35	INRA_BovSV35	Tandem duplication	124,001	Chr15	46,858,275	46,982,277	1	1	0	0	1
36	INRA_BovSV36	inversion	2,920	Chr1	101,432,461	101,435,382	1	1	1	0	0
37	INRA_BovSV37	inversion	2,908	Chr1	101,432,473	101,435,382	1	1	1	0	0
38	INRA_BovSV38	inversion	8,074	Chr1	101,976,199	101,984,274	1	1	1	0	0
39	INRA_BovSV39	inversion	2,797	Chr1	103,196,645	103,199,443	1	1	1	0	0
40	INRA_BovSV40	deletion	45,327	Chr11	14,239,523	14,284,851	3	4	2	1	1
41	INRA_BovSV41	deletion	45,326	Chr11	14,239,524	14,284,851	2	3	2	0	1
42	INRA_BovSV42	Tandem duplication	21,770	Chr15	46,861,975	46,883,746	1	1	1	0	0
43	INRA_BovSV43	deletion	74	Chr21	67,153,291	67,153,366	2	3	0	2	1
44	INRA_BovSV44	inversion	2,007	Chr1	107,630,678	107,632,686	1	1	1	0	0
45	INRA_BovSV45	inversion	1,914	Chr1	108,780,996	108,782,911	1	1	1	0	0
46	INRA_BovSV46	inversion	4,131	Chr1	108,846,639	108,850,771	1	1	0	0	1
47	INRA_BovSV47	deletion	84	Chr21	69,921,189	69,921,274	1	1	0	0	1
48	INRA_BovSV48	Tandem duplication	437,366	Chr10	23,861,389	24,298,756	1	1	0	0	1
49	INRA_BovSV49	deletion	78	Chr21	66,889,977	66,890,056	1	1	0	0	1
50	INRA_BovSV50	deletion	8,320	Chr21	69,423,907	69,432,228	1	1	0	0	1
51	INRA_BovSV51	inversion	23,527	Chr1	105,686,221	105,709,749	1	1	0	1	0
52	INRA_BovSV52	deletion	69	Chr21	70,106,949	70,107,019	3	4	2	1	1
53	INRA_BovSV53	deletion	100	Chr21	70,398,952	70,399,053	3	11	6	2	3
54	INRA_BovSV54	deletion	84	Chr21	70,561,382	70,561,467	1	1	1	0	0
55	INRA_BovSV55	deletion	143	Chr21	70,671,541	70,671,685	2	2	1	0	1
56	INRA_BovSV56	deletion	64	Chr21	70,763,212	70,763,277	1	1	1	0	0
57	INRA_BovSV57	deletion	66	Chr21	70,780,587	70,780,654	2	6	4	2	0
58	INRA_BovSV58	deletion	114	Chr21	71,225,468	71,225,583	1	1	1	0	0
59	INRA_BovSV59	inversion	1,135	Chr1	109,521,237	109,522,373	1	2	2	0	0
60	INRA_BovSV60	deletion	172	Chr22	894,002	894,175	2	10	9	1	0
61	INRA_BovSV61	inversion	1,041	Chr1	110,246,005	110,247,047	1	1	1	0	0
62	INRA_BovSV62	deletion	6,364	Chr22	1,692,184	1,698,549	2	3	0	2	1
63	INRA_BovSV63	inversion	1,513	Chr1	111,779,907	111,781,393	1	1	0	1	0
64	INRA_BovSV64	inversion	1,862	Chr1	114,517,727	114,519,590	1	2	2	0	0
65	INRA_BovSV65	inversion	16,590	Chr1	110,431,340	110,447,931	1	1	0	0	1
66	INRA_BovSV66	inversion	78,089	Chr10	100,862,143	100,940,209	3	3	1	1	1
67	INRA_BovSV67	inversion	7,304	Chr1	112,255,137	112,262,442	2	2	1	1	0
68	INRA_BovSV68	Tandem duplication	54,225	Chr15	48,416,647	48,470,873	2	2	1	1	0
69	INRA_BovSV69	deletion	76,810	Chr22	6,425,112	6,501,923	2	2	0	1	1
70	INRA_BovSV70	Tandem duplication	54,224	Chr15	48,417,724	48,471,949	1	1	1	0	0
71	INRA_BovSV71	inversion	1,675	Chr1	115,228,163	115,229,839	1	1	1	0	0
72	INRA_BovSV72	deletion	71	Chr22	9,214,339	9,214,411	1	1	0	0	1
73	INRA_BovSV73	inversion	3,302	Chr1	117,000,025	117,003,326	1	1	1	0	0
74	INRA_BovSV74	inversion	488,958	Chr10	101,889,592	102,378,551	1	2	0	2	0
75	INRA_BovSV75	Tandem duplication	51,688	Chr15	48,426,836	48,478,525	1	1	1	0	0
76	INRA_BovSV76	inversion	5,037	Chr1	119,358,631	119,363,669	1	1	0	0	1
77	INRA_BovSV77	Tandem duplication	43,696	Chr15	48,450,108	48,493,805	1	1	0	1	0
78	INRA_BovSV78	Tandem duplication	3,560	Chr15	48,588,074	48,591,635	1	2	2	0	0
79	INRA_BovSV79	deletion	167	Chr22	15,229,157	15,229,325	1	3	0	0	3
80	INRA_BovSV80	deletion	11,884	Chr22	16,407,558	16,419,443	1	1	1	0	0
81	INRA_BovSV81	deletion	58	Chr22	16,469,603	16,469,662	1	2	2	0	0
82	INRA_BovSV82	deletion	2,450	Chr10	11,736,586	11,739,037	3	13	7	1	5
83	INRA_BovSV83	deletion	77	Chr22	18,286,894	18,286,972	2	4	2	2	0
84	INRA_BovSV84	deletion	239	Chr22	19,535,086	19,535,326	1	1	0	0	1
85	INRA_BovSV85	deletion	94	Chr11	16,087,935	16,088,030	1	1	0	0	1
86	INRA_BovSV86	inversion	29,151	Chr1	124,017,114	124,046,228	1	1	1	0	0
87	INRA_BovSV87	Tandem duplication	66,852	Chr15	49,422,889	49,489,742	1	1	0	1	0
88	INRA_BovSV88	inversion	5,336	Chr1	120,720,882	120,726,219	1	1	1	0	0
89	INRA_BovSV89	inversion	5,104	Chr1	121,179,200	121,184,305	2	3	0	1	2
90	INRA_BovSV90	inversion	1,236	Chr1	122,315,291	122,316,528	1	1	1	0	0
91	INRA_BovSV91	Tandem duplication	66,649	Chr15	49,428,024	49,494,674	1	1	0	1	0
92	INRA_BovSV92	inversion	5,412	Chr1	122,968,647	122,974,060	1	1	0	0	1
93	INRA_BovSV93	inversion	3,740	Chr1	126,234,219	126,237,960	1	1	0	1	0
94	INRA_BovSV94	Tandem duplication	106,114	Chr15	49,514,203	49,620,318	1	1	0	1	0
95	INRA_BovSV95	inversion	953	Chr1	127,014,102	127,015,034	1	1	1	0	0
96	INRA_BovSV96	inversion	1,817	Chr1	129,533,771	129,535,589	1	1	0	1	0
97	INRA_BovSV97	deletion	66	Chr22	26,444,321	26,444,388	1	1	1	0	0
98	INRA_BovSV98	deletion	1,585	Chr11	17,276,602	17,278,188	3	3	1	1	1
99	INRA_BovSV99	inversion	722	Chr1	128,112,623	128,113,346	1	1	0	0	1
100	INRA_BovSV100	deletion	199,110	Chr22	27,764,077	27,963,188	3	8	3	2	3
101	INRA_BovSV101	inversion	2,073	Chr1	128,939,299	128,941,373	1	1	0	1	0
102	INRA_BovSV102	deletion	93	Chr22	27,024,679	27,024,773	3	3	1	1	1
103	INRA_BovSV103	inversion	2,255	Chr11	85,374	87,604	2	2	1	0	1
104	INRA_BovSV104	Tandem duplication	103,899	Chr15	49,534,313	49,638,213	3	7	1	4	2
105	INRA_BovSV105	inversion	21,216	Chr1	130,799,091	130,820,302	1	1	1	0	0
106	INRA_BovSV106	deletion	60,738	Chr22	30,225,575	30,286,314	1	1	1	0	0
107	INRA_BovSV107	inversion	1,739	Chr1	131,420,405	131,422,145	1	1	1	0	0
108	INRA_BovSV108	Tandem duplication	105,654	Chr15	49,542,378	49,648,033	1	1	0	0	1
109	INRA_BovSV109	Tandem duplication	844,956	Chr10	24,017,703	24,862,660	3	3	1	1	1
110	INRA_BovSV110	inversion	93,489	Chr1	133,292,051	133,385,537	1	1	0	0	1
111	INRA_BovSV111	inversion	6,129	Chr1	134,831,328	134,837,416	1	1	1	0	0
112	INRA_BovSV112	deletion	86	Chr22	34,894,515	34,894,602	1	1	1	0	0
113	INRA_BovSV113	deletion	135	Chr22	34,947,118	34,947,254	1	1	0	0	1
114	INRA_BovSV114	inversion	564	Chr1	131,179,584	131,180,149	1	1	1	0	0
115	INRA_BovSV115	inversion	1,758	Chr1	131,420,387	131,422,146	1	1	1	0	0
116	INRA_BovSV116	Tandem duplication	103,254	Chr15	49,584,955	49,688,210	3	5	1	2	2
117	INRA_BovSV117	inversion	2,006	Chr1	137,017,132	137,019,139	1	1	0	1	0
118	INRA_BovSV118	inversion	1,390	Chr1	137,527,258	137,528,603	1	1	1	0	0
119	INRA_BovSV119	Tandem duplication	57,353	Chr15	49,866,150	49,923,504	1	1	0	0	1
120	INRA_BovSV120	inversion	60,041	Chr11	1,404,808	1,464,850	2	3	2	0	1
121	INRA_BovSV121	Tandem duplication	57,357	Chr15	49,866,150	49,923,508	1	1	0	1	0
122	INRA_BovSV122	deletion	70	Chr22	38,870,078	38,870,149	2	7	5	0	2
123	INRA_BovSV123	inversion	19,362	Chr1	139,713,832	139,733,195	1	1	0	1	0
124	INRA_BovSV124	inversion	11,845	Chr1	136,780,670	136,792,516	1	1	0	0	1
125	INRA_BovSV125	inversion	824	Chr1	139,712,980	139,713,805	1	1	0	0	1
126	INRA_BovSV126	inversion	19,381	Chr1	139,713,810	139,733,192	1	1	1	0	0
127	INRA_BovSV127	Tandem duplication	314,963	Chr15	50,060,062	50,375,026	1	1	0	1	0
128	INRA_BovSV128	inversion	3,187	Chr1	140,167,492	140,170,648	1	1	1	0	0
129	INRA_BovSV129	inversion	9,062	Chr11	2,455,903	2,464,966	1	1	0	0	1
130	INRA_BovSV130	inversion	552	Chr1	141,894,377	141,894,930	1	1	1	0	0
131	INRA_BovSV131	deletion	38,318	Chr22	40,578,395	40,616,714	1	1	0	0	1
132	INRA_BovSV132	Tandem duplication	465,227	Chr15	50,622,846	51,088,074	1	1	1	0	0
133	INRA_BovSV133	inversion	1,262	Chr1	148,273,163	148,274,426	2	2	1	1	0
134	INRA_BovSV134	inversion	1,876	Chr1	148,323,749	148,325,626	1	1	1	0	0
135	INRA_BovSV135	deletion	143	Chr22	49,237,596	49,237,740	1	1	1	0	0
136	INRA_BovSV136	Tandem duplication	68,415	Chr15	50,691,045	50,759,461	2	2	1	0	1
137	INRA_BovSV137	inversion	3,129	Chr1	146,744,529	146,747,659	1	1	0	0	1
138	INRA_BovSV138	inversion	6,873	Chr1	150,122,237	150,129,111	1	1	0	1	0
139	INRA_BovSV139	deletion	28,651	Chr22	53,293,399	53,322,051	1	1	1	0	0
140	INRA_BovSV140	deletion	2,478	Chr22	54,456,974	54,459,453	1	1	0	1	0
141	INRA_BovSV141	deletion	59	Chr22	55,705,540	55,705,600	1	2	0	0	2
142	INRA_BovSV142	deletion	70	Chr22	56,677,949	56,678,020	1	6	6	0	0
143	INRA_BovSV143	inversion	2,444	Chr1	153,976,068	153,978,513	1	1	0	1	0
144	INRA_BovSV144	inversion	146,070	Chr1	154,084,278	154,230,347	1	1	1	0	0
145	INRA_BovSV145	deletion	76	Chr22	57,313,387	57,313,464	1	2	2	0	0
146	INRA_BovSV146	Tandem duplication	27,697	Chr15	50,785,823	50,813,521	1	2	0	0	2
147	INRA_BovSV147	deletion	53	Chr22	58,207,706	58,207,760	1	1	0	1	0
148	INRA_BovSV148	deletion	65	Chr22	59,159,452	59,159,518	1	1	1	0	0
149	INRA_BovSV149	deletion	60	Chr22	59,185,947	59,186,008	1	1	1	0	0
150	INRA_BovSV150	deletion	78	Chr22	59,246,231	59,246,310	2	10	8	2	0
151	INRA_BovSV151	deletion	88	Chr22	59,491,251	59,491,340	1	1	1	0	0
152	INRA_BovSV152	inversion	987	Chr1	154,289,458	154,290,446	1	1	0	0	1
153	INRA_BovSV153	deletion	80	Chr22	59,992,337	59,992,418	2	2	1	1	0
154	INRA_BovSV154	inversion	2,186,965	Chr1	155,363,456	157,550,422	2	2	1	1	0
155	INRA_BovSV155	deletion	583	Chr22	61,225,446	61,226,030	1	1	1	0	0
156	INRA_BovSV156	deletion	146	Chr22	61,279,337	61,279,484	2	3	2	1	0
157	INRA_BovSV157	deletion	69	Chr22	61,333,413	61,333,483	1	1	0	0	1
158	INRA_BovSV158	deletion	90	Chr22	61,386,669	61,386,760	1	2	0	2	0
159	INRA_BovSV159	Tandem duplication	39,812	Chr15	51,660,494	51,700,307	1	1	0	1	0
160	INRA_BovSV160	deletion	162	Chr23	1,217,815	1,217,978	1	1	0	0	1
161	INRA_BovSV161	inversion	8,172	Chr1	156,859,008	156,867,181	1	1	1	0	0
162	INRA_BovSV162	inversion	4,715	Chr1	157,972,291	157,977,007	2	2	1	1	0
163	INRA_BovSV163	Tandem duplication	54,780	Chr15	51,671,610	51,726,391	1	1	0	1	0
164	INRA_BovSV164	deletion	55	Chr23	2,346,294	2,346,350	2	2	1	0	1
165	INRA_BovSV165	deletion	79	Chr23	3,298,552	3,298,632	1	2	2	0	0
166	INRA_BovSV166	deletion	1,266	Chr23	4,274,240	4,275,507	1	1	1	0	0
167	INRA_BovSV167	deletion	201	Chr11	20,728,773	20,728,975	3	32	13	8	11
168	INRA_BovSV168	deletion	139	Chr11	20,735,042	20,735,182	1	2	2	0	0
169	INRA_BovSV169	deletion	22,698	Chr23	7,084,586	7,107,285	1	1	1	0	0
170	INRA_BovSV170	inversion	51,540	Chr20	6,730,862	6,782,403	1	1	0	0	1
171	INRA_BovSV171	inversion	25,821	Chr11	3,790,011	3,815,833	1	1	1	0	0
172	INRA_BovSV172	Tandem duplication	5,994	Chr10	24,145,939	24,151,934	1	2	2	0	0
173	INRA_BovSV173	inversion	12,544	Chr20	9,440,894	9,453,439	1	1	1	0	0
174	INRA_BovSV174	inversion	5,395	Chr20	9,736,897	9,742,285	1	1	1	0	0
175	INRA_BovSV175	inversion	24,688	Chr20	6,744,454	6,769,143	1	1	0	0	1
176	INRA_BovSV176	inversion	27,305	Chr20	6,743,155	6,770,461	1	1	1	0	0
177	INRA_BovSV177	inversion	1,126	Chr20	6,756,966	6,758,093	3	5	2	1	2
178	INRA_BovSV178	deletion	60	Chr23	11,739,964	11,740,025	1	1	1	0	0
179	INRA_BovSV179	deletion	57	Chr23	11,900,700	11,900,758	1	1	0	0	1
180	INRA_BovSV180	Tandem duplication	14,138	Chr15	71,286,930	71,301,069	1	2	2	0	0
181	INRA_BovSV181	inversion	1,306	Chr20	10,318,940	10,320,247	1	1	1	0	0
182	INRA_BovSV182	inversion	867	Chr20	10,319,160	10,320,028	1	1	0	1	0
183	INRA_BovSV183	deletion	77	Chr23	17,565,067	17,565,145	1	1	0	1	0
184	INRA_BovSV184	inversion	4,396	Chr20	14,081,984	14,086,381	1	1	1	0	0
185	INRA_BovSV185	Tandem duplication	26,479	Chr10	24,148,396	24,174,876	2	2	1	0	1
186	INRA_BovSV186	deletion	312	Chr11	22,793,519	22,793,832	2	4	2	0	2
187	INRA_BovSV187	inversion	877	Chr20	16,313,868	16,314,746	1	1	0	1	0
188	INRA_BovSV188	deletion	5,666	Chr23	20,025,096	20,030,763	2	2	1	0	1
189	INRA_BovSV189	deletion	77,438	Chr10	12,814,441	12,891,880	1	1	0	0	1
190	INRA_BovSV190	inversion	881	Chr20	18,471,950	18,472,832	2	4	3	1	0
191	INRA_BovSV191	Tandem duplication	27,570	Chr15	79,423,791	79,451,362	3	14	5	3	6
192	INRA_BovSV192	deletion	893	Chr11	23,220,897	23,221,791	1	1	0	1	0
193	INRA_BovSV193	deletion	126	Chr23	23,575,449	23,575,576	1	1	1	0	0
194	INRA_BovSV194	inversion	845	Chr20	20,628,546	20,629,392	1	1	0	0	1
195	INRA_BovSV195	deletion	21,789	Chr23	24,865,402	24,887,192	3	12	6	5	1
196	INRA_BovSV196	inversion	2,003	Chr20	21,669,884	21,671,888	2	3	0	2	1
197	INRA_BovSV197	Tandem duplication	384,519	Chr15	80,302,645	80,687,165	1	1	0	0	1
198	INRA_BovSV198	deletion	21,790	Chr23	24,865,412	24,887,203	1	3	0	3	0
199	INRA_BovSV199	deletion	21,790	Chr23	24,865,422	24,887,213	1	2	2	0	0
200	INRA_BovSV200	deletion	349,041	Chr23	25,626,221	25,975,263	1	1	0	0	1
201	INRA_BovSV201	deletion	348,915	Chr23	25,631,866	25,980,782	1	1	1	0	0
202	INRA_BovSV202	deletion	60,933	Chr23	25,715,099	25,776,033	1	1	1	0	0
203	INRA_BovSV203	deletion	25,645	Chr23	25,718,461	25,744,107	1	1	1	0	0
204	INRA_BovSV204	deletion	25,642	Chr23	25,721,916	25,747,559	2	2	1	0	1
205	INRA_BovSV205	deletion	468,636	Chr23	25,722,719	26,191,356	3	6	1	2	3
206	INRA_BovSV206	deletion	28,232	Chr23	25,739,703	25,767,936	2	3	0	2	1
207	INRA_BovSV207	deletion	28,228	Chr23	25,739,707	25,767,936	2	5	2	3	0
208	INRA_BovSV208	deletion	35,926	Chr23	25,747,130	25,783,057	1	1	0	1	0
209	INRA_BovSV209	deletion	544,028	Chr23	25,812,456	26,356,485	2	5	3	0	2
210	INRA_BovSV210	deletion	199,124	Chr23	25,833,489	26,032,614	2	2	1	0	1
211	INRA_BovSV211	deletion	252,598	Chr23	25,881,650	26,134,249	1	3	3	0	0
212	INRA_BovSV212	deletion	77,769	Chr23	25,882,823	25,960,593	2	4	3	0	1
213	INRA_BovSV213	deletion	249,358	Chr23	25,901,123	26,150,482	1	1	1	0	0
214	INRA_BovSV214	deletion	251,709	Chr23	25,905,846	26,157,556	3	14	3	9	2
215	INRA_BovSV215	deletion	122,894	Chr23	25,993,633	26,116,528	1	1	0	0	1
216	INRA_BovSV216	deletion	2,638	Chr23	26,027,729	26,030,368	1	1	0	1	0
217	INRA_BovSV217	deletion	90,408	Chr23	26,272,238	26,362,647	3	5	2	2	1
218	INRA_BovSV218	deletion	26,808	Chr23	26,486,022	26,512,831	2	4	1	3	0
219	INRA_BovSV219	deletion	26,263	Chr23	26,493,532	26,519,796	1	1	0	0	1
220	INRA_BovSV220	deletion	12,310	Chr23	26,529,122	26,541,433	1	1	1	0	0
221	INRA_BovSV221	deletion	15,639	Chr23	26,532,321	26,547,961	1	3	0	3	0
222	INRA_BovSV222	Tandem duplication	372,867	Chr15	80,481,754	80,854,622	1	1	1	0	0
223	INRA_BovSV223	deletion	1,466	Chr23	26,816,634	26,818,101	1	1	1	0	0
224	INRA_BovSV224	deletion	6,019	Chr23	26,870,613	26,876,633	3	8	4	2	2
225	INRA_BovSV225	deletion	58	Chr10	13,009,300	13,009,359	1	2	0	0	2
226	INRA_BovSV226	deletion	59	Chr23	27,790,820	27,790,880	1	1	0	1	0
227	INRA_BovSV227	deletion	67	Chr23	28,263,741	28,263,809	1	1	0	0	1
228	INRA_BovSV228	deletion	60,523	Chr23	28,322,299	28,382,823	1	1	0	1	0
229	INRA_BovSV229	deletion	60,525	Chr23	28,323,834	28,384,360	1	1	1	0	0
230	INRA_BovSV230	deletion	24,248	Chr23	28,331,312	28,355,561	2	3	2	1	0
231	INRA_BovSV231	deletion	23,196	Chr23	28,340,800	28,363,997	3	12	4	4	4
232	INRA_BovSV232	deletion	22,911	Chr23	28,345,163	28,368,075	1	1	1	0	0
233	INRA_BovSV233	deletion	22,893	Chr23	28,347,135	28,370,029	1	1	1	0	0
234	INRA_BovSV234	deletion	21,610	Chr23	28,350,814	28,372,425	2	2	0	1	1
235	INRA_BovSV235	deletion	70,645	Chr23	28,361,153	28,431,799	1	1	0	1	0
236	INRA_BovSV236	deletion	8,586	Chr23	28,528,258	28,536,845	1	2	0	0	2
237	INRA_BovSV237	deletion	57,221	Chr23	29,007,652	29,064,874	1	1	1	0	0
238	INRA_BovSV238	deletion	59,841	Chr23	29,010,677	29,070,519	1	1	0	1	0
239	INRA_BovSV239	deletion	59,837	Chr23	29,011,026	29,070,864	1	1	0	0	1
240	INRA_BovSV240	deletion	60,098	Chr23	29,020,821	29,080,920	3	4	2	1	1
241	INRA_BovSV241	deletion	60,096	Chr23	29,025,196	29,085,293	3	6	1	2	3
242	INRA_BovSV242	deletion	60,141	Chr23	29,028,465	29,088,607	1	1	1	0	0
243	INRA_BovSV243	deletion	57,871	Chr23	29,043,750	29,101,622	2	2	1	0	1
244	INRA_BovSV244	deletion	57,867	Chr23	29,045,736	29,103,604	1	2	2	0	0
245	INRA_BovSV245	deletion	57,555	Chr23	29,047,635	29,105,191	2	2	1	0	1
246	INRA_BovSV246	deletion	57,548	Chr23	29,048,558	29,106,107	1	1	0	0	1
247	INRA_BovSV247	deletion	57,529	Chr23	29,050,457	29,107,987	2	3	1	0	2
248	INRA_BovSV248	deletion	57,537	Chr23	29,051,847	29,109,385	1	1	0	0	1
249	INRA_BovSV249	deletion	17,059	Chr23	29,062,784	29,079,844	2	5	2	3	0
250	INRA_BovSV250	deletion	12,898	Chr23	29,084,579	29,097,478	1	1	1	0	0
251	INRA_BovSV251	Tandem duplication	377,428	Chr15	80,511,937	80,889,366	2	2	1	0	1
252	INRA_BovSV252	deletion	9,895	Chr23	29,158,370	29,168,266	1	1	0	1	0
253	INRA_BovSV253	deletion	12,288	Chr23	29,269,599	29,281,888	1	1	0	0	1
254	INRA_BovSV254	deletion	12,336	Chr23	29,271,429	29,283,766	2	3	2	1	0
255	INRA_BovSV255	deletion	9,292	Chr23	29,278,844	29,288,137	2	4	0	3	1
256	INRA_BovSV256	deletion	9,290	Chr23	29,278,845	29,288,136	1	1	0	0	1
257	INRA_BovSV257	deletion	9,709	Chr23	29,278,998	29,288,708	1	1	1	0	0
258	INRA_BovSV258	deletion	11,081	Chr23	29,288,131	29,299,213	2	2	1	0	1
259	INRA_BovSV259	deletion	63,833	Chr23	29,391,311	29,455,145	1	1	0	0	1
260	INRA_BovSV260	deletion	79	Chr23	29,643,201	29,643,281	1	2	0	0	2
261	INRA_BovSV261	deletion	49,778	Chr23	29,757,815	29,807,594	2	3	0	1	2
262	INRA_BovSV262	deletion	20,143	Chr23	29,762,721	29,782,865	1	2	0	0	2
263	INRA_BovSV263	deletion	20,145	Chr23	29,763,845	29,783,991	3	5	1	1	3
264	INRA_BovSV264	deletion	20,145	Chr23	29,763,918	29,784,064	1	1	1	0	0
265	INRA_BovSV265	deletion	21,406	Chr23	29,766,914	29,788,321	3	19	11	5	3
266	INRA_BovSV266	deletion	21,387	Chr23	29,770,016	29,791,404	3	27	15	3	9
267	INRA_BovSV267	deletion	26,535	Chr23	29,775,666	29,802,202	3	6	3	1	2
268	INRA_BovSV268	deletion	26,542	Chr23	29,776,424	29,802,967	1	3	3	0	0
269	INRA_BovSV269	deletion	45,224	Chr23	25,330,083	25,375,308	1	1	1	0	0
270	INRA_BovSV270	Tandem duplication	377,189	Chr15	80,530,627	80,907,817	1	3	3	0	0
271	INRA_BovSV271	deletion	348,921	Chr23	25,631,860	25,980,782	1	1	0	0	1
272	INRA_BovSV272	deletion	25,630	Chr23	25,717,703	25,743,334	1	1	0	0	1
273	INRA_BovSV273	deletion	25,748	Chr23	25,727,823	25,753,572	1	1	0	0	1
274	INRA_BovSV274	deletion	443,247	Chr23	25,747,132	26,190,380	1	1	1	0	0
275	INRA_BovSV275	deletion	193,994	Chr23	25,823,213	26,017,208	1	1	1	0	0
276	INRA_BovSV276	deletion	77,767	Chr23	25,882,941	25,960,709	1	1	0	1	0
277	INRA_BovSV277	deletion	611,899	Chr23	25,918,811	26,530,711	1	1	0	1	0
278	INRA_BovSV278	deletion	137,254	Chr23	25,945,163	26,082,418	1	2	2	0	0
279	INRA_BovSV279	deletion	6,739	Chr23	26,374,483	26,381,223	1	1	1	0	0
280	INRA_BovSV280	deletion	26,277	Chr23	26,493,298	26,519,576	1	1	0	0	1
281	INRA_BovSV281	deletion	162,677	Chr23	26,498,700	26,661,378	1	1	1	0	0
282	INRA_BovSV282	deletion	162,656	Chr23	26,500,098	26,662,755	1	2	0	2	0
283	INRA_BovSV283	inversion	4,612	Chr20	33,306,911	33,311,524	1	1	0	0	1
284	INRA_BovSV284	deletion	93,562	Chr23	28,337,688	28,431,251	1	1	0	1	0
285	INRA_BovSV285	deletion	172,195	Chr23	28,340,819	28,513,015	1	1	0	1	0
286	INRA_BovSV286	deletion	23,197	Chr23	28,340,825	28,364,023	1	2	2	0	0
287	INRA_BovSV287	deletion	115,063	Chr23	28,355,292	28,470,356	1	1	0	1	0
288	INRA_BovSV288	deletion	126,054	Chr23	28,378,177	28,504,232	1	1	0	0	1
289	INRA_BovSV289	deletion	74,625	Chr23	28,483,206	28,557,832	1	1	1	0	0
290	INRA_BovSV290	deletion	8,609	Chr23	28,525,023	28,533,633	1	1	0	0	1
291	INRA_BovSV291	Tandem duplication	380,343	Chr15	80,540,838	80,921,182	1	1	1	0	0
292	INRA_BovSV292	deletion	57,795	Chr23	29,041,525	29,099,321	1	1	0	0	1
293	INRA_BovSV293	deletion	57,900	Chr23	29,044,062	29,101,963	1	1	0	0	1
294	INRA_BovSV294	deletion	57,866	Chr23	29,045,744	29,103,611	1	2	0	0	2
295	INRA_BovSV295	deletion	57,576	Chr23	29,047,589	29,105,166	1	1	0	0	1
296	INRA_BovSV296	deletion	57,562	Chr23	29,047,790	29,105,353	1	1	1	0	0
297	INRA_BovSV297	deletion	60,664	Chr23	29,053,306	29,113,971	1	1	0	0	1
298	INRA_BovSV298	inversion	1,674	Chr20	30,689,539	30,691,214	1	1	1	0	0
299	INRA_BovSV299	deletion	9,898	Chr23	29,157,503	29,167,402	1	1	1	0	0
300	INRA_BovSV300	inversion	12,290	Chr20	31,633,727	31,646,018	1	1	1	0	0
301	INRA_BovSV301	deletion	153,322	Chr23	29,267,212	29,420,535	1	1	0	0	1
302	INRA_BovSV302	deletion	46,907	Chr23	29,360,510	29,407,418	2	3	2	0	1
303	INRA_BovSV303	deletion	65,001	Chr23	29,383,541	29,448,543	2	2	1	0	1
304	INRA_BovSV304	deletion	21,420	Chr23	29,766,900	29,788,321	1	2	0	0	2
305	INRA_BovSV305	deletion	21,393	Chr23	29,769,429	29,790,823	1	1	1	0	0
306	INRA_BovSV306	deletion	21,392	Chr23	29,769,430	29,790,823	1	1	1	0	0
307	INRA_BovSV307	deletion	37,013	Chr23	29,793,504	29,830,518	1	1	1	0	0
308	INRA_BovSV308	deletion	82,676	Chr23	30,359,168	30,441,845	2	3	1	2	0
309	INRA_BovSV309	deletion	6,352	Chr23	30,362,394	30,368,747	1	1	0	0	1
310	INRA_BovSV310	deletion	82,143	Chr23	30,363,279	30,445,423	2	3	2	0	1
311	INRA_BovSV311	deletion	128,898	Chr23	30,377,229	30,506,128	1	1	0	0	1
312	INRA_BovSV312	deletion	45,704	Chr23	30,448,414	30,494,119	2	5	0	4	1
313	INRA_BovSV313	Tandem duplication	20,314	Chr10	24,152,210	24,172,525	1	1	1	0	0
314	INRA_BovSV314	deletion	2,930	Chr23	30,826,029	30,828,960	1	3	3	0	0
315	INRA_BovSV315	inversion	1,873	Chr20	36,867,549	36,869,423	1	1	0	1	0
316	INRA_BovSV316	Tandem duplication	379,248	Chr15	80,554,289	80,933,538	1	1	1	0	0
317	INRA_BovSV317	deletion	144	Chr23	31,968,154	31,968,299	1	1	1	0	0
318	INRA_BovSV318	inversion	12,237	Chr20	38,036,656	38,048,872	1	1	1	0	0
319	INRA_BovSV319	Tandem duplication	394,823	Chr15	80,567,673	80,962,497	1	1	0	0	1
320	INRA_BovSV320	deletion	500,236	Chr23	34,341,133	34,841,370	2	5	4	0	1
321	INRA_BovSV321	deletion	29,014	Chr23	34,345,001	34,374,016	1	1	1	0	0
322	INRA_BovSV322	deletion	1,876	Chr23	34,462,353	34,464,230	1	2	0	0	2
323	INRA_BovSV323	deletion	51,463	Chr23	34,490,665	34,542,129	1	1	1	0	0
324	INRA_BovSV324	deletion	32,820	Chr23	34,633,091	34,665,912	1	2	0	0	2
325	INRA_BovSV325	deletion	32,679	Chr23	34,638,659	34,671,339	2	4	0	2	2
326	INRA_BovSV326	deletion	109,633	Chr23	34,642,786	34,752,420	3	9	6	2	1
327	INRA_BovSV327	deletion	25,435	Chr23	34,655,719	34,681,155	2	3	2	0	1
328	INRA_BovSV328	deletion	50,376	Chr23	34,784,890	34,835,267	1	1	1	0	0
329	INRA_BovSV329	deletion	52,602	Chr23	34,830,720	34,883,323	1	1	1	0	0
330	INRA_BovSV330	deletion	12,901	Chr23	30,471,095	30,483,997	1	1	0	1	0
331	INRA_BovSV331	deletion	87,038	Chr23	30,566,932	30,653,971	1	1	1	0	0
332	INRA_BovSV332	deletion	30,200	Chr23	34,366,542	34,396,743	2	5	4	1	0
333	INRA_BovSV333	Tandem duplication	50,168	Chr15	81,867,502	81,917,671	2	2	1	0	1
334	INRA_BovSV334	deletion	63	Chr23	35,206,895	35,206,959	1	1	0	1	0
335	INRA_BovSV335	inversion	3,443	Chr20	42,616,024	42,619,458	1	1	1	0	0
336	INRA_BovSV336	deletion	143	Chr23	35,605,316	35,605,460	2	7	3	0	4
337	INRA_BovSV337	inversion	2,773	Chr20	43,994,125	43,996,899	1	1	1	0	0
338	INRA_BovSV338	inversion	7,564	Chr20	44,391,357	44,398,922	1	1	0	1	0
339	INRA_BovSV339	deletion	142	Chr23	38,903,018	38,903,161	1	1	0	0	1
340	INRA_BovSV340	deletion	127	Chr23	39,244,310	39,244,438	1	1	1	0	0
341	INRA_BovSV341	inversion	4,343	Chr20	44,994,013	44,998,357	1	1	1	0	0
342	INRA_BovSV342	inversion	19,510	Chr20	43,744,352	43,763,863	1	1	0	0	1
343	INRA_BovSV343	Tandem duplication	191	Chr15	83,310,320	83,310,512	2	3	0	1	2
344	INRA_BovSV344	deletion	75	Chr23	38,536,119	38,536,195	2	2	1	1	0
345	INRA_BovSV345	deletion	61	Chr23	42,353,957	42,354,019	1	2	0	2	0
346	INRA_BovSV346	inversion	1,663	Chr20	46,278,451	46,280,115	2	2	1	0	1
347	INRA_BovSV347	deletion	3,098	Chr23	44,105,019	44,108,118	2	2	1	1	0
348	INRA_BovSV348	deletion	298	Chr23	44,272,480	44,272,779	1	1	0	1	0
349	INRA_BovSV349	inversion	2,683	Chr20	47,497,927	47,500,569	1	1	1	0	0
350	INRA_BovSV350	inversion	3,030	Chr20	47,659,727	47,662,734	2	2	1	0	1
351	INRA_BovSV351	inversion	44,822	Chr20	47,952,778	47,997,601	1	2	0	0	2
352	INRA_BovSV352	deletion	73	Chr23	45,263,471	45,263,545	1	1	0	0	1
353	INRA_BovSV353	inversion	1,397	Chr20	48,422,236	48,423,634	1	1	1	0	0
354	INRA_BovSV354	deletion	80	Chr23	47,612,359	47,612,440	1	1	0	1	0
355	INRA_BovSV355	deletion	61	Chr23	48,208,310	48,208,372	1	1	0	0	1
356	INRA_BovSV356	deletion	66	Chr23	48,254,440	48,254,507	1	2	2	0	0
357	INRA_BovSV357	deletion	88	Chr23	48,319,838	48,319,927	3	5	2	2	1
358	INRA_BovSV358	deletion	58	Chr23	48,517,930	48,517,989	1	3	0	3	0
359	INRA_BovSV359	deletion	60	Chr23	48,613,619	48,613,680	3	12	2	4	6
360	INRA_BovSV360	deletion	119	Chr23	48,628,756	48,628,876	2	2	1	0	1
361	INRA_BovSV361	deletion	78	Chr23	48,851,073	48,851,152	1	1	0	1	0
362	INRA_BovSV362	deletion	51	Chr23	49,068,544	49,068,596	1	1	1	0	0
363	INRA_BovSV363	deletion	67	Chr23	49,130,626	49,130,694	2	4	0	3	1
364	INRA_BovSV364	deletion	115	Chr23	49,160,251	49,160,367	1	1	1	0	0
365	INRA_BovSV365	deletion	134	Chr23	49,397,684	49,397,819	2	5	2	3	0
366	INRA_BovSV366	inversion	2,739	Chr11	8,236,360	8,239,100	1	1	1	0	0
367	INRA_BovSV367	inversion	2,497	Chr20	47,589,358	47,591,856	1	2	2	0	0
368	INRA_BovSV368	deletion	57	Chr23	50,218,177	50,218,235	1	1	1	0	0
369	INRA_BovSV369	deletion	52	Chr23	50,462,816	50,462,869	1	1	1	0	0
370	INRA_BovSV370	deletion	110	Chr23	51,011,859	51,011,970	1	1	0	1	0
371	INRA_BovSV371	deletion	55	Chr23	51,026,103	51,026,159	2	2	1	1	0
372	INRA_BovSV372	deletion	143	Chr23	51,242,345	51,242,489	1	1	1	0	0
373	INRA_BovSV373	deletion	126	Chr23	51,319,308	51,319,435	1	1	1	0	0
374	INRA_BovSV374	deletion	128	Chr23	51,413,835	51,413,964	1	1	0	1	0
375	INRA_BovSV375	deletion	56	Chr23	51,435,288	51,435,345	1	1	0	0	1
376	INRA_BovSV376	deletion	113	Chr23	51,574,766	51,574,880	1	1	0	0	1
377	INRA_BovSV377	deletion	66	Chr23	51,747,847	51,747,914	1	1	1	0	0
378	INRA_BovSV378	deletion	65	Chr23	51,747,897	51,747,963	1	1	0	0	1
379	INRA_BovSV379	inversion	924	Chr20	50,339,532	50,340,457	1	1	0	0	1
380	INRA_BovSV380	Tandem duplication	3,111	Chr16	3,874	6,986	3	5	1	1	3
381	INRA_BovSV381	deletion	6,187	Chr23	50,627,171	50,633,359	1	1	0	1	0
382	INRA_BovSV382	inversion	3,508	Chr20	51,963,364	51,966,873	1	1	1	0	0
383	INRA_BovSV383	deletion	110	Chr24	1,605,478	1,605,589	1	1	0	1	0
384	INRA_BovSV384	inversion	1,692	Chr20	52,349,031	52,350,684	1	1	1	0	0
385	INRA_BovSV385	deletion	79	Chr24	1,824,744	1,824,824	1	3	0	3	0
386	INRA_BovSV386	deletion	342	Chr24	1,840,225	1,840,568	2	3	1	2	0
387	INRA_BovSV387	deletion	91	Chr24	2,494,703	2,494,795	2	2	0	1	1
388	INRA_BovSV388	deletion	69	Chr24	2,550,038	2,550,108	3	7	4	2	1
389	INRA_BovSV389	deletion	823,868	Chr24	3,670,718	4,494,587	2	3	0	1	2
390	INRA_BovSV390	deletion	70	Chr24	4,532,981	4,533,052	3	6	2	2	2
391	INRA_BovSV391	deletion	1,390	Chr24	5,104,993	5,106,384	3	5	2	2	1
392	INRA_BovSV392	inversion	904	Chr20	50,190,477	50,191,382	1	1	1	0	0
393	INRA_BovSV393	inversion	10,653	Chr20	50,406,432	50,417,086	1	1	1	0	0
394	INRA_BovSV394	Tandem duplication	6,545	Chr16	113,268	119,814	1	1	0	0	1
395	INRA_BovSV395	Tandem duplication	118,810	Chr16	4,826,803	4,945,614	1	1	1	0	0
396	INRA_BovSV396	inversion	3,269	Chr20	57,785,478	57,788,722	2	2	1	0	1
397	INRA_BovSV397	Tandem duplication	13,527	Chr16	4,889,073	4,902,601	1	1	0	0	1
398	INRA_BovSV398	inversion	690	Chr20	59,695,641	59,696,332	1	1	1	0	0
399	INRA_BovSV399	deletion	81	Chr11	29,115,048	29,115,130	2	2	0	1	1
400	INRA_BovSV400	inversion	1,072	Chr20	58,538,574	58,539,647	1	1	1	0	0
401	INRA_BovSV401	inversion	1,056	Chr20	58,538,590	58,539,647	1	1	1	0	0
402	INRA_BovSV402	inversion	1,070	Chr20	58,538,590	58,539,661	2	3	2	1	0
403	INRA_BovSV403	inversion	24,539	Chr20	59,869,526	59,894,066	1	3	3	0	0
404	INRA_BovSV404	deletion	2,278	Chr24	10,934,501	10,936,780	1	2	2	0	0
405	INRA_BovSV405	deletion	71	Chr24	11,354,059	11,354,131	2	3	0	2	1
406	INRA_BovSV406	deletion	6,530	Chr24	14,029,824	14,036,355	1	1	0	1	0
407	INRA_BovSV407	Tandem duplication	407,731	Chr16	5,547,711	5,955,443	2	4	3	1	0
408	INRA_BovSV408	inversion	2,231	Chr20	60,083,835	60,086,067	2	2	1	1	0
409	INRA_BovSV409	inversion	120	Chr11	12,198,757	12,198,878	1	1	0	0	1
410	INRA_BovSV410	Tandem duplication	271,587	Chr16	5,564,393	5,835,981	2	3	1	0	2
411	INRA_BovSV411	inversion	1,041,599	Chr20	64,353,817	65,395,393	2	2	0	1	1
412	INRA_BovSV412	Tandem duplication	271,753	Chr16	5,568,871	5,840,625	1	3	3	0	0
413	INRA_BovSV413	inversion	1,748	Chr11	12,254,668	12,256,417	1	2	2	0	0
414	INRA_BovSV414	inversion	3,244	Chr20	66,726,373	66,729,618	1	1	0	1	0
415	INRA_BovSV415	inversion	5,171	Chr20	68,701,434	68,706,606	1	2	2	0	0
416	INRA_BovSV416	deletion	478	Chr24	19,270,480	19,270,959	3	5	3	1	1
417	INRA_BovSV417	inversion	1,041,608	Chr20	64,353,805	65,395,414	1	1	1	0	0
418	INRA_BovSV418	inversion	2,364	Chr20	67,174,719	67,177,084	1	1	0	0	1
419	INRA_BovSV419	deletion	69	Chr11	28,254,030	28,254,100	2	5	3	0	2
420	INRA_BovSV420	deletion	64	Chr24	21,490,332	21,490,397	1	1	0	0	1
421	INRA_BovSV421	deletion	117	Chr24	21,514,137	21,514,255	2	2	1	1	0
422	INRA_BovSV422	inversion	1,023	Chr11	13,583,297	13,584,321	1	1	0	1	0
423	INRA_BovSV423	Tandem duplication	298,967	Chr16	5,664,692	5,963,660	1	1	1	0	0
424	INRA_BovSV424	inversion	1,279	Chr21	648,097	649,367	1	1	1	0	0
425	INRA_BovSV425	deletion	81	Chr24	24,451,688	24,451,770	1	3	3	0	0
426	INRA_BovSV426	inversion	195,532	Chr21	1,407,603	1,603,130	1	1	0	1	0
427	INRA_BovSV427	inversion	1,164	Chr11	13,924,514	13,925,679	2	2	1	1	0
428	INRA_BovSV428	deletion	463	Chr24	22,679,979	22,680,443	1	2	0	2	0
429	INRA_BovSV429	inversion	2,057	Chr21	3,248,614	3,250,672	1	1	1	0	0
430	INRA_BovSV430	deletion	78	Chr24	25,855,209	25,855,288	1	1	0	0	1
431	INRA_BovSV431	deletion	59	Chr11	30,417,055	30,417,115	1	1	0	1	0
432	INRA_BovSV432	inversion	207,426	Chr21	1,351,339	1,558,766	1	1	0	0	1
433	INRA_BovSV433	deletion	63	Chr24	28,613,105	28,613,169	1	1	0	0	1
434	INRA_BovSV434	deletion	16,074	Chr24	28,756,208	28,772,283	3	16	7	6	3
435	INRA_BovSV435	Tandem duplication	299,562	Chr16	5,670,552	5,970,115	3	3	1	1	1
436	INRA_BovSV436	Tandem duplication	113,707	Chr16	5,673,202	5,786,910	1	1	0	1	0
437	INRA_BovSV437	Tandem duplication	504,053	Chr10	24,268,303	24,772,357	1	1	0	1	0
438	INRA_BovSV438	inversion	490,609	Chr21	1,460,610	1,951,220	1	1	0	0	1
439	INRA_BovSV439	Tandem duplication	123,923	Chr16	5,676,453	5,800,377	2	3	1	0	2
440	INRA_BovSV440	inversion	2,116	Chr21	6,571,738	6,573,855	1	1	1	0	0
441	INRA_BovSV441	deletion	69	Chr24	32,725,023	32,725,093	2	4	2	0	2
442	INRA_BovSV442	Tandem duplication	299,865	Chr16	5,676,469	5,976,335	2	2	0	1	1
443	INRA_BovSV443	Tandem duplication	299,679	Chr16	5,678,573	5,978,253	1	2	0	2	0
444	INRA_BovSV444	inversion	1,454	Chr21	9,582,851	9,584,306	1	1	1	0	0
445	INRA_BovSV445	inversion	948	Chr21	9,908,757	9,909,706	1	1	1	0	0
446	INRA_BovSV446	inversion	1,822	Chr21	6,224,707	6,226,530	1	1	0	1	0
447	INRA_BovSV447	inversion	7,551	Chr21	9,056,288	9,063,840	1	1	1	0	0
448	INRA_BovSV448	inversion	7,310	Chr21	9,847,850	9,855,161	1	1	0	0	1
449	INRA_BovSV449	deletion	253	Chr24	38,261,236	38,261,490	1	1	0	0	1
450	INRA_BovSV450	deletion	61	Chr24	38,585,867	38,585,929	2	8	5	3	0
451	INRA_BovSV451	Tandem duplication	186,608	Chr16	5,697,935	5,884,544	1	2	0	2	0
452	INRA_BovSV452	inversion	4,897	Chr21	13,640,119	13,645,015	1	2	2	0	0
453	INRA_BovSV453	inversion	1,177	Chr21	12,333,451	12,334,629	1	2	2	0	0
454	INRA_BovSV454	inversion	654	Chr21	12,333,711	12,334,366	1	1	0	0	1
455	INRA_BovSV455	Tandem duplication	187,571	Chr16	5,701,299	5,888,871	1	1	0	1	0
456	INRA_BovSV456	Tandem duplication	524,210	Chr10	24,306,732	24,830,943	2	3	2	0	1
457	INRA_BovSV457	deletion	94	Chr24	41,371,544	41,371,639	1	2	0	0	2
458	INRA_BovSV458	deletion	72	Chr24	42,123,642	42,123,715	1	1	1	0	0
459	INRA_BovSV459	Tandem duplication	316,668	Chr16	5,708,321	6,024,990	1	1	0	1	0
460	INRA_BovSV460	inversion	986	Chr11	13,924,592	13,925,579	1	1	1	0	0
461	INRA_BovSV461	deletion	92	Chr24	45,424,620	45,424,713	2	3	1	2	0
462	INRA_BovSV462	inversion	686	Chr21	18,672,810	18,673,497	1	2	2	0	0
463	INRA_BovSV463	deletion	86	Chr24	48,512,023	48,512,110	1	1	0	1	0
464	INRA_BovSV464	inversion	928	Chr21	19,503,188	19,504,117	1	1	0	0	1
465	INRA_BovSV465	deletion	78	Chr24	49,838,928	49,839,007	3	10	5	3	2
466	INRA_BovSV466	inversion	76,459	Chr21	20,391,413	20,467,873	1	1	1	0	0
467	INRA_BovSV467	Tandem duplication	325,030	Chr16	5,818,885	6,143,916	2	2	1	1	0
468	INRA_BovSV468	deletion	67	Chr24	48,850,173	48,850,241	2	3	2	1	0
469	INRA_BovSV469	inversion	1,064	Chr21	22,994,771	22,995,836	1	1	0	0	1
470	INRA_BovSV470	deletion	51	Chr24	50,791,930	50,791,982	2	9	7	0	2
471	INRA_BovSV471	inversion	1,793	Chr21	22,998,651	23,000,445	1	1	0	1	0
472	INRA_BovSV472	deletion	61	Chr24	51,067,018	51,067,080	2	2	0	1	1
473	INRA_BovSV473	inversion	6,866	Chr21	23,774,111	23,780,978	1	1	0	1	0
474	INRA_BovSV474	Tandem duplication	81,982	Chr16	5,844,146	5,926,129	1	1	0	0	1
475	INRA_BovSV475	inversion	7,271,985	Chr11	9,938,196	17,210,182	1	1	1	0	0
476	INRA_BovSV476	deletion	72	Chr24	54,458,267	54,458,340	2	2	1	1	0
477	INRA_BovSV477	deletion	93	Chr24	54,790,773	54,790,867	1	1	1	0	0
478	INRA_BovSV478	Tandem duplication	113,466	Chr16	5,876,126	5,989,593	3	6	4	1	1
479	INRA_BovSV479	inversion	299,046	Chr21	20,364,533	20,663,580	1	1	1	0	0
480	INRA_BovSV480	Tandem duplication	138,454	Chr16	5,877,622	6,016,077	1	1	0	1	0
481	INRA_BovSV481	deletion	85	Chr24	55,965,725	55,965,811	1	1	0	0	1
482	INRA_BovSV482	deletion	68	Chr24	55,965,752	55,965,821	1	1	0	1	0
483	INRA_BovSV483	deletion	74	Chr24	57,865,024	57,865,099	1	1	0	0	1
484	INRA_BovSV484	deletion	144	Chr24	58,395,207	58,395,352	3	5	2	2	1
485	INRA_BovSV485	inversion	640,782	Chr21	27,769,406	28,410,189	1	1	1	0	0
486	INRA_BovSV486	inversion	740,186	Chr21	27,728,359	28,468,546	1	1	1	0	0
487	INRA_BovSV487	Tandem duplication	138,197	Chr16	5,881,429	6,019,627	1	1	0	0	1
488	INRA_BovSV488	inversion	705,590	Chr21	27,748,232	28,453,803	1	2	0	0	2
489	INRA_BovSV489	inversion	1,567	Chr21	29,919,599	29,921,167	1	1	1	0	0
490	INRA_BovSV490	inversion	2,378	Chr21	26,367,681	26,370,060	1	1	0	0	1
491	INRA_BovSV491	deletion	91	Chr24	60,718,690	60,718,782	3	8	4	3	1
492	INRA_BovSV492	deletion	72	Chr24	60,771,232	60,771,305	1	1	0	0	1
493	INRA_BovSV493	deletion	86	Chr24	61,775,172	61,775,259	2	2	1	0	1
494	INRA_BovSV494	deletion	96	Chr24	61,792,667	61,792,764	1	1	0	1	0
495	INRA_BovSV495	deletion	65	Chr24	61,971,327	61,971,393	1	1	1	0	0
496	INRA_BovSV496	deletion	80	Chr24	62,118,874	62,118,955	1	1	0	0	1
497	INRA_BovSV497	inversion	1,327	Chr21	30,737,616	30,738,944	2	2	1	0	1
498	INRA_BovSV498	deletion	13,251	Chr24	62,372,902	62,386,154	3	6	1	2	3
499	INRA_BovSV499	deletion	13,255	Chr24	62,373,544	62,386,800	2	7	3	4	0
500	INRA_BovSV500	deletion	85	Chr24	62,448,358	62,448,444	2	2	1	1	0
501	INRA_BovSV501	deletion	52	Chr24	62,461,371	62,461,424	1	1	0	0	1
502	INRA_BovSV502	inversion	1,716	Chr21	31,291,710	31,293,401	1	1	0	1	0
503	INRA_BovSV503	deletion	13,231	Chr24	62,372,029	62,385,261	1	1	0	0	1
504	INRA_BovSV504	deletion	13,232	Chr24	62,372,029	62,385,262	2	2	1	1	0
505	INRA_BovSV505	deletion	13,246	Chr24	62,372,140	62,385,387	1	1	1	0	0
506	INRA_BovSV506	deletion	13,256	Chr24	62,373,632	62,386,889	2	3	0	2	1
507	INRA_BovSV507	inversion	1,468	Chr21	32,616,418	32,617,887	2	2	1	1	0
508	INRA_BovSV508	deletion	80	Chr25	74,491	74,572	1	1	0	1	0
509	INRA_BovSV509	inversion	4,353	Chr21	34,132,729	34,137,083	2	2	1	0	1
510	INRA_BovSV510	deletion	764	Chr25	1,703,996	1,704,761	2	2	1	0	1
511	INRA_BovSV511	deletion	77	Chr25	2,012,788	2,012,866	1	1	0	0	1
512	INRA_BovSV512	Tandem duplication	129,424	Chr16	5,898,868	6,028,293	1	4	4	0	0
513	INRA_BovSV513	inversion	2,557	Chr21	35,323,609	35,326,167	1	1	0	1	0
514	INRA_BovSV514	deletion	95	Chr25	74,502	74,598	2	2	1	1	0
515	INRA_BovSV515	deletion	24,352	Chr25	2,492,124	2,516,477	1	1	1	0	0
516	INRA_BovSV516	deletion	183	Chr11	31,678,483	31,678,667	1	1	1	0	0
517	INRA_BovSV517	deletion	97	Chr25	5,429,525	5,429,623	2	5	0	4	1
518	INRA_BovSV518	deletion	224	Chr25	7,197,884	7,198,109	1	1	1	0	0
519	INRA_BovSV519	deletion	760,178	Chr25	8,351,926	9,112,105	1	1	0	0	1
520	INRA_BovSV520	deletion	325	Chr25	8,384,479	8,384,805	1	1	0	0	1
521	INRA_BovSV521	deletion	325	Chr25	8,384,635	8,384,961	3	6	3	2	1
522	INRA_BovSV522	deletion	325	Chr25	8,384,680	8,385,006	3	6	2	2	2
523	INRA_BovSV523	deletion	57	Chr25	9,866,048	9,866,106	1	1	1	0	0
524	INRA_BovSV524	deletion	55	Chr25	5,154,620	5,154,676	1	1	0	1	0
525	INRA_BovSV525	inversion	10,868	Chr21	39,553,556	39,564,425	1	1	0	1	0
526	INRA_BovSV526	inversion	1,104	Chr21	42,059,235	42,060,332	1	1	0	0	1
527	INRA_BovSV527	Tandem duplication	203,570	Chr16	5,919,300	6,122,871	1	1	0	0	1
528	INRA_BovSV528	deletion	1,507,377	Chr25	10,769,027	12,276,405	2	3	0	1	2
529	INRA_BovSV529	deletion	9,977	Chr25	12,318,087	12,328,065	1	2	0	2	0
530	INRA_BovSV530	inversion	2,043	Chr21	41,918,512	41,920,556	1	1	1	0	0
531	INRA_BovSV531	inversion	26,557	Chr21	43,199,769	43,226,327	1	2	0	2	0
532	INRA_BovSV532	deletion	73	Chr25	13,733,067	13,733,141	1	1	0	0	1
533	INRA_BovSV533	inversion	1,682	Chr21	45,207,602	45,209,285	1	3	3	0	0
534	INRA_BovSV534	inversion	2,954	Chr11	17,565,590	17,568,521	1	1	0	1	0
535	INRA_BovSV535	inversion	1,907	Chr10	7,179,417	7,181,325	1	1	1	0	0
536	INRA_BovSV536	inversion	559	Chr21	46,597,296	46,597,856	2	3	0	2	1
537	INRA_BovSV537	inversion	8,967	Chr21	47,504,535	47,513,503	1	1	0	0	1
538	INRA_BovSV538	deletion	85	Chr25	15,567,348	15,567,434	3	11	3	7	1
539	INRA_BovSV539	deletion	2,474	Chr11	34,979,742	34,982,217	1	1	1	0	0
540	INRA_BovSV540	inversion	1,496	Chr21	45,207,692	45,209,189	1	1	0	1	0
541	INRA_BovSV541	inversion	32,226	Chr21	46,461,319	46,493,546	1	1	0	1	0
542	INRA_BovSV542	deletion	6,122	Chr25	18,473,952	18,480,075	3	5	1	2	2
543	INRA_BovSV543	deletion	3,783	Chr25	18,713,995	18,717,779	1	2	0	2	0
544	INRA_BovSV544	deletion	341,075	Chr25	14,878,531	15,219,607	1	1	0	1	0
545	INRA_BovSV545	Tandem duplication	524,492	Chr16	6,834,127	7,358,620	1	1	1	0	0
546	INRA_BovSV546	Tandem duplication	525,146	Chr16	6,837,277	7,362,424	1	1	0	0	1
547	INRA_BovSV547	Tandem duplication	2,137,310	Chr16	6,844,387	8,981,698	3	24	8	6	10
548	INRA_BovSV548	deletion	422	Chr25	21,397,714	21,398,137	3	5	2	1	2
549	INRA_BovSV549	deletion	4,240	Chr25	21,552,500	21,556,741	2	2	1	0	1
550	INRA_BovSV550	deletion	54	Chr25	23,085,544	23,085,599	2	3	0	2	1
551	INRA_BovSV551	inversion	1,083	Chr21	54,173,095	54,174,177	1	1	0	1	0
552	INRA_BovSV552	deletion	959	Chr25	24,166,586	24,167,546	3	7	3	3	1
553	INRA_BovSV553	inversion	2,546	Chr21	54,762,828	54,765,375	1	1	0	1	0
554	INRA_BovSV554	inversion	585	Chr21	51,699,661	51,700,247	1	1	0	1	0
555	INRA_BovSV555	Tandem duplication	465,561	Chr10	24,321,412	24,786,974	1	1	0	1	0
556	INRA_BovSV556	inversion	5,244	Chr21	56,011,003	56,016,248	1	1	0	1	0
557	INRA_BovSV557	inversion	3,512	Chr21	56,541,159	56,544,672	1	1	0	0	1
558	INRA_BovSV558	Tandem duplication	4,136	Chr16	6,873,677	6,877,814	1	1	0	0	1
559	INRA_BovSV559	deletion	70,823	Chr25	27,227,259	27,298,083	3	5	3	1	1
560	INRA_BovSV560	deletion	61,032	Chr25	27,661,996	27,723,029	2	6	2	0	4
561	INRA_BovSV561	deletion	92,895	Chr25	28,147,227	28,240,123	2	3	1	2	0
562	INRA_BovSV562	inversion	885	Chr21	58,354,149	58,355,013	1	1	1	0	0
563	INRA_BovSV563	inversion	3,616	Chr21	60,763,118	60,766,735	1	1	1	0	0
564	INRA_BovSV564	deletion	136	Chr25	31,310,820	31,310,957	3	4	2	1	1
565	INRA_BovSV565	inversion	11,671	Chr11	16,330,417	16,342,089	1	1	0	1	0
566	INRA_BovSV566	Tandem duplication	555,681	Chr16	6,952,854	7,508,536	1	1	1	0	0
567	INRA_BovSV567	deletion	5,335	Chr25	32,372,781	32,378,117	2	6	1	5	0
568	INRA_BovSV568	deletion	121	Chr11	37,276,631	37,276,753	1	1	1	0	0
569	INRA_BovSV569	inversion	1,459	Chr11	16,345,433	16,346,893	1	1	1	0	0
570	INRA_BovSV570	Tandem duplication	701,777	Chr16	6,967,405	7,669,183	1	1	0	0	1
571	INRA_BovSV571	deletion	83	Chr25	34,251,417	34,251,501	1	1	0	1	0
572	INRA_BovSV572	deletion	1,659	Chr25	34,544,209	34,545,869	1	1	1	0	0
573	INRA_BovSV573	Tandem duplication	4,666	Chr16	6,972,452	6,977,119	2	2	1	0	1
574	INRA_BovSV574	inversion	7,710	Chr21	60,323,606	60,331,317	1	1	0	1	0
575	INRA_BovSV575	deletion	915	Chr25	35,518,106	35,519,022	2	4	1	0	3
576	INRA_BovSV576	deletion	1,610	Chr25	36,149,350	36,150,961	3	3	1	1	1
577	INRA_BovSV577	Tandem duplication	749,155	Chr16	6,995,057	7,744,213	2	2	0	1	1
578	INRA_BovSV578	inversion	4,048	Chr10	7,983,142	7,987,191	1	1	1	0	0
579	INRA_BovSV579	deletion	74,585	Chr25	37,154,000	37,228,586	2	2	1	0	1
580	INRA_BovSV580	deletion	71,834	Chr25	37,189,790	37,261,625	1	1	0	0	1
581	INRA_BovSV581	deletion	71,846	Chr25	37,193,488	37,265,335	3	4	1	1	2
582	INRA_BovSV582	inversion	2,011	Chr21	65,676,355	65,678,355	1	1	1	0	0
583	INRA_BovSV583	inversion	4,517	Chr21	66,528,449	66,532,967	1	1	1	0	0
584	INRA_BovSV584	Tandem duplication	28,821	Chr16	7,004,352	7,033,174	1	1	1	0	0
585	INRA_BovSV585	inversion	27,370	Chr21	67,824,072	67,851,443	1	1	0	1	0
586	INRA_BovSV586	inversion	5,819	Chr21	70,248,509	70,254,329	1	1	1	0	0
587	INRA_BovSV587	deletion	66	Chr25	40,794,029	40,794,096	1	1	1	0	0
588	INRA_BovSV588	deletion	71	Chr25	42,509,987	42,510,059	1	1	1	0	0
589	INRA_BovSV589	Tandem duplication	109,673	Chr16	7,071,898	7,181,572	1	1	1	0	0
590	INRA_BovSV590	inversion	45,400	Chr21	71,517,117	71,562,518	1	1	0	0	1
591	INRA_BovSV591	deletion	8,353	Chr26	1,466	9,820	2	4	3	1	0
592	INRA_BovSV592	Tandem duplication	109,665	Chr16	7,073,368	7,183,034	3	8	5	1	2
593	INRA_BovSV593	deletion	57	Chr11	38,883,494	38,883,552	1	1	0	1	0
594	INRA_BovSV594	inversion	8,375	Chr22	527,849	536,199	1	1	1	0	0
595	INRA_BovSV595	deletion	904	Chr26	1,803,199	1,804,104	2	4	1	0	3
596	INRA_BovSV596	inversion	45,439	Chr22	768,270	813,710	2	4	3	0	1
597	INRA_BovSV597	deletion	501	Chr26	2,653,723	2,654,225	2	6	0	1	5
598	INRA_BovSV598	inversion	2,451	Chr22	1,450,689	1,453,141	1	1	1	0	0
599	INRA_BovSV599	inversion	415	Chr22	1,736,769	1,737,173	1	1	1	0	0
600	INRA_BovSV600	inversion	532	Chr22	2,948,831	2,949,348	1	2	2	0	0
601	INRA_BovSV601	deletion	3,290	Chr26	4,833,300	4,836,591	3	11	4	2	5
602	INRA_BovSV602	deletion	3,290	Chr26	4,833,306	4,836,597	2	3	2	1	0
603	INRA_BovSV603	inversion	2,684	Chr22	4,589,496	4,592,181	1	1	1	0	0
604	INRA_BovSV604	inversion	4,012	Chr22	475,764	479,777	1	1	0	0	1
605	INRA_BovSV605	deletion	28,656	Chr26	2,771,599	2,800,256	2	2	1	0	1
606	INRA_BovSV606	Tandem duplication	113,976	Chr16	7,104,878	7,218,855	3	10	5	2	3
607	INRA_BovSV607	inversion	13,367	Chr22	3,683,405	3,696,773	1	1	1	0	0
608	INRA_BovSV608	deletion	328	Chr26	5,109,830	5,110,159	2	2	1	0	1
609	INRA_BovSV609	Tandem duplication	181,491	Chr16	7,150,138	7,331,630	2	4	1	0	3
610	INRA_BovSV610	deletion	1,732	Chr26	7,088,824	7,090,557	1	1	1	0	0
611	INRA_BovSV611	deletion	85	Chr26	7,114,021	7,114,107	1	1	0	0	1
612	INRA_BovSV612	deletion	64	Chr26	7,114,042	7,114,107	2	4	1	0	3
613	INRA_BovSV613	Tandem duplication	395,102	Chr16	7,152,118	7,547,221	3	29	11	8	10
614	INRA_BovSV614	deletion	56	Chr26	7,909,108	7,909,165	1	1	0	0	1
615	INRA_BovSV615	inversion	15,196	Chr22	8,621,208	8,636,383	1	1	1	0	0
616	INRA_BovSV616	deletion	55	Chr26	8,971,045	8,971,101	1	1	1	0	0
617	INRA_BovSV617	inversion	1,761	Chr22	13,321,838	13,323,586	1	1	0	1	0
618	INRA_BovSV618	inversion	61,150	Chr22	13,939,715	14,000,866	2	3	2	1	0
619	INRA_BovSV619	deletion	234	Chr26	10,545,329	10,545,564	2	2	1	1	0
620	INRA_BovSV620	inversion	732	Chr22	12,039,856	12,040,589	1	2	0	2	0
621	INRA_BovSV621	inversion	1,279	Chr11	21,231,900	21,233,160	1	1	1	0	0
622	INRA_BovSV622	inversion	1,142	Chr22	18,684,425	18,685,556	1	1	1	0	0
623	INRA_BovSV623	deletion	68	Chr26	13,242,645	13,242,714	1	1	0	0	1
624	INRA_BovSV624	deletion	61	Chr26	15,059,403	15,059,465	1	1	0	1	0
625	INRA_BovSV625	deletion	61	Chr26	15,447,453	15,447,515	2	3	2	0	1
626	INRA_BovSV626	deletion	75	Chr26	17,603,307	17,603,383	3	24	9	5	10
627	INRA_BovSV627	Tandem duplication	280,424	Chr16	7,284,828	7,565,253	3	7	2	2	3
628	INRA_BovSV628	deletion	73	Chr26	18,678,120	18,678,194	3	4	1	2	1
629	INRA_BovSV629	deletion	1,668	Chr26	19,848,534	19,850,203	1	1	1	0	0
630	INRA_BovSV630	inversion	1,181	Chr22	21,149,586	21,150,768	1	1	1	0	0
631	INRA_BovSV631	inversion	647,106	Chr11	22,021,471	22,668,578	1	1	0	0	1
632	INRA_BovSV632	inversion	2,281	Chr22	23,401,525	23,403,771	1	1	0	1	0
633	INRA_BovSV633	inversion	617	Chr22	24,006,220	24,006,838	1	1	1	0	0
634	INRA_BovSV634	Tandem duplication	61,423	Chr16	7,484,497	7,545,921	1	1	0	0	1
635	INRA_BovSV635	deletion	60	Chr26	23,040,463	23,040,524	1	1	1	0	0
636	INRA_BovSV636	deletion	72	Chr26	23,090,918	23,090,991	2	3	0	1	2
637	INRA_BovSV637	deletion	72	Chr26	23,090,966	23,091,039	1	1	0	0	1
638	INRA_BovSV638	deletion	143	Chr26	23,270,191	23,270,335	1	1	0	0	1
639	INRA_BovSV639	Tandem duplication	310,360	Chr16	7,504,563	7,814,924	1	1	0	1	0
640	INRA_BovSV640	deletion	914	Chr26	24,259,797	24,260,712	1	1	0	1	0
641	INRA_BovSV641	inversion	2,578	Chr22	25,454,016	25,456,575	1	1	0	1	0
642	INRA_BovSV642	deletion	898,004	Chr26	25,714,521	26,612,526	1	2	0	0	2
643	INRA_BovSV643	deletion	174	Chr26	25,887,250	25,887,425	2	3	2	1	0
644	INRA_BovSV644	deletion	94	Chr26	25,952,518	25,952,613	1	2	2	0	0
645	INRA_BovSV645	Tandem duplication	14,649	Chr16	7,616,330	7,630,980	2	2	1	0	1
646	INRA_BovSV646	deletion	162	Chr26	28,105,555	28,105,718	3	16	8	4	4
647	INRA_BovSV647	deletion	126	Chr26	28,735,025	28,735,152	3	14	7	4	3
648	INRA_BovSV648	deletion	231	Chr26	28,753,857	28,754,089	3	44	23	8	13
649	INRA_BovSV649	inversion	14,136	Chr22	29,125,813	29,139,950	1	1	1	0	0
650	INRA_BovSV650	deletion	56	Chr26	29,237,512	29,237,569	2	3	2	0	1
651	INRA_BovSV651	inversion	3,705	Chr22	26,498,030	26,501,736	1	1	1	0	0
652	INRA_BovSV652	deletion	63	Chr26	29,728,121	29,728,185	1	1	0	1	0
653	INRA_BovSV653	deletion	3,354,015	Chr26	25,297,806	28,651,822	1	1	0	0	1
654	INRA_BovSV654	inversion	432,638	Chr22	30,111,963	30,544,562	1	1	1	0	0
655	INRA_BovSV655	inversion	2,666	Chr11	23,165,401	23,168,068	1	1	0	1	0
656	INRA_BovSV656	Tandem duplication	131,531	Chr16	7,651,754	7,783,286	3	3	1	1	1
657	INRA_BovSV657	inversion	1,417	Chr22	32,995,482	32,996,900	1	1	1	0	0
658	INRA_BovSV658	deletion	66	Chr26	32,142,571	32,142,638	1	3	0	3	0
659	INRA_BovSV659	deletion	70	Chr26	32,142,653	32,142,724	3	4	1	1	2
660	INRA_BovSV660	inversion	1,703	Chr22	34,738,537	34,740,241	1	1	0	0	1
661	INRA_BovSV661	Tandem duplication	144,985	Chr16	7,782,311	7,927,297	1	1	0	1	0
662	INRA_BovSV662	inversion	6,430	Chr22	35,351,783	35,358,214	1	1	0	0	1
663	INRA_BovSV663	Tandem duplication	960,814	Chr16	8,184,968	9,145,783	3	10	2	2	6
664	INRA_BovSV664	deletion	3,643	Chr26	35,538,557	35,542,201	1	1	1	0	0
665	INRA_BovSV665	deletion	2,601	Chr26	37,951,148	37,953,750	1	1	0	0	1
666	INRA_BovSV666	Tandem duplication	44,862	Chr16	12,468,282	12,513,145	3	4	1	1	2
667	INRA_BovSV667	inversion	2,185	Chr22	41,362,654	41,364,840	1	1	0	1	0
668	INRA_BovSV668	Tandem duplication	7,194	Chr16	18,047,115	18,054,310	1	2	0	2	0
669	INRA_BovSV669	Tandem duplication	490,544	Chr10	24,461,165	24,951,710	3	3	1	1	1
670	INRA_BovSV670	inversion	1,039	Chr22	41,532,887	41,533,927	1	1	1	0	0
671	INRA_BovSV671	Tandem duplication	1,853,190	Chr16	25,878,959	27,732,150	1	2	2	0	0
672	INRA_BovSV672	inversion	3,860	Chr22	42,986,632	42,990,493	1	1	0	1	0
673	INRA_BovSV673	inversion	8,995	Chr22	44,112,188	44,121,184	1	1	1	0	0
674	INRA_BovSV674	deletion	84	Chr26	41,475,532	41,475,617	1	1	1	0	0
675	INRA_BovSV675	deletion	8,951	Chr26	42,785,557	42,794,509	3	23	3	15	5
676	INRA_BovSV676	deletion	8,951	Chr26	42,785,593	42,794,545	1	1	1	0	0
677	INRA_BovSV677	deletion	3,283	Chr26	42,789,757	42,793,041	3	51	21	14	16
678	INRA_BovSV678	deletion	60	Chr26	43,086,635	43,086,696	1	1	1	0	0
679	INRA_BovSV679	inversion	4,108	Chr22	45,340,873	45,344,982	1	1	1	0	0
680	INRA_BovSV680	inversion	978	Chr22	45,605,066	45,606,045	1	1	0	1	0
681	INRA_BovSV681	deletion	203	Chr26	44,523,644	44,523,848	3	14	8	4	2
682	INRA_BovSV682	inversion	762	Chr22	48,987,623	48,988,386	1	1	1	0	0
683	INRA_BovSV683	inversion	1,107	Chr22	49,372,832	49,373,940	2	3	2	1	0
684	INRA_BovSV684	inversion	990	Chr22	49,372,891	49,373,882	1	1	1	0	0
685	INRA_BovSV685	deletion	1,346	Chr11	42,146,131	42,147,478	1	1	0	1	0
686	INRA_BovSV686	deletion	87	Chr26	45,637,986	45,638,074	1	1	0	0	1
687	INRA_BovSV687	deletion	88	Chr26	45,638,036	45,638,125	3	12	6	2	4
688	INRA_BovSV688	deletion	74	Chr26	47,126,455	47,126,530	3	5	1	2	2
689	INRA_BovSV689	deletion	60	Chr26	47,585,947	47,586,008	2	5	1	0	4
690	INRA_BovSV690	deletion	51	Chr26	47,780,492	47,780,544	1	2	2	0	0
691	INRA_BovSV691	deletion	51	Chr26	47,808,774	47,808,826	1	1	0	0	1
692	INRA_BovSV692	inversion	5,010,341	Chr22	52,880,804	57,891,112	1	1	1	0	0
693	INRA_BovSV693	deletion	68	Chr26	48,456,485	48,456,554	2	2	1	0	1
694	INRA_BovSV694	inversion	979	Chr11	24,293,322	24,294,302	1	1	0	1	0
695	INRA_BovSV695	inversion	1,815	Chr22	55,721,995	55,723,811	1	1	1	0	0
696	INRA_BovSV696	deletion	89	Chr26	45,638,054	45,638,144	2	6	0	5	1
697	INRA_BovSV697	deletion	98	Chr26	45,805,663	45,805,762	1	1	0	1	0
698	INRA_BovSV698	Tandem duplication	751	Chr16	72,035,816	72,036,568	1	1	0	0	1
699	INRA_BovSV699	inversion	10,478	Chr22	59,938,360	59,948,813	1	1	0	1	0
700	INRA_BovSV700	deletion	129	Chr26	48,463,576	48,463,706	1	1	1	0	0
701	INRA_BovSV701	deletion	64	Chr26	50,084,086	50,084,151	2	2	1	0	1
702	INRA_BovSV702	Tandem duplication	3,571	Chr16	75,126,230	75,129,802	2	3	2	0	1
703	INRA_BovSV703	deletion	64	Chr26	50,183,919	50,183,984	1	1	0	0	1
704	INRA_BovSV704	deletion	53	Chr26	50,375,942	50,375,996	1	2	2	0	0
705	INRA_BovSV705	deletion	20,964	Chr26	50,547,589	50,568,554	1	1	1	0	0
706	INRA_BovSV706	deletion	92	Chr26	51,290,114	51,290,207	3	21	13	3	5
707	INRA_BovSV707	deletion	87	Chr26	51,347,808	51,347,896	1	4	4	0	0
708	INRA_BovSV708	deletion	56	Chr26	50,254,867	50,254,924	1	1	0	1	0
709	INRA_BovSV709	inversion	6,626	Chr11	24,911,087	24,917,714	1	1	0	1	0
710	INRA_BovSV710	deletion	134	Chr26	51,348,012	51,348,147	1	2	2	0	0
711	INRA_BovSV711	inversion	3,632	Chr23	523,696	527,329	1	1	1	0	0
712	INRA_BovSV712	inversion	7,723,817	Chr11	16,321,862	24,045,680	1	1	0	0	1
713	INRA_BovSV713	inversion	8,529	Chr23	1,435,579	1,444,077	1	1	1	0	0
714	INRA_BovSV714	Tandem duplication	152	Chr16	78,446,612	78,446,765	1	1	0	0	1
715	INRA_BovSV715	deletion	78	Chr27	3,478,748	3,478,827	1	1	0	1	0
716	INRA_BovSV716	deletion	97	Chr27	3,910,199	3,910,297	2	8	7	0	1
717	INRA_BovSV717	deletion	72	Chr27	642,819	642,892	1	1	1	0	0
718	INRA_BovSV718	inversion	6,899	Chr23	2,522,531	2,529,431	1	1	1	0	0
719	INRA_BovSV719	deletion	74	Chr27	2,388,693	2,388,768	2	4	3	0	1
720	INRA_BovSV720	inversion	1,614	Chr23	4,418,259	4,419,874	1	1	1	0	0
721	INRA_BovSV721	inversion	5,414	Chr11	22,609,527	22,614,942	1	1	0	1	0
722	INRA_BovSV722	Tandem duplication	28,570	Chr17	14,200,010	14,228,581	3	21	6	9	6
723	INRA_BovSV723	deletion	3,823	Chr27	5,100,158	5,103,982	1	2	2	0	0
724	INRA_BovSV724	deletion	124,984	Chr27	5,170,387	5,295,372	3	10	2	5	3
725	INRA_BovSV725	deletion	116,878	Chr27	5,175,760	5,292,639	3	47	15	17	15
726	INRA_BovSV726	deletion	116,879	Chr27	5,175,797	5,292,677	3	30	8	13	9
727	INRA_BovSV727	deletion	997,166	Chr27	5,235,005	6,232,172	2	3	0	1	2
728	INRA_BovSV728	deletion	33,096	Chr27	5,239,507	5,272,604	3	39	15	16	8
729	INRA_BovSV729	deletion	557,028	Chr27	5,240,016	5,797,045	3	13	8	2	3
730	INRA_BovSV730	deletion	557,027	Chr27	5,240,031	5,797,059	3	3	1	1	1
731	INRA_BovSV731	deletion	991,743	Chr27	5,241,704	6,233,448	2	15	11	4	0
732	INRA_BovSV732	deletion	580,750	Chr27	5,271,569	5,852,320	1	1	0	1	0
733	INRA_BovSV733	deletion	25,133	Chr27	5,286,921	5,312,055	2	3	0	1	2
734	INRA_BovSV734	inversion	1,753	Chr23	4,221,753	4,223,507	1	1	0	1	0
735	INRA_BovSV735	deletion	137,392	Chr27	5,426,819	5,564,212	1	1	1	0	0
736	INRA_BovSV736	deletion	7,709	Chr27	5,459,997	5,467,707	3	4	1	2	1
737	INRA_BovSV737	deletion	987,062	Chr27	5,470,744	6,457,807	3	26	12	8	6
738	INRA_BovSV738	deletion	475,687	Chr27	5,471,130	5,946,818	1	1	0	1	0
739	INRA_BovSV739	deletion	45,216	Chr27	5,503,856	5,549,073	2	2	1	1	0
740	INRA_BovSV740	deletion	45,416	Chr27	5,506,337	5,551,754	1	1	0	1	0
741	INRA_BovSV741	deletion	17,037	Chr27	5,515,794	5,532,832	1	1	1	0	0
742	INRA_BovSV742	deletion	17,036	Chr27	5,515,807	5,532,844	1	1	0	1	0
743	INRA_BovSV743	deletion	1,727	Chr27	5,552,380	5,554,108	3	7	4	1	2
744	INRA_BovSV744	deletion	584,124	Chr27	5,892,896	6,477,021	1	1	1	0	0
745	INRA_BovSV745	deletion	584,124	Chr27	5,893,027	6,477,152	3	24	11	5	8
746	INRA_BovSV746	deletion	68,788	Chr27	5,893,129	5,961,918	2	2	1	0	1
747	INRA_BovSV747	deletion	512,056	Chr27	5,942,481	6,454,538	3	7	1	2	4
748	INRA_BovSV748	deletion	512,056	Chr27	5,942,512	6,454,569	3	15	4	5	6
749	INRA_BovSV749	deletion	511,385	Chr27	5,946,926	6,458,312	1	1	1	0	0
750	INRA_BovSV750	inversion	2,984	Chr23	4,765,139	4,768,124	1	1	1	0	0
751	INRA_BovSV751	Tandem duplication	29,118	Chr17	14,201,061	14,230,180	3	6	1	3	2
752	INRA_BovSV752	deletion	381	Chr27	8,269,372	8,269,754	1	1	1	0	0
753	INRA_BovSV753	deletion	14,370	Chr11	44,717,210	44,731,581	1	1	0	0	1
754	INRA_BovSV754	inversion	1,756	Chr11	24,395,903	24,397,660	1	1	1	0	0
755	INRA_BovSV755	inversion	1,982	Chr23	5,821,550	5,823,525	1	1	1	0	0
756	INRA_BovSV756	deletion	99	Chr11	44,791,937	44,792,037	1	1	1	0	0
757	INRA_BovSV757	deletion	284	Chr27	9,406,718	9,407,003	2	9	2	0	7
758	INRA_BovSV758	deletion	54	Chr27	9,889,822	9,889,877	2	5	1	4	0
759	INRA_BovSV759	deletion	242,770	Chr27	4,858,353	5,101,124	1	1	0	0	1
760	INRA_BovSV760	deletion	116,879	Chr27	5,175,772	5,292,652	2	2	1	1	0
761	INRA_BovSV761	deletion	33,116	Chr27	5,239,513	5,272,630	1	1	1	0	0
762	INRA_BovSV762	deletion	33,097	Chr27	5,239,517	5,272,615	2	2	1	1	0
763	INRA_BovSV763	deletion	991,750	Chr27	5,241,693	6,233,444	2	4	3	1	0
764	INRA_BovSV764	deletion	175	Chr27	5,258,896	5,259,072	1	2	2	0	0
765	INRA_BovSV765	deletion	585,058	Chr27	5,339,398	5,924,457	1	1	1	0	0
766	INRA_BovSV766	deletion	17,041	Chr27	5,515,806	5,532,848	1	1	0	1	0
767	INRA_BovSV767	deletion	239,732	Chr27	5,662,426	5,902,159	1	1	1	0	0
768	INRA_BovSV768	deletion	517,278	Chr27	5,755,971	6,273,250	2	2	1	0	1
769	INRA_BovSV769	Tandem duplication	19,517	Chr17	14,213,115	14,232,633	1	1	0	1	0
770	INRA_BovSV770	deletion	498,626	Chr27	10,278,348	10,776,975	1	1	1	0	0
771	INRA_BovSV771	deletion	1,948,992	Chr27	11,579,067	13,528,060	1	1	1	0	0
772	INRA_BovSV772	Tandem duplication	19,871	Chr17	14,215,952	14,235,824	3	15	6	5	4
773	INRA_BovSV773	inversion	1,177	Chr23	17,178,568	17,179,746	1	1	1	0	0
774	INRA_BovSV774	inversion	4,796	Chr23	15,665,682	15,670,479	2	2	1	0	1
775	INRA_BovSV775	Tandem duplication	27,922	Chr17	14,217,756	14,245,679	3	15	6	6	3
776	INRA_BovSV776	inversion	5,895	Chr23	21,772,007	21,777,891	1	1	1	0	0
777	INRA_BovSV777	Tandem duplication	27,920	Chr17	14,217,758	14,245,679	1	1	0	1	0
778	INRA_BovSV778	inversion	79,284	Chr23	24,769,529	24,848,788	1	1	0	1	0
779	INRA_BovSV779	Tandem duplication	174,937	Chr17	14,219,230	14,394,168	3	49	19	16	14
780	INRA_BovSV780	deletion	147	Chr27	16,898,935	16,899,083	3	9	4	2	3
781	INRA_BovSV781	deletion	3,386	Chr27	17,026,843	17,030,230	3	41	18	12	11
782	INRA_BovSV782	deletion	140	Chr27	17,033,713	17,033,854	1	1	0	0	1
783	INRA_BovSV783	inversion	1,038	Chr23	21,737,633	21,738,672	1	1	1	0	0
784	INRA_BovSV784	inversion	1,290	Chr23	21,904,658	21,905,949	1	1	0	0	1
785	INRA_BovSV785	deletion	3,719	Chr27	17,797,758	17,801,478	2	2	1	1	0
786	INRA_BovSV786	Tandem duplication	172,645	Chr17	14,222,461	14,395,107	2	2	0	1	1
787	INRA_BovSV787	deletion	772	Chr27	18,467,249	18,468,022	3	4	2	1	1
788	INRA_BovSV788	inversion	609,820	Chr23	25,686,007	26,295,828	1	1	1	0	0
789	INRA_BovSV789	deletion	3,391	Chr27	17,026,722	17,030,114	1	1	1	0	0
790	INRA_BovSV790	inversion	438,310	Chr23	25,912,967	26,351,278	1	1	1	0	0
791	INRA_BovSV791	inversion	306,844	Chr23	26,049,291	26,356,136	1	1	1	0	0
792	INRA_BovSV792	deletion	143	Chr27	20,006,854	20,006,998	1	1	0	1	0
793	INRA_BovSV793	Tandem duplication	174,783	Chr17	14,229,626	14,404,410	2	9	3	0	6
794	INRA_BovSV794	inversion	706,904	Chr23	27,718,351	28,425,256	2	2	1	0	1
795	INRA_BovSV795	inversion	152,097	Chr23	29,265,535	29,417,633	1	1	0	0	1
796	INRA_BovSV796	inversion	1,059,697	Chr23	24,541,227	25,600,925	1	1	1	0	0
797	INRA_BovSV797	deletion	58	Chr27	23,607,106	23,607,165	2	2	0	1	1
798	INRA_BovSV798	deletion	236	Chr27	23,680,506	23,680,743	3	36	14	10	12
799	INRA_BovSV799	inversion	814	Chr11	27,391,315	27,392,130	1	1	0	1	0
800	INRA_BovSV800	Tandem duplication	148,350	Chr17	14,246,717	14,395,068	1	1	1	0	0
801	INRA_BovSV801	inversion	304,528	Chr23	25,685,789	25,990,318	1	1	0	0	1
802	INRA_BovSV802	inversion	295,909	Chr23	25,690,087	25,985,997	1	1	0	0	1
803	INRA_BovSV803	inversion	295,826	Chr23	25,690,129	25,985,956	1	1	1	0	0
804	INRA_BovSV804	inversion	306,837	Chr23	26,049,293	26,356,131	1	1	1	0	0
805	INRA_BovSV805	inversion	275,520	Chr23	26,065,650	26,341,171	1	1	0	1	0
806	INRA_BovSV806	inversion	49,823	Chr23	26,617,737	26,667,561	1	1	0	0	1
807	INRA_BovSV807	inversion	91,788	Chr23	26,623,654	26,715,443	1	1	0	1	0
808	INRA_BovSV808	deletion	2,615	Chr27	28,526,728	28,529,344	2	2	1	0	1
809	INRA_BovSV809	deletion	98,251	Chr27	28,695,444	28,793,696	1	1	1	0	0
810	INRA_BovSV810	deletion	98,049	Chr27	28,709,409	28,807,459	3	14	2	6	6
811	INRA_BovSV811	inversion	729,232	Chr23	27,602,473	28,331,706	1	1	1	0	0
812	INRA_BovSV812	inversion	5,462	Chr23	28,581,792	28,587,255	1	1	1	0	0
813	INRA_BovSV813	Tandem duplication	4,137	Chr17	32,196,251	32,200,389	1	1	1	0	0
814	INRA_BovSV814	deletion	217,641	Chr27	28,646,868	28,864,510	2	2	1	0	1
815	INRA_BovSV815	Tandem duplication	16,152	Chr17	33,998,225	34,014,378	1	1	0	1	0
816	INRA_BovSV816	Tandem duplication	1,752,955	Chr10	17,961,778	19,714,734	1	1	1	0	0
817	INRA_BovSV817	inversion	4,144	Chr23	29,944,089	29,948,234	1	2	2	0	0
818	INRA_BovSV818	Tandem duplication	9,163	Chr17	35,487,053	35,496,217	1	1	0	1	0
819	INRA_BovSV819	inversion	109,012	Chr23	30,586,825	30,695,836	1	1	0	1	0
820	INRA_BovSV820	inversion	65,898	Chr23	30,614,083	30,679,982	2	3	2	1	0
821	INRA_BovSV821	inversion	1,990	Chr23	32,816,692	32,818,683	1	1	1	0	0
822	INRA_BovSV822	deletion	36,977	Chr11	47,049,649	47,086,627	1	1	1	0	0
823	INRA_BovSV823	deletion	19,694	Chr11	47,050,411	47,070,106	1	1	0	0	1
824	INRA_BovSV824	deletion	36,979	Chr11	47,050,544	47,087,524	1	2	2	0	0
825	INRA_BovSV825	deletion	32,432	Chr11	47,066,837	47,099,270	3	12	5	5	2
826	INRA_BovSV826	deletion	33,396	Chr11	47,073,525	47,106,922	2	2	1	1	0
827	INRA_BovSV827	Tandem duplication	5,479	Chr17	35,643,884	35,649,364	3	8	2	3	3
828	INRA_BovSV828	inversion	4,939	Chr23	34,263,380	34,268,320	1	1	0	1	0
829	INRA_BovSV829	inversion	32,788	Chr23	30,637,271	30,670,060	1	1	1	0	0
830	INRA_BovSV830	inversion	29,570	Chr23	30,638,881	30,668,452	1	1	1	0	0
831	INRA_BovSV831	inversion	553	Chr23	31,763,482	31,764,036	1	1	1	0	0
832	INRA_BovSV832	deletion	99	Chr27	35,817,481	35,817,581	3	13	6	2	5
833	INRA_BovSV833	Tandem duplication	1,738	Chr17	35,645,651	35,647,390	1	1	0	1	0
834	INRA_BovSV834	deletion	80	Chr27	36,382,755	36,382,836	3	5	1	2	2
835	INRA_BovSV835	deletion	184	Chr27	38,096,509	38,096,694	3	42	21	8	13
836	INRA_BovSV836	inversion	1,036	Chr23	35,808,519	35,809,556	1	1	1	0	0
837	INRA_BovSV837	deletion	82	Chr27	38,489,267	38,489,350	1	1	0	1	0
838	INRA_BovSV838	inversion	20,737	Chr23	36,971,346	36,992,084	1	1	0	1	0
839	INRA_BovSV839	deletion	59	Chr27	39,775,629	39,775,689	1	1	0	0	1
840	INRA_BovSV840	Tandem duplication	3,855	Chr17	35,647,390	35,651,246	1	1	0	1	0
841	INRA_BovSV841	inversion	4,973	Chr23	38,361,501	38,366,475	1	1	0	0	1
842	INRA_BovSV842	deletion	232	Chr27	39,412,628	39,412,861	1	1	1	0	0
843	INRA_BovSV843	deletion	79	Chr27	39,596,297	39,596,377	1	1	1	0	0
844	INRA_BovSV844	inversion	834	Chr23	38,922,314	38,923,149	1	1	0	0	1
845	INRA_BovSV845	Tandem duplication	7,368	Chr17	35,647,505	35,654,874	1	2	0	2	0
846	INRA_BovSV846	inversion	7,513	Chr23	39,314,020	39,321,534	1	1	1	0	0
847	INRA_BovSV847	deletion	61	Chr27	41,468,454	41,468,516	1	1	0	0	1
848	INRA_BovSV848	deletion	64	Chr27	41,468,455	41,468,520	1	1	1	0	0
849	INRA_BovSV849	deletion	63	Chr27	41,468,518	41,468,582	3	27	7	12	8
850	INRA_BovSV850	Tandem duplication	7,371	Chr17	35,647,505	35,654,877	3	5	1	3	1
851	INRA_BovSV851	deletion	88	Chr27	41,705,329	41,705,418	3	36	15	11	10
852	INRA_BovSV852	deletion	119	Chr27	42,149,272	42,149,392	2	2	1	1	0
853	INRA_BovSV853	deletion	60	Chr27	42,165,209	42,165,270	3	7	3	3	1
854	INRA_BovSV854	deletion	69	Chr27	42,166,792	42,166,862	2	5	0	2	3
855	INRA_BovSV855	deletion	65	Chr27	42,329,309	42,329,375	1	1	0	0	1
856	INRA_BovSV856	deletion	61	Chr27	42,346,846	42,346,908	1	1	0	1	0
857	INRA_BovSV857	deletion	88	Chr27	42,781,643	42,781,732	1	1	1	0	0
858	INRA_BovSV858	deletion	52	Chr27	42,852,370	42,852,423	2	3	1	0	2
859	INRA_BovSV859	deletion	94	Chr27	42,873,380	42,873,475	1	1	1	0	0
860	INRA_BovSV860	inversion	743	Chr23	41,961,801	41,962,545	1	1	0	1	0
861	INRA_BovSV861	deletion	144	Chr27	43,081,797	43,081,942	3	12	4	3	5
862	INRA_BovSV862	deletion	145	Chr27	43,081,860	43,082,006	3	7	4	1	2
863	INRA_BovSV863	inversion	14,864	Chr23	43,347,697	43,362,562	2	2	1	1	0
864	INRA_BovSV864	deletion	66	Chr27	43,971,680	43,971,747	2	4	2	0	2
865	INRA_BovSV865	inversion	1,812	Chr23	44,116,470	44,118,275	1	1	1	0	0
866	INRA_BovSV866	deletion	60	Chr27	44,004,329	44,004,390	1	3	3	0	0
867	INRA_BovSV867	inversion	2,147	Chr23	44,342,350	44,344,480	1	1	1	0	0
868	INRA_BovSV868	deletion	53	Chr27	44,353,838	44,353,892	3	6	1	3	2
869	INRA_BovSV869	deletion	52	Chr27	44,404,248	44,404,301	1	1	1	0	0
870	INRA_BovSV870	deletion	56	Chr27	44,765,685	44,765,742	1	2	2	0	0
871	INRA_BovSV871	deletion	80	Chr27	44,820,887	44,820,968	2	3	0	2	1
872	INRA_BovSV872	inversion	4,410	Chr23	41,112,989	41,117,400	1	1	1	0	0
873	INRA_BovSV873	deletion	34,242	Chr11	49,052,572	49,086,815	3	3	1	1	1
874	INRA_BovSV874	deletion	34,247	Chr11	49,053,387	49,087,635	1	2	2	0	0
875	INRA_BovSV875	deletion	35,301	Chr11	49,059,324	49,094,626	2	2	1	0	1
876	INRA_BovSV876	deletion	26,573	Chr11	49,074,379	49,100,953	1	2	2	0	0
877	INRA_BovSV877	deletion	27,280	Chr11	49,076,697	49,103,978	3	22	11	3	8
878	INRA_BovSV878	deletion	27,460	Chr11	49,078,854	49,106,315	3	44	18	14	12
879	INRA_BovSV879	deletion	27,464	Chr11	49,080,457	49,107,922	1	1	0	0	1
880	INRA_BovSV880	deletion	76	Chr27	45,236,411	45,236,488	1	1	0	0	1
881	INRA_BovSV881	deletion	72	Chr27	45,309,953	45,310,026	1	1	1	0	0
882	INRA_BovSV882	deletion	93	Chr28	166,162	166,256	1	1	0	0	1
883	INRA_BovSV883	deletion	379	Chr28	350,528	350,908	1	2	0	2	0
884	INRA_BovSV884	deletion	2,705,837	Chr28	1,688,518	4,394,356	1	1	0	0	1
885	INRA_BovSV885	deletion	2,716,746	Chr28	1,747,497	4,464,244	1	1	1	0	0
886	INRA_BovSV886	deletion	2,800,160	Chr28	1,777,556	4,577,717	1	1	0	1	0
887	INRA_BovSV887	deletion	2,715,882	Chr28	1,797,858	4,513,741	2	2	0	1	1
888	INRA_BovSV888	deletion	13,944	Chr28	2,270,733	2,284,678	1	3	3	0	0
889	INRA_BovSV889	deletion	1,853,748	Chr28	2,275,522	4,129,271	1	1	1	0	0
890	INRA_BovSV890	inversion	2,505	Chr23	47,529,854	47,532,360	1	1	1	0	0
891	INRA_BovSV891	inversion	1,774	Chr23	52,204,313	52,206,046	1	1	1	0	0
892	INRA_BovSV892	deletion	4,182	Chr28	4,440,735	4,444,918	1	1	1	0	0
893	INRA_BovSV893	deletion	2,684,890	Chr28	1,669,972	4,354,863	2	2	1	1	0
894	INRA_BovSV894	deletion	2,716,007	Chr28	1,794,072	4,510,080	1	1	0	0	1
895	INRA_BovSV895	inversion	1,070	Chr24	1,858,690	1,859,741	2	2	1	0	1
896	INRA_BovSV896	deletion	51,376	Chr28	2,374,773	2,426,150	2	3	2	0	1
897	INRA_BovSV897	deletion	140,123	Chr28	4,300,605	4,440,729	1	1	0	1	0
898	INRA_BovSV898	deletion	3,938	Chr28	5,750,882	5,754,821	1	1	0	1	0
899	INRA_BovSV899	deletion	152	Chr28	7,303,690	7,303,843	1	1	1	0	0
900	INRA_BovSV900	inversion	1,419	Chr24	5,757,389	5,758,803	1	1	1	0	0
901	INRA_BovSV901	deletion	67	Chr28	8,569,578	8,569,646	2	3	2	0	1
902	INRA_BovSV902	inversion	16,302	Chr24	6,433,168	6,449,471	1	1	1	0	0
903	INRA_BovSV903	deletion	110	Chr28	9,048,072	9,048,183	3	3	1	1	1
904	INRA_BovSV904	Tandem duplication	1,896,770	Chr17	50,564,658	52,461,429	1	1	0	0	1
905	INRA_BovSV905	inversion	795	Chr11	30,478,859	30,479,655	1	1	1	0	0
906	INRA_BovSV906	Tandem duplication	194,248	Chr17	50,611,043	50,805,292	1	1	0	0	1
907	INRA_BovSV907	inversion	1,615	Chr24	13,179,475	13,181,085	1	1	1	0	0
908	INRA_BovSV908	deletion	179	Chr28	15,276,340	15,276,520	3	15	5	4	6
909	INRA_BovSV909	deletion	2,902	Chr28	16,719,966	16,722,869	3	9	5	1	3
910	INRA_BovSV910	inversion	445,292	Chr24	14,056,405	14,501,698	1	1	0	1	0
911	INRA_BovSV911	inversion	7,116	Chr24	14,687,181	14,694,298	1	1	1	0	0
912	INRA_BovSV912	inversion	4,086	Chr24	10,934,305	10,938,392	1	2	2	0	0
913	INRA_BovSV913	deletion	52	Chr28	18,694,587	18,694,640	2	3	1	2	0
914	INRA_BovSV914	Tandem duplication	774,157	Chr17	50,763,878	51,538,036	3	9	1	4	4
915	INRA_BovSV915	Tandem duplication	774,175	Chr17	50,763,881	51,538,057	2	6	4	0	2
916	INRA_BovSV916	deletion	204	Chr28	20,003,480	20,003,685	3	9	6	1	2
917	INRA_BovSV917	deletion	64	Chr28	20,286,478	20,286,543	3	14	3	6	5
918	INRA_BovSV918	deletion	63	Chr28	20,286,514	20,286,578	2	2	0	1	1
919	INRA_BovSV919	inversion	1,751	Chr24	15,369,009	15,370,761	1	1	0	0	1
920	INRA_BovSV920	deletion	3,039	Chr28	21,897,379	21,900,419	2	2	1	0	1
921	INRA_BovSV921	deletion	27,314	Chr11	49,078,109	49,105,424	1	1	0	1	0
922	INRA_BovSV922	deletion	27,491	Chr11	49,080,251	49,107,743	1	1	1	0	0
923	INRA_BovSV923	inversion	3,087	Chr24	17,533,304	17,536,392	1	1	1	0	0
924	INRA_BovSV924	deletion	56	Chr28	24,903,993	24,904,050	2	2	1	0	1
925	INRA_BovSV925	deletion	76	Chr28	24,918,010	24,918,087	1	4	4	0	0
926	INRA_BovSV926	deletion	77	Chr28	24,918,065	24,918,143	2	6	5	1	0
927	INRA_BovSV927	deletion	85	Chr28	20,355,087	20,355,173	1	2	0	0	2
928	INRA_BovSV928	deletion	895	Chr28	20,864,965	20,865,861	1	1	0	0	1
929	INRA_BovSV929	inversion	5,724	Chr24	16,806,939	16,812,664	1	1	1	0	0
930	INRA_BovSV930	inversion	3,050	Chr24	17,114,783	17,117,834	1	1	1	0	0
931	INRA_BovSV931	deletion	80	Chr28	25,004,583	25,004,664	1	1	0	1	0
932	INRA_BovSV932	deletion	153	Chr28	25,122,019	25,122,173	3	35	15	9	11
933	INRA_BovSV933	deletion	147	Chr28	25,815,828	25,815,976	2	8	5	0	3
934	INRA_BovSV934	inversion	5,885	Chr24	20,284,928	20,290,814	1	1	1	0	0
935	INRA_BovSV935	inversion	13,163	Chr24	20,282,545	20,295,709	1	1	1	0	0
936	INRA_BovSV936	inversion	3,648	Chr24	20,403,709	20,407,358	1	1	1	0	0
937	INRA_BovSV937	deletion	122	Chr28	27,790,187	27,790,310	1	1	0	0	1
938	INRA_BovSV938	inversion	2,860	Chr24	22,005,161	22,008,022	1	1	1	0	0
939	INRA_BovSV939	inversion	11,683	Chr11	32,057,104	32,068,750	1	1	1	0	0
940	INRA_BovSV940	Tandem duplication	32,293	Chr17	50,805,586	50,837,880	1	2	0	2	0
941	INRA_BovSV941	inversion	11,307	Chr24	22,422,880	22,434,188	1	1	1	0	0
942	INRA_BovSV942	deletion	65	Chr11	50,879,360	50,879,426	1	1	1	0	0
943	INRA_BovSV943	inversion	7,222	Chr24	24,517,876	24,525,083	1	1	0	1	0
944	INRA_BovSV944	inversion	2,438	Chr24	20,578,711	20,581,150	1	1	1	0	0
945	INRA_BovSV945	Tandem duplication	32,292	Chr17	50,805,587	50,837,880	2	6	4	0	2
946	INRA_BovSV946	inversion	132,142	Chr24	24,567,781	24,699,924	3	3	1	1	1
947	INRA_BovSV947	Tandem duplication	32,289	Chr17	50,805,590	50,837,880	1	3	3	0	0
948	INRA_BovSV948	inversion	6,237	Chr24	27,523,649	27,529,887	1	1	0	0	1
949	INRA_BovSV949	inversion	6,251	Chr24	27,684,922	27,691,174	1	1	1	0	0
950	INRA_BovSV950	deletion	60	Chr28	35,204,072	35,204,133	1	1	1	0	0
951	INRA_BovSV951	inversion	6,809	Chr24	28,967,346	28,974,130	1	1	0	0	1
952	INRA_BovSV952	deletion	97,658	Chr28	35,592,427	35,690,086	2	2	1	0	1
953	INRA_BovSV953	deletion	180	Chr28	35,637,787	35,637,968	3	5	1	3	1
954	INRA_BovSV954	deletion	69,426	Chr28	35,670,880	35,740,307	2	2	0	1	1
955	INRA_BovSV955	deletion	48,047	Chr28	35,692,259	35,740,307	1	1	0	1	0
956	INRA_BovSV956	Tandem duplication	369,191	Chr17	50,827,293	51,196,485	1	2	0	2	0
957	INRA_BovSV957	inversion	7,940	Chr24	29,384,947	29,392,888	1	1	0	1	0
958	INRA_BovSV958	inversion	2,063	Chr24	29,587,984	29,590,048	1	1	0	1	0
959	INRA_BovSV959	deletion	73,048	Chr28	37,912,176	37,985,225	3	5	2	2	1
960	INRA_BovSV960	inversion	29,622	Chr24	28,422,064	28,451,687	1	1	0	1	0
961	INRA_BovSV961	inversion	7,104	Chr24	29,980,088	29,987,193	1	1	1	0	0
962	INRA_BovSV962	Tandem duplication	393,291	Chr17	51,162,716	51,556,008	3	4	2	1	1
963	INRA_BovSV963	inversion	6,623,898	Chr24	25,956,853	32,580,722	1	1	0	0	1
964	INRA_BovSV964	inversion	27,951	Chr24	30,464,501	30,492,437	1	1	0	0	1
965	INRA_BovSV965	inversion	2,045	Chr24	32,068,087	32,070,123	1	1	1	0	0
966	INRA_BovSV966	inversion	6,623,912	Chr24	25,956,836	32,580,749	1	1	0	0	1
967	INRA_BovSV967	Tandem duplication	190,588	Chr17	51,278,853	51,469,442	1	1	0	0	1
968	INRA_BovSV968	deletion	576	Chr28	40,874,937	40,875,514	1	1	0	1	0
969	INRA_BovSV969	inversion	11,259	Chr24	35,598,164	35,609,424	1	1	0	0	1
970	INRA_BovSV970	deletion	68	Chr28	41,633,509	41,633,578	1	1	0	1	0
971	INRA_BovSV971	deletion	55	Chr28	42,027,364	42,027,420	1	2	0	0	2
972	INRA_BovSV972	deletion	128,418	Chr28	42,421,523	42,549,942	1	1	1	0	0
973	INRA_BovSV973	deletion	96	Chr28	42,458,553	42,458,650	2	4	1	0	3
974	INRA_BovSV974	Tandem duplication	190,589	Chr17	51,278,853	51,469,443	1	6	0	6	0
975	INRA_BovSV975	deletion	133	Chr28	42,785,498	42,785,632	1	1	0	0	1
976	INRA_BovSV976	deletion	108	Chr28	44,025,448	44,025,557	1	1	1	0	0
977	INRA_BovSV977	deletion	55	Chr28	44,025,581	44,025,637	1	1	1	0	0
978	INRA_BovSV978	deletion	64	Chr28	44,510,800	44,510,865	2	5	4	0	1
979	INRA_BovSV979	inversion	2,330	Chr24	37,461,771	37,464,090	1	1	1	0	0
980	INRA_BovSV980	deletion	126,773	Chr28	42,409,043	42,535,817	1	1	1	0	0
981	INRA_BovSV981	deletion	939	Chr28	43,028,401	43,029,341	1	1	1	0	0
982	INRA_BovSV982	inversion	7,330	Chr24	35,321,576	35,328,907	1	1	1	0	0
983	INRA_BovSV983	deletion	88	Chr28	44,459,964	44,460,053	2	2	1	0	1
984	INRA_BovSV984	deletion	85	Chr28	44,510,825	44,510,911	1	2	2	0	0
985	INRA_BovSV985	deletion	80	Chr28	45,099,565	45,099,646	1	1	1	0	0
986	INRA_BovSV986	deletion	143	Chr28	45,113,078	45,113,222	1	3	3	0	0
987	INRA_BovSV987	inversion	1,743	Chr11	34,080,336	34,082,080	1	1	0	1	0
988	INRA_BovSV988	deletion	77	Chr28	45,286,542	45,286,620	1	1	0	0	1
989	INRA_BovSV989	deletion	99	Chr28	45,364,554	45,364,654	3	10	4	1	5
990	INRA_BovSV990	deletion	64	Chr28	45,460,072	45,460,137	1	1	1	0	0
991	INRA_BovSV991	deletion	65	Chr28	45,753,424	45,753,490	1	1	0	1	0
992	INRA_BovSV992	deletion	92	Chr28	46,127,854	46,127,947	1	1	0	0	1
993	INRA_BovSV993	deletion	98	Chr28	46,156,263	46,156,362	2	2	1	1	0
994	INRA_BovSV994	deletion	80	Chr29	903,671	903,752	1	1	0	1	0
995	INRA_BovSV995	deletion	52	Chr29	1,801,340	1,801,393	1	1	0	1	0
996	INRA_BovSV996	Tandem duplication	69,129	Chr17	51,459,196	51,528,326	1	2	2	0	0
997	INRA_BovSV997	inversion	5,297	Chr24	44,108,566	44,113,864	1	1	1	0	0
998	INRA_BovSV998	deletion	61	Chr29	4,898,869	4,898,931	1	1	0	0	1
999	INRA_BovSV999	Tandem duplication	13,329	Chr17	64,482,733	64,496,063	3	10	6	1	3
1000	INRA_BovSV1000	deletion	73	Chr29	4,062,992	4,063,066	1	1	1	0	0
1001	INRA_BovSV1001	deletion	1,751	Chr29	4,215,024	4,216,776	2	2	1	0	1
1002	INRA_BovSV1002	deletion	182,392	Chr29	5,309,351	5,491,744	1	1	1	0	0
1003	INRA_BovSV1003	deletion	179,618	Chr29	5,331,929	5,511,548	1	1	1	0	0
1004	INRA_BovSV1004	deletion	284,947	Chr29	5,461,160	5,746,108	2	2	1	0	1
1005	INRA_BovSV1005	deletion	2,840	Chr29	5,499,898	5,502,739	1	1	0	1	0
1006	INRA_BovSV1006	deletion	161,993	Chr29	5,561,759	5,723,753	2	3	2	1	0
1007	INRA_BovSV1007	deletion	14,413	Chr29	5,574,348	5,588,762	1	1	1	0	0
1008	INRA_BovSV1008	deletion	119,648	Chr29	5,595,919	5,715,568	1	1	0	0	1
1009	INRA_BovSV1009	inversion	14,700	Chr24	50,397,961	50,412,648	1	1	1	0	0
1010	INRA_BovSV1010	Tandem duplication	45,456	Chr17	71,622,501	71,667,958	3	7	3	3	1
1011	INRA_BovSV1011	inversion	6,115	Chr24	51,454,705	51,460,821	1	1	1	0	0
1012	INRA_BovSV1012	inversion	668	Chr24	51,613,261	51,613,916	1	1	1	0	0
1013	INRA_BovSV1013	deletion	70	Chr29	8,260,325	8,260,396	2	2	1	1	0
1014	INRA_BovSV1014	deletion	568,597	Chr29	9,211,189	9,779,787	3	42	19	13	10
1015	INRA_BovSV1015	deletion	4,137,724	Chr29	4,735,090	8,872,815	1	1	1	0	0
1016	INRA_BovSV1016	deletion	179,658	Chr29	5,333,329	5,512,988	2	3	2	0	1
1017	INRA_BovSV1017	deletion	547	Chr29	5,455,245	5,455,793	1	1	1	0	0
1018	INRA_BovSV1018	deletion	184,009	Chr29	5,538,749	5,722,759	1	1	0	0	1
1019	INRA_BovSV1019	deletion	2,279	Chr29	5,675,419	5,677,699	1	1	0	1	0
1020	INRA_BovSV1020	inversion	749	Chr24	55,023,202	55,023,930	1	1	1	0	0
1021	INRA_BovSV1021	inversion	12,256	Chr24	58,831,375	58,843,618	1	1	1	0	0
1022	INRA_BovSV1022	Tandem duplication	289,090	Chr17	72,666,019	72,955,110	2	2	1	1	0
1023	INRA_BovSV1023	deletion	146	Chr29	11,085,561	11,085,708	2	6	5	0	1
1024	INRA_BovSV1024	deletion	68	Chr29	11,540,763	11,540,832	1	1	0	1	0
1025	INRA_BovSV1025	deletion	137	Chr29	11,848,338	11,848,476	2	4	3	1	0
1026	INRA_BovSV1026	deletion	489	Chr29	12,845,622	12,846,112	3	34	15	9	10
1027	INRA_BovSV1027	inversion	7,992	Chr24	60,895,411	60,903,404	1	1	1	0	0
1028	INRA_BovSV1028	inversion	6,358	Chr24	62,557,198	62,563,557	1	1	0	0	1
1029	INRA_BovSV1029	deletion	7,571	Chr29	13,760,828	13,768,400	3	16	5	6	5
1030	INRA_BovSV1030	deletion	3,676	Chr29	13,872,631	13,876,308	1	1	1	0	0
1031	INRA_BovSV1031	deletion	6,379	Chr29	14,065,970	14,072,350	3	10	6	1	3
1032	INRA_BovSV1032	inversion	348,782	Chr25	1,224,121	1,572,904	1	2	0	2	0
1033	INRA_BovSV1033	inversion	17,042	Chr11	30,131,822	30,148,865	1	1	1	0	0
1034	INRA_BovSV1034	deletion	7,572	Chr29	13,760,828	13,768,401	1	1	0	1	0
1035	INRA_BovSV1035	Tandem duplication	4,477	Chr18	10,711,750	10,716,228	3	7	2	3	2
1036	INRA_BovSV1036	deletion	671	Chr11	50,234,224	50,234,896	2	3	1	2	0
1037	INRA_BovSV1037	Tandem duplication	16,418	Chr18	15,297,237	15,313,656	1	1	0	0	1
1038	INRA_BovSV1038	inversion	11,938	Chr25	9,258,499	9,270,438	1	1	0	0	1
1039	INRA_BovSV1039	inversion	11,503	Chr11	32,057,162	32,068,666	1	1	1	0	0
1040	INRA_BovSV1040	deletion	246	Chr29	17,885,608	17,885,855	3	21	13	4	4
1041	INRA_BovSV1041	deletion	4,646	Chr29	19,210,947	19,215,594	1	2	0	0	2
1042	INRA_BovSV1042	deletion	72	Chr29	19,217,629	19,217,702	2	5	2	0	3
1043	INRA_BovSV1043	deletion	103,007	Chr29	19,256,086	19,359,094	3	6	1	2	3
1044	INRA_BovSV1044	inversion	2,975	Chr25	10,382,962	10,385,938	1	1	1	0	0
1045	INRA_BovSV1045	inversion	201,318	Chr25	10,755,728	10,957,005	2	4	1	0	3
1046	INRA_BovSV1046	inversion	11,310	Chr25	11,072,830	11,084,141	1	1	1	0	0
1047	INRA_BovSV1047	inversion	44,163	Chr25	11,336,581	11,380,745	1	1	0	1	0
1048	INRA_BovSV1048	inversion	3,323	Chr25	11,785,430	11,788,752	2	2	1	1	0
1049	INRA_BovSV1049	inversion	2,400	Chr11	33,596,514	33,598,915	1	1	1	0	0
1050	INRA_BovSV1050	inversion	2,857,838	Chr25	14,260,484	17,118,287	2	2	1	1	0
1051	INRA_BovSV1051	deletion	5,634	Chr29	21,829,537	21,835,172	3	8	5	1	2
1052	INRA_BovSV1052	inversion	11,958	Chr25	17,099,781	17,111,740	1	1	1	0	0
1053	INRA_BovSV1053	inversion	9,647	Chr11	33,804,757	33,814,405	1	1	1	0	0
1054	INRA_BovSV1054	inversion	2,795	Chr11	34,488,569	34,491,365	1	1	0	1	0
1055	INRA_BovSV1055	deletion	58	Chr29	24,978,368	24,978,427	1	1	0	1	0
1056	INRA_BovSV1056	inversion	2,618	Chr25	18,014,386	18,017,005	1	1	0	0	1
1057	INRA_BovSV1057	deletion	64,038	Chr29	21,192,554	21,256,593	2	2	0	1	1
1058	INRA_BovSV1058	Tandem duplication	222,209	Chr18	50,880,115	51,102,325	2	4	1	0	3
1059	INRA_BovSV1059	deletion	62	Chr29	25,933,891	25,933,954	1	1	0	0	1
1060	INRA_BovSV1060	inversion	7,992	Chr11	34,596,609	34,604,602	1	1	0	1	0
1061	INRA_BovSV1061	Tandem duplication	222,141	Chr18	50,884,127	51,106,269	1	1	1	0	0
1062	INRA_BovSV1062	inversion	9,125	Chr25	22,309,502	22,318,628	1	1	0	1	0
1063	INRA_BovSV1063	deletion	10,777	Chr29	27,150,996	27,161,774	1	1	0	0	1
1064	INRA_BovSV1064	deletion	81	Chr29	27,240,746	27,240,828	2	3	0	2	1
1065	INRA_BovSV1065	deletion	27,578	Chr29	27,794,847	27,822,426	3	15	5	4	6
1066	INRA_BovSV1066	deletion	68	Chr29	28,012,499	28,012,568	1	1	1	0	0
1067	INRA_BovSV1067	deletion	14,877	Chr29	28,367,421	28,382,299	2	4	0	3	1
1068	INRA_BovSV1068	deletion	51	Chr29	28,479,763	28,479,815	1	4	4	0	0
1069	INRA_BovSV1069	Tandem duplication	222,152	Chr18	50,884,127	51,106,280	1	1	1	0	0
1070	INRA_BovSV1070	inversion	5,363	Chr25	23,378,612	23,383,976	1	1	1	0	0
1071	INRA_BovSV1071	Tandem duplication	7,053	Chr18	50,890,179	50,897,233	3	26	4	11	11
1072	INRA_BovSV1072	deletion	314,572	Chr29	27,301,528	27,616,101	1	1	1	0	0
1073	INRA_BovSV1073	deletion	172,484	Chr29	27,673,747	27,846,232	1	1	1	0	0
1074	INRA_BovSV1074	inversion	64,863	Chr25	27,258,247	27,323,111	1	2	0	0	2
1075	INRA_BovSV1075	deletion	235,413	Chr29	27,738,600	27,974,014	1	1	0	0	1
1076	INRA_BovSV1076	Tandem duplication	1,688,747	Chr10	23,333,757	25,022,505	1	2	0	0	2
1077	INRA_BovSV1077	deletion	19,179	Chr29	30,235,942	30,255,122	3	15	7	4	4
1078	INRA_BovSV1078	deletion	109,749	Chr29	30,246,535	30,356,285	2	2	1	1	0
1079	INRA_BovSV1079	deletion	3,627	Chr29	30,251,470	30,255,098	3	24	11	5	8
1080	INRA_BovSV1080	deletion	113	Chr29	30,276,087	30,276,201	1	1	0	0	1
1081	INRA_BovSV1081	deletion	137	Chr29	30,276,213	30,276,351	2	3	2	0	1
1082	INRA_BovSV1082	deletion	67	Chr29	30,288,667	30,288,735	3	13	1	4	8
1083	INRA_BovSV1083	deletion	68	Chr29	30,289,145	30,289,214	3	4	1	2	1
1084	INRA_BovSV1084	deletion	259	Chr29	30,302,370	30,302,630	1	1	0	0	1
1085	INRA_BovSV1085	deletion	1,409	Chr29	30,338,901	30,340,311	3	20	9	8	3
1086	INRA_BovSV1086	deletion	2,129	Chr29	30,362,340	30,364,470	2	4	3	0	1
1087	INRA_BovSV1087	Tandem duplication	123,454	Chr18	50,937,897	51,061,352	1	1	1	0	0
1088	INRA_BovSV1088	deletion	18,210	Chr29	30,254,939	30,273,150	1	1	0	1	0
1089	INRA_BovSV1089	inversion	1,579	Chr25	32,325,779	32,327,359	1	1	0	0	1
1090	INRA_BovSV1090	inversion	1,447	Chr25	32,325,864	32,327,312	1	1	1	0	0
1091	INRA_BovSV1091	deletion	1,670	Chr29	30,330,990	30,332,661	1	1	0	0	1
1092	INRA_BovSV1092	deletion	25,011	Chr29	30,341,935	30,366,947	1	1	0	0	1
1093	INRA_BovSV1093	inversion	1,509	Chr25	34,331,414	34,332,924	1	1	0	0	1
1094	INRA_BovSV1094	Tandem duplication	15,348	Chr18	50,976,208	50,991,557	1	1	1	0	0
1095	INRA_BovSV1095	Tandem duplication	15,338	Chr18	50,976,617	50,991,956	3	6	2	2	2
1096	INRA_BovSV1096	deletion	87	Chr29	35,497,201	35,497,289	2	2	0	1	1
1097	INRA_BovSV1097	inversion	1,407,071	Chr25	38,150,131	39,557,193	1	1	1	0	0
1098	INRA_BovSV1098	deletion	18,630	Chr29	36,593,793	36,612,424	1	3	3	0	0
1099	INRA_BovSV1099	deletion	230	Chr29	36,692,853	36,693,084	1	1	0	1	0
1100	INRA_BovSV1100	deletion	76	Chr29	36,693,203	36,693,280	1	1	0	1	0
1101	INRA_BovSV1101	inversion	448	Chr25	38,978,513	38,978,962	1	1	0	0	1
1102	INRA_BovSV1102	deletion	85	Chr29	36,885,683	36,885,769	1	1	0	1	0
1103	INRA_BovSV1103	inversion	4,255,698	Chr11	31,728,419	35,984,100	1	2	0	2	0
1104	INRA_BovSV1104	Tandem duplication	15,345	Chr18	50,976,617	50,991,963	2	3	0	1	2
1105	INRA_BovSV1105	deletion	52	Chr11	55,309,315	55,309,368	1	2	0	0	2
1106	INRA_BovSV1106	deletion	154,227	Chr29	38,389,939	38,544,167	1	1	1	0	0
1107	INRA_BovSV1107	deletion	937,281	Chr29	38,587,477	39,524,759	2	3	1	0	2
1108	INRA_BovSV1108	inversion	954	Chr25	36,748,145	36,749,100	1	1	0	0	1
1109	INRA_BovSV1109	deletion	285,776	Chr29	38,645,736	38,931,513	1	1	0	0	1
1110	INRA_BovSV1110	deletion	64	Chr29	38,650,186	38,650,251	1	1	1	0	0
1111	INRA_BovSV1111	deletion	1,005,286	Chr29	38,695,619	39,700,906	2	4	3	1	0
1112	INRA_BovSV1112	deletion	143	Chr29	38,703,364	38,703,508	3	13	7	4	2
1113	INRA_BovSV1113	deletion	27,899	Chr29	38,704,968	38,732,868	1	1	0	0	1
1114	INRA_BovSV1114	deletion	467,018	Chr29	38,801,967	39,268,986	1	5	5	0	0
1115	INRA_BovSV1115	deletion	266,098	Chr29	38,899,703	39,165,802	2	4	1	0	3
1116	INRA_BovSV1116	deletion	195,830	Chr29	39,238,706	39,434,537	1	3	3	0	0
1117	INRA_BovSV1117	deletion	195,829	Chr29	39,238,707	39,434,537	1	1	0	0	1
1118	INRA_BovSV1118	deletion	196,699	Chr29	39,247,974	39,444,674	1	3	0	0	3
1119	INRA_BovSV1119	deletion	169,444	Chr29	39,259,751	39,429,196	1	1	0	0	1
1120	INRA_BovSV1120	deletion	196,639	Chr29	39,279,854	39,476,494	3	8	6	1	1
1121	INRA_BovSV1121	deletion	195,719	Chr29	39,293,235	39,488,955	2	3	2	0	1
1122	INRA_BovSV1122	deletion	202,873	Chr29	39,521,663	39,724,537	2	7	5	2	0
1123	INRA_BovSV1123	deletion	187,728	Chr29	39,592,835	39,780,564	2	2	1	0	1
1124	INRA_BovSV1124	deletion	187,045	Chr29	39,602,063	39,789,109	1	1	0	1	0
1125	INRA_BovSV1125	deletion	208,730	Chr29	39,633,959	39,842,690	3	6	1	4	1
1126	INRA_BovSV1126	deletion	293,927	Chr29	39,647,464	39,941,392	3	8	3	3	2
1127	INRA_BovSV1127	deletion	1,855	Chr29	36,583,587	36,585,443	1	3	3	0	0
1128	INRA_BovSV1128	Tandem duplication	108,078	Chr18	51,001,845	51,109,924	2	5	2	0	3
1129	INRA_BovSV1129	deletion	35,516	Chr29	38,369,851	38,405,368	1	1	0	1	0
1130	INRA_BovSV1130	deletion	27,579	Chr29	38,565,914	38,593,494	2	2	1	1	0
1131	INRA_BovSV1131	deletion	48,824	Chr29	38,572,105	38,620,930	1	1	0	0	1
1132	INRA_BovSV1132	deletion	288,857	Chr29	38,778,873	39,067,731	1	1	0	0	1
1133	INRA_BovSV1133	deletion	86,509	Chr29	38,913,683	39,000,193	2	2	1	0	1
1134	INRA_BovSV1134	deletion	39,578	Chr29	39,040,467	39,080,046	1	2	2	0	0
1135	INRA_BovSV1135	inversion	281,586	Chr26	4,639	286,204	1	2	0	2	0
1136	INRA_BovSV1136	deletion	74,781	Chr29	39,134,407	39,209,189	1	2	2	0	0
1137	INRA_BovSV1137	deletion	555,195	Chr29	39,139,779	39,694,975	1	1	0	1	0
1138	INRA_BovSV1138	Tandem duplication	108,081	Chr18	51,002,075	51,110,157	1	1	1	0	0
1139	INRA_BovSV1139	deletion	300,020	Chr29	39,337,704	39,637,725	1	1	1	0	0
1140	INRA_BovSV1140	deletion	205,881	Chr29	39,638,309	39,844,191	1	2	0	2	0
1141	INRA_BovSV1141	deletion	185,006	Chr29	39,792,900	39,977,907	1	1	1	0	0
1142	INRA_BovSV1142	deletion	69,846	Chr29	40,003,870	40,073,717	3	8	1	4	3
1143	INRA_BovSV1143	deletion	62	Chr29	40,336,059	40,336,122	1	2	2	0	0
1144	INRA_BovSV1144	deletion	29,236	Chr29	40,362,862	40,392,099	1	1	1	0	0
1145	INRA_BovSV1145	deletion	29,236	Chr29	40,362,863	40,392,100	3	24	8	5	11
1146	INRA_BovSV1146	deletion	138	Chr29	41,325,693	41,325,832	2	2	1	1	0
1147	INRA_BovSV1147	deletion	290	Chr29	41,325,749	41,326,040	1	1	1	0	0
1148	INRA_BovSV1148	deletion	185	Chr29	41,325,762	41,325,948	2	4	0	3	1
1149	INRA_BovSV1149	deletion	150	Chr29	41,325,889	41,326,040	1	1	0	1	0
1150	INRA_BovSV1150	Tandem duplication	108,133	Chr18	51,003,582	51,111,716	2	3	0	1	2
1151	INRA_BovSV1151	Tandem duplication	719,730	Chr10	22,300,321	23,020,052	1	1	0	0	1
1152	INRA_BovSV1152	deletion	54,426	Chr29	42,479,296	42,533,723	1	2	2	0	0
1153	INRA_BovSV1153	deletion	60,423	Chr29	42,510,281	42,570,705	1	1	1	0	0
1154	INRA_BovSV1154	deletion	99	Chr29	44,069,386	44,069,486	1	1	0	1	0
1155	INRA_BovSV1155	deletion	82	Chr29	44,594,446	44,594,529	2	2	1	0	1
1156	INRA_BovSV1156	deletion	2,944,718	Chr29	39,504,486	42,449,205	1	1	0	0	1
1157	INRA_BovSV1157	deletion	1,824	Chr29	41,308,562	41,310,387	1	1	1	0	0
1158	INRA_BovSV1158	inversion	4,955	Chr26	3,032,501	3,037,457	1	1	1	0	0
1159	INRA_BovSV1159	deletion	54,544	Chr29	42,474,500	42,529,045	1	2	0	2	0
1160	INRA_BovSV1160	deletion	54,480	Chr29	42,478,747	42,533,228	1	1	1	0	0
1161	INRA_BovSV1161	deletion	54,150	Chr29	42,482,243	42,536,394	1	1	1	0	0
1162	INRA_BovSV1162	inversion	2,059	Chr26	3,362,796	3,364,856	1	2	2	0	0
1163	INRA_BovSV1163	Tandem duplication	39,994	Chr18	51,739,512	51,779,507	1	1	1	0	0
1164	INRA_BovSV1164	inversion	1,565	Chr26	4,873,478	4,875,044	1	1	1	0	0
1165	INRA_BovSV1165	deletion	829	Chr29	47,101,690	47,102,520	2	4	0	2	2
1166	INRA_BovSV1166	inversion	284,902	Chr26	1,765	286,668	1	1	0	0	1
1167	INRA_BovSV1167	inversion	284,504	Chr26	2,553	287,058	1	1	0	1	0
1168	INRA_BovSV1168	deletion	83	Chr29	48,565,227	48,565,311	1	1	1	0	0
1169	INRA_BovSV1169	deletion	83	Chr29	48,565,251	48,565,335	1	1	0	0	1
1170	INRA_BovSV1170	deletion	128	Chr29	49,198,488	49,198,617	3	4	1	2	1
1171	INRA_BovSV1171	inversion	71,651	Chr26	1,719,805	1,791,457	1	1	1	0	0
1172	INRA_BovSV1172	Tandem duplication	21,640	Chr18	51,749,539	51,771,180	1	1	0	0	1
1173	INRA_BovSV1173	deletion	61	Chr29	48,620,161	48,620,223	1	1	0	0	1
1174	INRA_BovSV1174	deletion	67	Chr29	50,719,947	50,720,015	2	6	4	0	2
1175	INRA_BovSV1175	inversion	33,123	Chr26	4,138,441	4,171,565	1	1	0	1	0
1176	INRA_BovSV1176	deletion	54	Chr29	51,053,915	51,053,970	1	1	0	1	0
1177	INRA_BovSV1177	inversion	1,718	Chr26	4,376,116	4,377,835	1	1	0	1	0
1178	INRA_BovSV1178	inversion	5,686	Chr26	4,705,330	4,711,017	1	1	1	0	0
1179	INRA_BovSV1179	inversion	2,128	Chr26	4,873,130	4,875,259	1	1	0	1	0
1180	INRA_BovSV1180	inversion	5,647	Chr26	5,155,793	5,161,441	1	2	0	0	2
1181	INRA_BovSV1181	inversion	862	Chr26	5,356,437	5,357,300	1	1	1	0	0
1182	INRA_BovSV1182	inversion	6,171	Chr26	5,656,370	5,662,542	1	1	0	0	1
1183	INRA_BovSV1183	Tandem duplication	18,425	Chr18	51,759,837	51,778,263	1	1	1	0	0
1184	INRA_BovSV1184	deletion	330	Chr2	4,088,976	4,089,307	3	20	9	6	5
1185	INRA_BovSV1185	deletion	485	Chr2	4,160,871	4,161,357	1	1	0	1	0
1186	INRA_BovSV1186	deletion	81	Chr2	4,160,965	4,161,047	1	1	1	0	0
1187	INRA_BovSV1187	inversion	2,868	Chr26	6,392,318	6,395,187	1	1	1	0	0
1188	INRA_BovSV1188	inversion	50,969	Chr26	6,836,798	6,887,768	1	1	1	0	0
1189	INRA_BovSV1189	deletion	1,243	Chr2	5,300,754	5,301,998	3	6	2	3	1
1190	INRA_BovSV1190	inversion	57,631	Chr26	9,063,980	9,121,612	1	1	1	0	0
1191	INRA_BovSV1191	deletion	132	Chr2	5,973,106	5,973,239	2	3	2	0	1
1192	INRA_BovSV1192	inversion	174,314	Chr26	7,529,386	7,703,701	2	2	0	1	1
1193	INRA_BovSV1193	deletion	63	Chr2	8,598,490	8,598,554	1	1	1	0	0
1194	INRA_BovSV1194	inversion	4,446	Chr26	8,650,176	8,654,623	1	1	0	1	0
1195	INRA_BovSV1195	deletion	136	Chr2	7,761,690	7,761,827	1	2	2	0	0
1196	INRA_BovSV1196	Tandem duplication	17,823	Chr18	52,111,597	52,129,421	3	5	1	1	3
1197	INRA_BovSV1197	inversion	2,624	Chr26	12,141,119	12,143,732	1	1	1	0	0
1198	INRA_BovSV1198	inversion	2,632	Chr26	12,465,343	12,467,976	1	1	0	1	0
1199	INRA_BovSV1199	deletion	143	Chr2	11,916,509	11,916,653	1	1	1	0	0
1200	INRA_BovSV1200	inversion	13,187	Chr26	14,098,818	14,112,006	1	1	1	0	0
1201	INRA_BovSV1201	Tandem duplication	3,171	Chr18	57,566,016	57,569,188	3	30	11	12	7
1202	INRA_BovSV1202	deletion	14,854	Chr2	13,105,096	13,119,951	1	1	0	1	0
1203	INRA_BovSV1203	inversion	7,720	Chr26	10,927,591	10,935,312	1	1	1	0	0
1204	INRA_BovSV1204	inversion	2,646	Chr26	12,465,328	12,467,975	1	1	1	0	0
1205	INRA_BovSV1205	Tandem duplication	3,164	Chr18	57,567,450	57,570,615	3	48	19	15	14
1206	INRA_BovSV1206	inversion	1,760	Chr26	15,161,321	15,163,082	2	2	1	1	0
1207	INRA_BovSV1207	inversion	1,853	Chr26	16,292,157	16,294,003	1	1	1	0	0
1208	INRA_BovSV1208	inversion	1,184	Chr26	17,970,759	17,971,944	3	3	1	1	1
1209	INRA_BovSV1209	deletion	281	Chr2	17,478,119	17,478,401	2	2	1	0	1
1210	INRA_BovSV1210	deletion	1,210,517	Chr2	17,596,667	18,807,185	3	8	3	2	3
1211	INRA_BovSV1211	deletion	76	Chr2	19,070,695	19,070,772	1	1	1	0	0
1212	INRA_BovSV1212	inversion	6,044	Chr26	21,069,931	21,075,976	2	3	2	0	1
1213	INRA_BovSV1213	inversion	2,073	Chr26	22,706,804	22,708,878	2	2	1	0	1
1214	INRA_BovSV1214	Tandem duplication	74,945	Chr18	58,309,844	58,384,790	2	4	0	3	1
1215	INRA_BovSV1215	inversion	1,626	Chr26	24,093,887	24,095,514	1	1	1	0	0
1216	INRA_BovSV1216	inversion	4,110	Chr26	20,573,584	20,577,695	1	1	1	0	0
1217	INRA_BovSV1217	Tandem duplication	74,941	Chr18	58,309,848	58,384,790	1	1	0	1	0
1218	INRA_BovSV1218	deletion	102,850	Chr2	21,408,058	21,510,909	3	14	7	2	5
1219	INRA_BovSV1219	Tandem duplication	109,779	Chr18	58,744,191	58,853,971	2	3	2	1	0
1220	INRA_BovSV1220	deletion	139	Chr2	24,441,931	24,442,071	1	1	0	1	0
1221	INRA_BovSV1221	inversion	148,944	Chr26	26,976,059	27,124,924	1	1	1	0	0
1222	INRA_BovSV1222	inversion	1,255	Chr26	27,100,985	27,102,241	1	1	0	0	1
1223	INRA_BovSV1223	deletion	1,904	Chr2	24,575,221	24,577,126	1	2	0	0	2
1224	INRA_BovSV1224	deletion	88	Chr2	25,415,272	25,415,361	2	2	0	1	1
1225	INRA_BovSV1225	inversion	10,757	Chr26	29,508,981	29,519,739	1	1	1	0	0
1226	INRA_BovSV1226	inversion	876	Chr26	29,984,814	29,985,655	1	2	2	0	0
1227	INRA_BovSV1227	deletion	482,678	Chr2	27,675,185	28,157,864	2	3	1	0	2
1228	INRA_BovSV1228	inversion	8,658	Chr26	28,164,147	28,172,806	1	1	1	0	0
1229	INRA_BovSV1229	inversion	9,128	Chr26	29,167,188	29,176,317	1	1	0	1	0
1230	INRA_BovSV1230	inversion	2,547	Chr26	30,618,931	30,621,479	1	1	0	0	1
1231	INRA_BovSV1231	inversion	674	Chr26	33,124,756	33,125,423	1	1	1	0	0
1232	INRA_BovSV1232	deletion	53	Chr2	33,684,700	33,684,754	2	4	3	1	0
1233	INRA_BovSV1233	inversion	1,598	Chr26	32,378,900	32,380,499	1	1	1	0	0
1234	INRA_BovSV1234	deletion	1,479,906	Chr2	32,257,140	33,737,047	2	2	1	0	1
1235	INRA_BovSV1235	inversion	2,558	Chr26	35,776,671	35,779,230	1	1	0	1	0
1236	INRA_BovSV1236	deletion	593	Chr2	36,019,204	36,019,798	1	1	0	0	1
1237	INRA_BovSV1237	inversion	373	Chr11	39,530,959	39,531,333	1	1	0	0	1
1238	INRA_BovSV1238	deletion	59	Chr2	39,058,121	39,058,181	1	1	0	1	0
1239	INRA_BovSV1239	Tandem duplication	274,920	Chr18	59,298,943	59,573,864	3	14	7	5	2
1240	INRA_BovSV1240	Tandem duplication	109,356	Chr18	59,339,028	59,448,385	1	8	8	0	0
1241	INRA_BovSV1241	inversion	4,960	Chr26	47,302,190	47,307,151	1	1	1	0	0
1242	INRA_BovSV1242	deletion	66	Chr2	43,640,724	43,640,791	3	7	4	2	1
1243	INRA_BovSV1243	Tandem duplication	245,832	Chr18	59,435,952	59,681,785	1	1	0	0	1
1244	INRA_BovSV1244	inversion	672,969	Chr26	50,308,521	50,981,491	1	1	0	1	0
1245	INRA_BovSV1245	Tandem duplication	39,721	Chr18	59,522,170	59,561,892	2	3	0	1	2
1246	INRA_BovSV1246	deletion	4,807	Chr2	45,739,413	45,744,221	1	1	0	1	0
1247	INRA_BovSV1247	deletion	110	Chr2	47,710,361	47,710,472	1	1	1	0	0
1248	INRA_BovSV1248	inversion	5,180	Chr27	3,913,681	3,918,828	1	1	0	1	0
1249	INRA_BovSV1249	inversion	918,656	Chr27	140,738	1,059,395	2	2	1	0	1
1250	INRA_BovSV1250	Tandem duplication	178,187	Chr18	59,765,306	59,943,494	3	5	2	1	2
1251	INRA_BovSV1251	inversion	884,534	Chr27	157,040	1,041,575	1	1	0	0	1
1252	INRA_BovSV1252	inversion	869,074	Chr27	164,431	1,033,506	1	1	1	0	0
1253	INRA_BovSV1253	deletion	20,136	Chr2	50,515,926	50,536,063	2	4	2	0	2
1254	INRA_BovSV1254	inversion	914,190	Chr27	4,861,306	5,775,487	1	1	0	1	0
1255	INRA_BovSV1255	deletion	3,132,430	Chr2	51,660,764	54,793,195	1	1	0	0	1
1256	INRA_BovSV1256	inversion	220,985	Chr27	5,260,954	5,481,920	1	1	1	0	0
1257	INRA_BovSV1257	inversion	317,979	Chr27	5,234,214	5,552,194	1	1	0	0	1
1258	INRA_BovSV1258	inversion	310,876	Chr27	5,275,427	5,586,304	1	1	1	0	0
1259	INRA_BovSV1259	inversion	290,350	Chr27	5,320,983	5,611,334	1	1	0	1	0
1260	INRA_BovSV1260	inversion	2,139	Chr27	5,785,211	5,787,351	1	1	1	0	0
1261	INRA_BovSV1261	Tandem duplication	103,433	Chr18	60,046,447	60,149,881	1	1	1	0	0
1262	INRA_BovSV1262	deletion	85	Chr2	55,962,231	55,962,317	1	1	1	0	0
1263	INRA_BovSV1263	deletion	85	Chr2	55,962,286	55,962,372	1	1	1	0	0
1264	INRA_BovSV1264	inversion	839	Chr27	8,501,525	8,502,365	1	1	1	0	0
1265	INRA_BovSV1265	inversion	1,644	Chr27	8,865,990	8,867,621	2	2	0	1	1
1266	INRA_BovSV1266	Tandem duplication	86,907	Chr18	60,551,695	60,638,603	1	2	2	0	0
1267	INRA_BovSV1267	deletion	5,756	Chr2	57,403,169	57,408,926	1	1	0	0	1
1268	INRA_BovSV1268	deletion	9,481	Chr2	57,407,733	57,417,215	3	7	4	1	2
1269	INRA_BovSV1269	inversion	4,116	Chr27	9,857,870	9,861,983	1	1	1	0	0
1270	INRA_BovSV1270	inversion	306,601	Chr27	5,078,057	5,384,659	1	1	1	0	0
1271	INRA_BovSV1271	inversion	302,653	Chr27	5,080,426	5,383,080	1	1	1	0	0
1272	INRA_BovSV1272	deletion	95	Chr11	62,009,730	62,009,826	1	2	0	0	2
1273	INRA_BovSV1273	Tandem duplication	227,602	Chr18	60,587,326	60,814,929	3	10	6	2	2
1274	INRA_BovSV1274	inversion	301,588	Chr27	5,124,910	5,426,499	1	1	0	1	0
1275	INRA_BovSV1275	inversion	256,856	Chr27	5,227,229	5,484,086	1	1	1	0	0
1276	INRA_BovSV1276	inversion	266,390	Chr27	5,240,030	5,506,421	1	1	1	0	0
1277	INRA_BovSV1277	inversion	301,601	Chr27	5,247,559	5,549,161	1	1	0	0	1
1278	INRA_BovSV1278	Tandem duplication	227,598	Chr18	60,587,330	60,814,929	2	4	2	0	2
1279	INRA_BovSV1279	inversion	1,212,082	Chr27	5,256,773	6,468,856	1	1	1	0	0
1280	INRA_BovSV1280	inversion	241,908	Chr27	5,259,172	5,501,081	2	2	1	0	1
1281	INRA_BovSV1281	deletion	48,651	Chr2	60,476,158	60,524,810	1	1	1	0	0
1282	INRA_BovSV1282	inversion	2,526	Chr27	5,323,711	5,326,238	1	1	1	0	0
1283	INRA_BovSV1283	deletion	78	Chr2	61,833,790	61,833,869	1	1	1	0	0
1284	INRA_BovSV1284	Tandem duplication	94,951	Chr18	60,590,857	60,685,809	1	1	1	0	0
1285	INRA_BovSV1285	inversion	422,890	Chr27	5,781,032	6,203,923	1	1	1	0	0
1286	INRA_BovSV1286	deletion	1,329	Chr11	63,185,704	63,187,034	2	5	4	1	0
1287	INRA_BovSV1287	inversion	6,869	Chr11	41,803,156	41,810,026	1	1	1	0	0
1288	INRA_BovSV1288	inversion	253,606	Chr27	5,918,336	6,171,943	1	1	1	0	0
1289	INRA_BovSV1289	inversion	67,863	Chr27	6,165,552	6,233,416	1	1	1	0	0
1290	INRA_BovSV1290	deletion	3,790	Chr2	65,544,370	65,548,161	1	1	0	1	0
1291	INRA_BovSV1291	inversion	30,898	Chr27	7,291,009	7,321,908	1	2	0	0	2
1292	INRA_BovSV1292	deletion	2,325	Chr11	63,382,629	63,384,955	1	2	0	2	0
1293	INRA_BovSV1293	inversion	17,280	Chr27	9,073,841	9,091,122	1	1	1	0	0
1294	INRA_BovSV1294	inversion	24,916	Chr27	9,884,662	9,909,579	1	1	1	0	0
1295	INRA_BovSV1295	inversion	1,515	Chr27	13,028,548	13,030,064	1	1	1	0	0
1296	INRA_BovSV1296	Tandem duplication	34,625	Chr18	60,675,971	60,710,597	1	1	0	0	1
1297	INRA_BovSV1297	inversion	3,668	Chr27	12,856,154	12,859,823	1	1	0	0	1
1298	INRA_BovSV1298	Tandem duplication	8,794	Chr18	60,779,857	60,788,652	2	4	2	0	2
1299	INRA_BovSV1299	deletion	53	Chr2	70,634,599	70,634,653	1	1	1	0	0
1300	INRA_BovSV1300	deletion	87	Chr2	71,026,319	71,026,407	3	4	2	1	1
1301	INRA_BovSV1301	inversion	1,170	Chr27	15,809,168	15,810,339	1	1	0	0	1
1302	INRA_BovSV1302	inversion	13,075	Chr27	17,024,066	17,037,142	1	1	1	0	0
1303	INRA_BovSV1303	Tandem duplication	58,039	Chr18	60,870,878	60,928,918	1	1	1	0	0
1304	INRA_BovSV1304	inversion	2,210	Chr27	17,692,002	17,694,211	1	1	0	0	1
1305	INRA_BovSV1305	inversion	750	Chr27	19,438,262	19,438,991	1	1	1	0	0
1306	INRA_BovSV1306	Tandem duplication	30,350	Chr18	60,878,553	60,908,904	1	2	2	0	0
1307	INRA_BovSV1307	inversion	7,846	Chr27	16,486,098	16,493,945	1	1	0	1	0
1308	INRA_BovSV1308	deletion	70	Chr2	76,169,897	76,169,968	2	2	1	0	1
1309	INRA_BovSV1309	deletion	214	Chr2	76,814,915	76,815,130	1	2	2	0	0
1310	INRA_BovSV1310	inversion	1,051	Chr11	42,887,442	42,888,494	1	1	1	0	0
1311	INRA_BovSV1311	deletion	432	Chr2	75,820,905	75,821,338	3	4	1	2	1
1312	INRA_BovSV1312	Tandem duplication	26,277	Chr18	60,902,494	60,928,772	1	1	0	1	0
1313	INRA_BovSV1313	inversion	6,427	Chr27	23,107,474	23,113,860	1	1	1	0	0
1314	INRA_BovSV1314	inversion	1,380	Chr27	23,696,940	23,698,321	1	1	0	1	0
1315	INRA_BovSV1315	Tandem duplication	308,190	Chr18	61,250,931	61,559,122	2	2	1	1	0
1316	INRA_BovSV1316	deletion	321	Chr2	82,520,402	82,520,724	2	2	1	1	0
1317	INRA_BovSV1317	inversion	4,132	Chr27	25,602,760	25,606,869	1	1	0	0	1
1318	INRA_BovSV1318	inversion	13,558	Chr27	27,455,472	27,469,023	1	1	1	0	0
1319	INRA_BovSV1319	inversion	613	Chr27	28,262,030	28,262,642	1	1	1	0	0
1320	INRA_BovSV1320	deletion	402	Chr2	88,388,427	88,388,830	1	1	1	0	0
1321	INRA_BovSV1321	Tandem duplication	76,805	Chr18	61,307,675	61,384,481	3	5	2	2	1
1322	INRA_BovSV1322	inversion	2,904	Chr27	30,301,153	30,304,058	1	1	0	1	0
1323	INRA_BovSV1323	inversion	14,083	Chr27	31,914,210	31,928,294	1	1	1	0	0
1324	INRA_BovSV1324	deletion	51	Chr2	91,759,711	91,759,763	1	1	1	0	0
1325	INRA_BovSV1325	deletion	67	Chr2	92,057,156	92,057,224	2	2	1	0	1
1326	INRA_BovSV1326	deletion	64	Chr2	93,789,669	93,789,734	1	1	1	0	0
1327	INRA_BovSV1327	deletion	300,420	Chr2	93,977,372	94,277,793	1	1	1	0	0
1328	INRA_BovSV1328	inversion	50,707	Chr27	39,420,442	39,471,134	2	3	2	0	1
1329	INRA_BovSV1329	deletion	2,743	Chr2	93,099,026	93,101,770	1	1	0	1	0
1330	INRA_BovSV1330	inversion	4,963	Chr27	36,512,809	36,517,773	1	1	1	0	0
1331	INRA_BovSV1331	inversion	4,998	Chr11	42,075,300	42,080,299	1	1	1	0	0
1332	INRA_BovSV1332	Tandem duplication	61,637	Chr18	61,335,100	61,396,738	1	1	0	0	1
1333	INRA_BovSV1333	inversion	6,881	Chr27	39,583,618	39,590,500	1	1	1	0	0
1334	INRA_BovSV1334	inversion	12,885	Chr27	40,879,801	40,892,659	2	3	0	2	1
1335	INRA_BovSV1335	inversion	2,201	Chr11	42,635,859	42,638,061	1	1	1	0	0
1336	INRA_BovSV1336	Tandem duplication	60,369	Chr18	61,343,027	61,403,397	1	1	0	0	1
1337	INRA_BovSV1337	deletion	67	Chr2	99,935,066	99,935,134	1	1	0	0	1
1338	INRA_BovSV1338	inversion	2,496,070	Chr27	40,468,253	42,964,324	2	2	1	0	1
1339	INRA_BovSV1339	inversion	29,686	Chr11	43,219,872	43,249,559	1	1	1	0	0
1340	INRA_BovSV1340	deletion	159	Chr2	100,832,556	100,832,716	1	1	0	1	0
1341	INRA_BovSV1341	deletion	2,785,413	Chr2	101,300,506	104,085,920	3	7	1	5	1
1342	INRA_BovSV1342	inversion	4,242	Chr28	64,442	68,685	1	1	0	0	1
1343	INRA_BovSV1343	deletion	1,036	Chr2	103,278,282	103,279,319	3	4	2	1	1
1344	INRA_BovSV1344	Tandem duplication	259,122	Chr18	61,407,562	61,666,685	1	1	1	0	0
1345	INRA_BovSV1345	deletion	16,904	Chr2	100,235,301	100,252,206	1	2	2	0	0
1346	INRA_BovSV1346	inversion	112,347	Chr28	2,610,375	2,722,723	1	1	1	0	0
1347	INRA_BovSV1347	Tandem duplication	143,722	Chr18	61,431,762	61,575,485	1	1	1	0	0
1348	INRA_BovSV1348	inversion	1,713	Chr28	3,123,571	3,125,275	1	1	1	0	0
1349	INRA_BovSV1349	deletion	55	Chr2	105,106,676	105,106,732	1	1	0	0	1
1350	INRA_BovSV1350	Tandem duplication	719,731	Chr10	22,300,321	23,020,053	1	1	1	0	0
1351	INRA_BovSV1351	deletion	65	Chr2	107,015,113	107,015,179	1	1	1	0	0
1352	INRA_BovSV1352	deletion	1,551	Chr2	108,489,163	108,490,715	2	2	0	1	1
1353	INRA_BovSV1353	Tandem duplication	261,621	Chr18	61,477,824	61,739,446	1	1	1	0	0
1354	INRA_BovSV1354	inversion	136,440	Chr28	2,379,666	2,516,107	2	3	1	2	0
1355	INRA_BovSV1355	inversion	17,229	Chr28	2,429,466	2,446,696	1	1	1	0	0
1356	INRA_BovSV1356	Tandem duplication	52,354	Chr18	61,484,757	61,537,112	2	2	1	0	1
1357	INRA_BovSV1357	inversion	3,319	Chr28	5,738,625	5,741,883	1	1	1	0	0
1358	INRA_BovSV1358	deletion	541	Chr2	112,302,121	112,302,663	3	11	5	3	3
1359	INRA_BovSV1359	inversion	2,493,691	Chr28	5,542,719	8,036,399	3	5	2	2	1
1360	INRA_BovSV1360	Tandem duplication	206,727	Chr18	61,530,955	61,737,683	1	1	1	0	0
1361	INRA_BovSV1361	deletion	1,813	Chr2	114,408,331	114,410,145	1	2	0	0	2
1362	INRA_BovSV1362	inversion	1,322	Chr28	8,116,519	8,117,838	1	1	0	1	0
1363	INRA_BovSV1363	Tandem duplication	69,873	Chr18	61,862,025	61,931,899	1	1	0	0	1
1364	INRA_BovSV1364	inversion	19,989	Chr28	5,185,163	5,205,153	1	1	0	0	1
1365	INRA_BovSV1365	inversion	3,100	Chr28	5,733,527	5,736,628	1	1	1	0	0
1366	INRA_BovSV1366	inversion	22,126	Chr28	6,122,827	6,144,954	1	1	1	0	0
1367	INRA_BovSV1367	Tandem duplication	70,989	Chr18	61,868,619	61,939,609	1	1	1	0	0
1368	INRA_BovSV1368	deletion	65	Chr2	119,416,746	119,416,812	1	1	0	1	0
1369	INRA_BovSV1369	inversion	8,495	Chr28	11,152,150	11,160,636	1	1	1	0	0
1370	INRA_BovSV1370	inversion	11,178	Chr28	11,150,806	11,161,985	2	3	2	1	0
1371	INRA_BovSV1371	inversion	1,709	Chr28	11,290,958	11,292,668	1	2	0	0	2
1372	INRA_BovSV1372	inversion	10,335	Chr28	11,353,798	11,364,050	1	1	1	0	0
1373	INRA_BovSV1373	inversion	4,366	Chr28	11,363,741	11,368,084	1	1	1	0	0
1374	INRA_BovSV1374	inversion	2,371	Chr28	12,047,426	12,049,778	1	1	0	0	1
1375	INRA_BovSV1375	deletion	3,309	Chr2	120,235,102	120,238,412	2	2	1	1	0
1376	INRA_BovSV1376	deletion	489	Chr2	120,502,714	120,503,204	2	2	1	0	1
1377	INRA_BovSV1377	deletion	69	Chr2	121,759,902	121,759,972	3	11	2	5	4
1378	INRA_BovSV1378	inversion	678	Chr28	13,062,485	13,063,164	1	1	1	0	0
1379	INRA_BovSV1379	Tandem duplication	45,487	Chr18	63,511,040	63,556,528	2	3	1	0	2
1380	INRA_BovSV1380	deletion	53	Chr2	123,776,676	123,776,730	1	1	0	1	0
1381	INRA_BovSV1381	inversion	4,430	Chr28	14,378,255	14,382,686	1	1	1	0	0
1382	INRA_BovSV1382	Tandem duplication	145,722	Chr18	63,633,825	63,779,548	1	1	1	0	0
1383	INRA_BovSV1383	inversion	16,039	Chr28	11,529,681	11,545,721	1	1	1	0	0
1384	INRA_BovSV1384	deletion	285	Chr2	125,652,325	125,652,611	1	1	0	0	1
1385	INRA_BovSV1385	inversion	672	Chr28	13,423,928	13,424,601	1	1	1	0	0
1386	INRA_BovSV1386	inversion	19,454	Chr28	14,064,462	14,083,917	1	1	1	0	0
1387	INRA_BovSV1387	deletion	58	Chr2	127,131,425	127,131,484	1	1	0	1	0
1388	INRA_BovSV1388	deletion	63	Chr2	127,716,677	127,716,741	1	2	2	0	0
1389	INRA_BovSV1389	deletion	71	Chr2	128,349,506	128,349,578	3	5	1	1	3
1390	INRA_BovSV1390	inversion	3,780,466	Chr28	11,950,079	15,730,504	1	1	1	0	0
1391	INRA_BovSV1391	deletion	52	Chr2	129,144,243	129,144,296	1	1	0	1	0
1392	INRA_BovSV1392	inversion	13,314	Chr28	15,383,292	15,396,607	1	1	1	0	0
1393	INRA_BovSV1393	deletion	163,605	Chr2	129,742,163	129,905,769	1	3	0	3	0
1394	INRA_BovSV1394	inversion	755	Chr11	46,978,390	46,979,146	1	1	1	0	0
1395	INRA_BovSV1395	deletion	69	Chr2	127,716,718	127,716,788	2	2	1	0	1
1396	INRA_BovSV1396	deletion	20,775	Chr2	127,988,447	128,009,223	2	3	2	1	0
1397	INRA_BovSV1397	inversion	1,252	Chr10	12,025,798	12,027,033	1	1	0	0	1
1398	INRA_BovSV1398	Tandem duplication	114,739	Chr10	25,410,296	25,525,036	1	1	0	0	1
1399	INRA_BovSV1399	deletion	27,097	Chr2	133,139,179	133,166,277	1	1	0	0	1
1400	INRA_BovSV1400	deletion	26,905	Chr2	133,140,921	133,167,827	2	3	2	1	0
1401	INRA_BovSV1401	deletion	27,291	Chr2	133,149,823	133,177,115	1	1	0	1	0
1402	INRA_BovSV1402	deletion	27,288	Chr2	133,151,157	133,178,446	1	1	1	0	0
1403	INRA_BovSV1403	deletion	28,383	Chr2	133,293,611	133,321,995	3	6	4	1	1
1404	INRA_BovSV1404	deletion	28,383	Chr2	133,293,626	133,322,010	3	7	4	1	2
1405	INRA_BovSV1405	deletion	91	Chr2	133,520,620	133,520,712	2	3	0	1	2
1406	INRA_BovSV1406	deletion	69	Chr2	134,010,231	134,010,301	1	2	2	0	0
1407	INRA_BovSV1407	deletion	88	Chr2	134,448,466	134,448,555	1	1	0	0	1
1408	INRA_BovSV1408	deletion	58	Chr2	134,982,844	134,982,903	1	2	0	2	0
1409	INRA_BovSV1409	deletion	27,098	Chr2	133,139,178	133,166,277	2	2	1	0	1
1410	INRA_BovSV1410	deletion	119	Chr2	133,166,944	133,167,064	1	1	0	1	0
1411	INRA_BovSV1411	deletion	58	Chr2	135,590,007	135,590,066	1	1	0	0	1
1412	INRA_BovSV1412	deletion	84	Chr2	135,823,096	135,823,181	2	4	3	1	0
1413	INRA_BovSV1413	deletion	54	Chr2	135,837,104	135,837,159	3	3	1	1	1
1414	INRA_BovSV1414	inversion	4,088	Chr28	21,010,007	21,014,096	1	1	0	0	1
1415	INRA_BovSV1415	deletion	76	Chr2	136,309,778	136,309,855	1	1	0	1	0
1416	INRA_BovSV1416	deletion	139,784	Chr2	136,787,213	136,926,998	2	2	1	0	1
1417	INRA_BovSV1417	deletion	81,179	Chr2	136,940,626	137,021,806	1	1	1	0	0
1418	INRA_BovSV1418	deletion	21,885	Chr3	1,026,995	1,048,881	3	13	5	7	1
1419	INRA_BovSV1419	deletion	214	Chr3	1,492,103	1,492,318	1	1	0	0	1
1420	INRA_BovSV1420	deletion	1,662,552	Chr3	2,180,282	3,842,835	1	2	2	0	0
1421	INRA_BovSV1421	deletion	2,025	Chr3	2,344,297	2,346,323	1	1	0	0	1
1422	INRA_BovSV1422	deletion	55	Chr3	2,860,423	2,860,479	2	3	2	0	1
1423	INRA_BovSV1423	deletion	55	Chr3	2,860,454	2,860,510	1	2	0	0	2
1424	INRA_BovSV1424	deletion	55	Chr3	2,860,579	2,860,635	1	2	0	0	2
1425	INRA_BovSV1425	deletion	374	Chr3	3,054,821	3,055,196	1	2	2	0	0
1426	INRA_BovSV1426	inversion	774	Chr28	23,996,323	23,997,064	1	1	0	1	0
1427	INRA_BovSV1427	inversion	2,117	Chr28	24,046,949	24,049,045	1	1	1	0	0
1428	INRA_BovSV1428	deletion	151	Chr3	4,155,373	4,155,525	2	2	1	0	1
1429	INRA_BovSV1429	inversion	1,425,468	Chr28	18,813,792	20,239,261	1	1	1	0	0
1430	INRA_BovSV1430	inversion	8,709	Chr28	21,972,916	21,981,626	1	1	1	0	0
1431	INRA_BovSV1431	inversion	2,182	Chr28	25,419,169	25,421,352	1	1	0	0	1
1432	INRA_BovSV1432	inversion	2,592	Chr28	26,440,145	26,442,722	1	1	1	0	0
1433	INRA_BovSV1433	inversion	1,234	Chr28	27,381,368	27,382,603	1	1	1	0	0
1434	INRA_BovSV1434	deletion	608	Chr3	6,177,777	6,178,386	3	6	3	1	2
1435	INRA_BovSV1435	inversion	3,985	Chr28	26,565,287	26,569,273	1	1	0	0	1
1436	INRA_BovSV1436	inversion	2,919	Chr28	28,151,548	28,154,468	1	1	0	1	0
1437	INRA_BovSV1437	deletion	1,253	Chr3	6,953,672	6,954,926	3	9	6	1	2
1438	INRA_BovSV1438	deletion	7,771	Chr3	8,098,854	8,106,626	2	3	0	1	2
1439	INRA_BovSV1439	deletion	16,360	Chr3	8,636,294	8,652,655	2	4	1	0	3
1440	INRA_BovSV1440	deletion	3,358,984	Chr3	1,758,257	5,117,242	1	1	1	0	0
1441	INRA_BovSV1441	deletion	7,077	Chr3	5,365,015	5,372,093	2	3	2	0	1
1442	INRA_BovSV1442	inversion	6,314	Chr28	32,702,869	32,709,166	1	1	1	0	0
1443	INRA_BovSV1443	inversion	7,637	Chr28	32,702,228	32,709,840	1	1	1	0	0
1444	INRA_BovSV1444	deletion	59,085	Chr3	8,621,550	8,680,636	1	1	0	0	1
1445	INRA_BovSV1445	deletion	165	Chr3	10,007,073	10,007,239	3	11	5	2	4
1446	INRA_BovSV1446	Tandem duplication	15,071	Chr18	64,243,684	64,258,756	1	1	0	1	0
1447	INRA_BovSV1447	deletion	22,494	Chr3	11,274,488	11,296,983	3	12	8	1	3
1448	INRA_BovSV1448	deletion	54,403	Chr3	11,840,380	11,894,784	3	12	5	3	4
1449	INRA_BovSV1449	deletion	53,706	Chr3	11,844,572	11,898,279	1	2	0	2	0
1450	INRA_BovSV1450	deletion	32,066	Chr3	11,854,376	11,886,443	2	2	1	1	0
1451	INRA_BovSV1451	deletion	24,220	Chr3	11,868,909	11,893,130	1	1	0	0	1
1452	INRA_BovSV1452	deletion	42,093	Chr3	11,995,029	12,037,123	1	1	0	0	1
1453	INRA_BovSV1453	deletion	42,145	Chr3	11,997,277	12,039,423	3	11	5	3	3
1454	INRA_BovSV1454	deletion	5,286	Chr3	12,078,267	12,083,554	3	4	2	1	1
1455	INRA_BovSV1455	deletion	47,308	Chr3	12,148,948	12,196,257	1	1	0	0	1
1456	INRA_BovSV1456	inversion	12,944	Chr28	37,876,590	37,889,519	1	1	0	0	1
1457	INRA_BovSV1457	inversion	6,722	Chr28	38,572,238	38,578,961	1	1	0	1	0
1458	INRA_BovSV1458	inversion	1,991,884	Chr28	37,838,109	39,829,994	1	1	0	1	0
1459	INRA_BovSV1459	inversion	3,117	Chr28	38,235,451	38,238,569	1	1	0	0	1
1460	INRA_BovSV1460	deletion	22,500	Chr3	11,274,553	11,297,054	1	3	3	0	0
1461	INRA_BovSV1461	deletion	21,139	Chr3	11,782,956	11,804,096	1	1	0	0	1
1462	INRA_BovSV1462	deletion	53,706	Chr3	11,844,572	11,898,279	2	3	2	0	1
1463	INRA_BovSV1463	deletion	49,431	Chr3	12,009,046	12,058,478	1	1	0	1	0
1464	INRA_BovSV1464	inversion	1,938	Chr28	40,282,029	40,283,964	1	1	1	0	0
1465	INRA_BovSV1465	Tandem duplication	911,288	Chr19	2,982,199	3,893,488	3	15	10	2	3
1466	INRA_BovSV1466	deletion	51	Chr3	15,385,934	15,385,986	1	1	1	0	0
1467	INRA_BovSV1467	deletion	13,002	Chr3	17,091,708	17,104,711	1	2	0	2	0
1468	INRA_BovSV1468	deletion	11,706	Chr3	17,095,686	17,107,393	1	1	1	0	0
1469	INRA_BovSV1469	deletion	12,663	Chr3	17,097,979	17,110,643	1	1	0	0	1
1470	INRA_BovSV1470	deletion	265,839	Chr3	17,419,358	17,685,198	3	21	9	7	5
1471	INRA_BovSV1471	deletion	9,497	Chr3	17,434,654	17,444,152	3	20	7	8	5
1472	INRA_BovSV1472	deletion	97,409	Chr3	17,457,409	17,554,819	1	1	1	0	0
1473	INRA_BovSV1473	deletion	219,074	Chr3	17,463,181	17,682,256	2	4	2	0	2
1474	INRA_BovSV1474	deletion	97,195	Chr3	17,466,993	17,564,189	1	1	0	1	0
1475	INRA_BovSV1475	deletion	18,997	Chr3	17,709,775	17,728,773	1	1	1	0	0
1476	INRA_BovSV1476	deletion	21,299	Chr3	17,960,529	17,981,829	1	1	1	0	0
1477	INRA_BovSV1477	deletion	862	Chr3	18,020,250	18,021,113	2	3	2	1	0
1478	INRA_BovSV1478	deletion	315	Chr3	18,719,924	18,720,240	2	10	7	0	3
1479	INRA_BovSV1479	inversion	34,384	Chr28	42,475,370	42,509,755	1	1	0	0	1
1480	INRA_BovSV1480	inversion	605	Chr28	43,345,773	43,346,379	1	1	1	0	0
1481	INRA_BovSV1481	deletion	66	Chr3	19,375,925	19,375,992	1	1	0	1	0
1482	INRA_BovSV1482	deletion	13,013	Chr3	17,089,975	17,102,989	1	1	0	1	0
1483	INRA_BovSV1483	deletion	38,061	Chr3	17,707,500	17,745,562	1	1	0	1	0
1484	INRA_BovSV1484	deletion	99	Chr3	20,059,785	20,059,885	1	1	0	0	1
1485	INRA_BovSV1485	deletion	158,872	Chr3	21,076,312	21,235,185	2	4	2	2	0
1486	INRA_BovSV1486	deletion	18,130	Chr3	21,246,739	21,264,870	1	1	0	0	1
1487	INRA_BovSV1487	deletion	20,565	Chr3	22,808,259	22,828,825	1	1	0	1	0
1488	INRA_BovSV1488	Tandem duplication	148,250	Chr19	6,267,001	6,415,252	3	9	2	1	6
1489	INRA_BovSV1489	deletion	17,709	Chr3	22,798,056	22,815,766	2	2	1	0	1
1490	INRA_BovSV1490	deletion	287	Chr3	26,039,828	26,040,116	1	1	0	1	0
1491	INRA_BovSV1491	Tandem duplication	84,374	Chr19	6,367,032	6,451,407	1	1	1	0	0
1492	INRA_BovSV1492	Tandem duplication	77,778	Chr19	19,830,672	19,908,451	1	1	1	0	0
1493	INRA_BovSV1493	inversion	383,214	Chr29	5,296,373	5,679,588	3	7	2	2	3
1494	INRA_BovSV1494	inversion	116,203	Chr29	5,526,109	5,642,313	1	1	0	1	0
1495	INRA_BovSV1495	inversion	461,123	Chr29	5,619,985	6,081,107	1	1	1	0	0
1496	INRA_BovSV1496	deletion	1,234,314	Chr3	27,649,162	28,883,477	1	1	0	1	0
1497	INRA_BovSV1497	inversion	6,606	Chr29	7,871,680	7,878,285	1	3	3	0	0
1498	INRA_BovSV1498	inversion	3,587	Chr29	9,093,026	9,096,578	1	1	0	1	0
1499	INRA_BovSV1499	inversion	612	Chr29	9,373,958	9,374,571	1	1	1	0	0
1500	INRA_BovSV1500	inversion	407,302	Chr29	5,294,660	5,701,963	1	1	1	0	0
1501	INRA_BovSV1501	inversion	195,669	Chr29	5,310,575	5,506,245	1	1	0	0	1
1502	INRA_BovSV1502	deletion	80	Chr3	36,406,939	36,407,020	1	1	0	1	0
1503	INRA_BovSV1503	deletion	2,431,152	Chr3	36,722,888	39,154,041	1	1	1	0	0
1504	INRA_BovSV1504	inversion	192,640	Chr29	5,312,083	5,504,724	1	1	1	0	0
1505	INRA_BovSV1505	inversion	314,263	Chr29	5,454,479	5,768,743	1	1	0	0	1
1506	INRA_BovSV1506	deletion	56	Chr11	76,296,053	76,296,110	1	1	0	1	0
1507	INRA_BovSV1507	deletion	4,330	Chr3	37,806,269	37,810,600	3	12	8	2	2
1508	INRA_BovSV1508	Tandem duplication	34,376	Chr19	24,596,980	24,631,357	1	1	1	0	0
1509	INRA_BovSV1509	inversion	126,985	Chr29	5,522,032	5,649,018	1	1	0	1	0
1510	INRA_BovSV1510	deletion	45,079	Chr3	39,177,853	39,222,933	2	3	1	2	0
1511	INRA_BovSV1511	inversion	234,337	Chr29	5,526,099	5,760,437	1	1	1	0	0
1512	INRA_BovSV1512	inversion	1,892	Chr11	50,865,370	50,867,253	1	1	0	0	1
1513	INRA_BovSV1513	Tandem duplication	9,143	Chr19	24,730,704	24,739,848	1	1	1	0	0
1514	INRA_BovSV1514	inversion	653	Chr11	51,432,937	51,433,591	1	1	0	1	0
1515	INRA_BovSV1515	inversion	3,356	Chr29	12,022,234	12,025,591	1	1	1	0	0
1516	INRA_BovSV1516	deletion	143	Chr3	43,375,849	43,375,993	3	14	5	4	5
1517	INRA_BovSV1517	inversion	178	Chr29	13,576,138	13,576,313	1	1	1	0	0
1518	INRA_BovSV1518	inversion	7,136	Chr29	13,795,293	13,802,400	1	1	1	0	0
1519	INRA_BovSV1519	Tandem duplication	30,955	Chr19	30,089,411	30,120,367	3	9	3	4	2
1520	INRA_BovSV1520	inversion	3,615	Chr29	14,766,407	14,770,023	1	1	1	0	0
1521	INRA_BovSV1521	inversion	8,341	Chr29	14,907,537	14,915,879	1	1	1	0	0
1522	INRA_BovSV1522	Tandem duplication	30,922	Chr19	30,089,543	30,120,466	2	2	0	1	1
1523	INRA_BovSV1523	inversion	833	Chr29	16,022,677	16,023,511	1	1	1	0	0
1524	INRA_BovSV1524	deletion	371	Chr3	48,260,757	48,261,129	3	5	3	1	1
1525	INRA_BovSV1525	inversion	8,777	Chr11	51,978,996	51,987,772	1	1	1	0	0
1526	INRA_BovSV1526	Tandem duplication	31,283	Chr19	43,894,453	43,925,737	1	1	0	0	1
1527	INRA_BovSV1527	inversion	143,113	Chr29	19,430,342	19,573,442	1	2	0	2	0
1528	INRA_BovSV1528	inversion	1,895	Chr29	19,842,017	19,843,913	1	1	0	0	1
1529	INRA_BovSV1529	Tandem duplication	71	Chr19	44,359,014	44,359,086	2	2	1	1	0
1530	INRA_BovSV1530	deletion	68	Chr3	51,177,747	51,177,816	1	1	1	0	0
1531	INRA_BovSV1531	inversion	6,690	Chr29	19,155,185	19,161,876	1	1	1	0	0
1532	INRA_BovSV1532	inversion	1,997	Chr29	19,832,668	19,834,666	1	2	2	0	0
1533	INRA_BovSV1533	inversion	1,762	Chr11	52,352,167	52,353,930	1	2	0	0	2
1534	INRA_BovSV1534	deletion	57	Chr3	54,080,705	54,080,763	1	1	1	0	0
1535	INRA_BovSV1535	deletion	554,152	Chr3	54,329,166	54,883,319	1	3	0	0	3
1536	INRA_BovSV1536	deletion	238,862	Chr3	54,338,812	54,577,675	2	6	5	0	1
1537	INRA_BovSV1537	deletion	241,380	Chr3	54,357,110	54,598,491	1	1	0	0	1
1538	INRA_BovSV1538	deletion	240,524	Chr3	54,371,205	54,611,730	3	9	7	1	1
1539	INRA_BovSV1539	deletion	234,901	Chr3	54,393,238	54,628,140	2	2	0	1	1
1540	INRA_BovSV1540	deletion	234,936	Chr3	54,394,840	54,629,777	3	7	2	4	1
1541	INRA_BovSV1541	deletion	530,206	Chr3	54,434,822	54,965,029	2	6	5	0	1
1542	INRA_BovSV1542	deletion	32,329	Chr3	54,772,572	54,804,902	1	1	1	0	0
1543	INRA_BovSV1543	deletion	37,291	Chr3	54,790,524	54,827,816	2	7	5	0	2
1544	INRA_BovSV1544	inversion	1,226,922	Chr29	20,606,778	21,833,663	1	2	2	0	0
1545	INRA_BovSV1545	deletion	241,318	Chr3	54,340,640	54,581,959	1	2	0	0	2
1546	INRA_BovSV1546	deletion	234,892	Chr3	54,383,747	54,618,640	1	1	0	0	1
1547	INRA_BovSV1547	deletion	530,002	Chr3	54,460,326	54,990,329	3	3	1	1	1
1548	INRA_BovSV1548	deletion	322,345	Chr3	54,537,863	54,860,209	2	2	0	1	1
1549	INRA_BovSV1549	deletion	84	Chr3	55,758,670	55,758,755	3	15	9	2	4
1550	INRA_BovSV1550	deletion	794	Chr3	56,984,140	56,984,935	2	3	2	1	0
1551	INRA_BovSV1551	Tandem duplication	15,831	Chr19	48,876,979	48,892,811	1	2	0	0	2
1552	INRA_BovSV1552	inversion	2,889	Chr29	22,944,434	22,947,324	1	1	1	0	0
1553	INRA_BovSV1553	inversion	9,476	Chr29	23,737,768	23,747,245	1	1	0	1	0
1554	INRA_BovSV1554	Tandem duplication	15,912	Chr19	48,881,044	48,896,957	2	4	2	0	2
1555	INRA_BovSV1555	deletion	67	Chr11	79,900,533	79,900,601	1	1	1	0	0
1556	INRA_BovSV1556	Tandem duplication	15,856	Chr19	48,883,332	48,899,189	1	1	1	0	0
1557	INRA_BovSV1557	deletion	748	Chr3	57,376,736	57,377,485	1	1	0	1	0
1558	INRA_BovSV1558	inversion	2,825	Chr29	26,658,865	26,661,691	1	1	0	0	1
1559	INRA_BovSV1559	inversion	74,320	Chr29	26,881,909	26,956,204	2	2	1	0	1
1560	INRA_BovSV1560	deletion	542	Chr3	59,837,301	59,837,844	1	1	0	0	1
1561	INRA_BovSV1561	inversion	356,236	Chr29	27,411,196	27,767,431	1	1	1	0	0
1562	INRA_BovSV1562	inversion	6,613	Chr11	53,018,681	53,025,289	1	1	1	0	0
1563	INRA_BovSV1563	inversion	4,522	Chr29	29,142,708	29,147,231	1	1	0	1	0
1564	INRA_BovSV1564	inversion	61,727	Chr29	26,680,377	26,742,105	1	1	0	0	1
1565	INRA_BovSV1565	inversion	17,314	Chr29	26,695,458	26,712,773	1	1	1	0	0
1566	INRA_BovSV1566	inversion	74,334	Chr29	26,881,883	26,956,218	1	1	1	0	0
1567	INRA_BovSV1567	inversion	74,317	Chr29	26,881,898	26,956,216	2	2	0	1	1
1568	INRA_BovSV1568	inversion	359,788	Chr29	27,377,747	27,737,536	2	2	1	1	0
1569	INRA_BovSV1569	inversion	6,679	Chr29	28,267,660	28,274,340	1	1	1	0	0
1570	INRA_BovSV1570	Tandem duplication	41,255	Chr19	50,897,715	50,938,971	2	5	2	0	3
1571	INRA_BovSV1571	deletion	72	Chr3	66,990,423	66,990,496	2	2	1	0	1
1572	INRA_BovSV1572	inversion	91,429	Chr29	30,255,064	30,346,494	1	2	0	2	0
1573	INRA_BovSV1573	Tandem duplication	139,905	Chr19	52,739,883	52,879,789	3	6	3	1	2
1574	INRA_BovSV1574	inversion	116,874	Chr29	30,251,820	30,368,695	1	2	2	0	0
1575	INRA_BovSV1575	deletion	4,420	Chr3	65,338,614	65,343,035	1	1	0	0	1
1576	INRA_BovSV1576	inversion	31,880	Chr29	31,331,693	31,363,568	1	1	1	0	0
1577	INRA_BovSV1577	inversion	2,700	Chr29	33,363,836	33,366,503	1	2	0	2	0
1578	INRA_BovSV1578	deletion	141	Chr3	71,600,966	71,601,108	1	2	2	0	0
1579	INRA_BovSV1579	Tandem duplication	147,668	Chr19	52,870,982	53,018,651	2	2	0	1	1
1580	INRA_BovSV1580	deletion	3,531	Chr3	71,820,146	71,823,678	3	26	10	7	9
1581	INRA_BovSV1581	deletion	3,112	Chr3	74,626,706	74,629,819	1	2	2	0	0
1582	INRA_BovSV1582	inversion	79,789	Chr29	30,260,521	30,340,311	1	1	1	0	0
1583	INRA_BovSV1583	inversion	58,951	Chr29	30,265,830	30,324,782	1	1	1	0	0
1584	INRA_BovSV1584	inversion	88,322	Chr29	30,278,920	30,367,243	1	1	1	0	0
1585	INRA_BovSV1585	Tandem duplication	268,104	Chr19	54,571,192	54,839,297	2	2	0	1	1
1586	INRA_BovSV1586	inversion	1,039	Chr29	30,315,643	30,316,683	1	1	0	1	0
1587	INRA_BovSV1587	inversion	703,280	Chr11	50,098,310	50,801,591	1	1	1	0	0
1588	INRA_BovSV1588	Tandem duplication	16,853	Chr19	57,488,263	57,505,117	1	1	0	0	1
1589	INRA_BovSV1589	deletion	2,471	Chr3	78,568,563	78,571,035	2	2	1	1	0
1590	INRA_BovSV1590	deletion	2,473	Chr3	78,568,850	78,571,324	1	1	1	0	0
1591	INRA_BovSV1591	inversion	3,984	Chr29	36,205,707	36,209,650	1	1	0	0	1
1592	INRA_BovSV1592	Tandem duplication	1,811,777	Chr19	60,963,438	62,775,216	2	2	0	1	1
1593	INRA_BovSV1593	inversion	1,036,147	Chr29	36,558,192	37,594,340	1	2	0	0	2
1594	INRA_BovSV1594	inversion	1,032,091	Chr29	36,560,348	37,592,440	1	1	0	1	0
1595	INRA_BovSV1595	inversion	1,002,146	Chr29	36,577,573	37,579,702	1	1	1	0	0
1596	INRA_BovSV1596	inversion	999,814	Chr29	36,578,763	37,578,540	2	3	1	2	0
1597	INRA_BovSV1597	inversion	2,585	Chr29	37,608,192	37,610,778	2	2	0	1	1
1598	INRA_BovSV1598	Tandem duplication	86	Chr19	62,689,203	62,689,290	2	3	0	1	2
1599	INRA_BovSV1599	deletion	528	Chr3	78,581,967	78,582,496	1	1	1	0	0
1600	INRA_BovSV1600	inversion	4,353	Chr29	37,611,915	37,616,269	1	1	0	0	1
1601	INRA_BovSV1601	deletion	8,213	Chr3	80,294,529	80,302,743	1	1	1	0	0
1602	INRA_BovSV1602	deletion	8,213	Chr3	80,294,571	80,302,785	1	1	1	0	0
1603	INRA_BovSV1603	inversion	49,398	Chr29	38,173,596	38,222,995	2	3	2	0	1
1604	INRA_BovSV1604	inversion	91,791	Chr29	38,156,482	38,248,246	2	2	0	1	1
1605	INRA_BovSV1605	inversion	10,644	Chr29	38,467,215	38,477,824	1	1	0	1	0
1606	INRA_BovSV1606	inversion	10,483	Chr29	38,467,294	38,477,778	1	1	0	0	1
1607	INRA_BovSV1607	inversion	857,412	Chr29	38,493,219	39,350,616	1	1	0	0	1
1608	INRA_BovSV1608	inversion	455,856	Chr29	38,891,086	39,346,943	1	1	0	0	1
1609	INRA_BovSV1609	deletion	70,052	Chr3	82,732,661	82,802,714	1	1	0	1	0
1610	INRA_BovSV1610	deletion	90	Chr3	83,519,109	83,519,200	1	1	0	0	1
1611	INRA_BovSV1611	inversion	43,265	Chr29	38,240,943	38,284,209	1	2	0	2	0
1612	INRA_BovSV1612	inversion	10,508	Chr29	38,467,281	38,477,790	1	1	0	1	0
1613	INRA_BovSV1613	inversion	10,058	Chr29	38,530,870	38,540,929	1	1	1	0	0
1614	INRA_BovSV1614	Tandem duplication	32,897	Chr1	4,204,409	4,237,307	1	1	1	0	0
1615	INRA_BovSV1615	inversion	46,908	Chr29	39,250,718	39,297,627	1	2	0	0	2
1616	INRA_BovSV1616	deletion	57	Chr11	81,831,050	81,831,108	1	1	0	0	1
1617	INRA_BovSV1617	deletion	64	Chr3	89,040,617	89,040,682	3	24	11	7	6
1618	INRA_BovSV1618	deletion	188	Chr10	19,725,989	19,726,178	1	2	0	0	2
1619	INRA_BovSV1619	inversion	1,909	Chr11	52,000,810	52,002,720	1	2	2	0	0
1620	INRA_BovSV1620	Tandem duplication	8,185	Chr1	4,543,154	4,551,340	1	4	4	0	0
1621	INRA_BovSV1621	inversion	2,436,734	Chr10	333,310	2,770,033	1	1	0	1	0
1622	INRA_BovSV1622	inversion	1,160	Chr29	41,395,236	41,396,397	1	1	1	0	0
1623	INRA_BovSV1623	deletion	193,252	Chr3	86,834,838	87,028,091	1	1	1	0	0
1624	INRA_BovSV1624	deletion	2,116,774	Chr3	90,204,572	92,321,347	1	1	1	0	0
1625	INRA_BovSV1625	Tandem duplication	8,157	Chr1	4,546,347	4,554,505	1	1	1	0	0
1626	INRA_BovSV1626	inversion	1,149	Chr29	42,242,187	42,243,337	1	1	1	0	0
1627	INRA_BovSV1627	Tandem duplication	8,210	Chr1	4,546,738	4,554,949	3	4	2	1	1
1628	INRA_BovSV1628	inversion	54,084	Chr29	42,535,163	42,589,248	1	1	1	0	0
1629	INRA_BovSV1629	deletion	57,557	Chr3	93,940,639	93,998,197	2	6	4	0	2
1630	INRA_BovSV1630	inversion	3,521	Chr29	48,993,369	48,996,879	1	2	2	0	0
1631	INRA_BovSV1631	inversion	4,748	Chr29	45,406,195	45,410,944	1	2	2	0	0
1632	INRA_BovSV1632	Tandem duplication	15,827	Chr1	4,548,879	4,564,707	2	2	1	1	0
1633	INRA_BovSV1633	deletion	82,900	Chr3	93,765,121	93,848,022	1	1	1	0	0
1634	INRA_BovSV1634	inversion	975,382	Chr29	50,512,184	51,487,567	1	1	0	0	1
1635	INRA_BovSV1635	deletion	1,714	Chr3	95,809,289	95,811,004	1	1	0	1	0
1636	INRA_BovSV1636	Tandem duplication	15,831	Chr1	4,549,004	4,564,836	2	2	1	0	1
1637	INRA_BovSV1637	Tandem duplication	16,791	Chr1	4,550,761	4,567,553	3	5	1	2	2
1638	INRA_BovSV1638	inversion	7,285	Chr2	1,919,531	1,926,807	1	1	1	0	0
1639	INRA_BovSV1639	deletion	2,990	Chr11	83,414,337	83,417,328	2	3	2	1	0
1640	INRA_BovSV1640	inversion	37,967	Chr2	2,981,918	3,019,886	2	4	2	0	2
1641	INRA_BovSV1641	inversion	3,080	Chr2	3,283,812	3,286,893	1	1	0	0	1
1642	INRA_BovSV1642	deletion	88	Chr3	100,396,521	100,396,610	1	2	2	0	0
1643	INRA_BovSV1643	deletion	70	Chr3	101,763,033	101,763,104	1	1	0	1	0
1644	INRA_BovSV1644	inversion	25,754	Chr2	1,520,090	1,545,845	1	1	1	0	0
1645	INRA_BovSV1645	inversion	7,984	Chr2	3,521,247	3,529,232	1	1	0	0	1
1646	INRA_BovSV1646	inversion	74,356	Chr2	5,874,854	5,949,211	1	2	2	0	0
1647	INRA_BovSV1647	deletion	81	Chr3	106,573,892	106,573,974	1	1	0	0	1
1648	INRA_BovSV1648	inversion	1,595	Chr2	7,850,918	7,852,514	1	2	2	0	0
1649	INRA_BovSV1649	inversion	2,058	Chr2	8,112,902	8,114,935	1	1	1	0	0
1650	INRA_BovSV1650	deletion	136	Chr3	109,869,703	109,869,840	1	1	1	0	0
1651	INRA_BovSV1651	deletion	159	Chr3	109,908,280	109,908,440	2	3	0	2	1
1652	INRA_BovSV1652	deletion	78	Chr3	109,966,789	109,966,868	2	3	2	0	1
1653	INRA_BovSV1653	inversion	4,910	Chr2	8,354,234	8,359,145	1	1	1	0	0
1654	INRA_BovSV1654	inversion	737	Chr2	8,892,037	8,892,771	1	1	0	1	0
1655	INRA_BovSV1655	Tandem duplication	21,772	Chr1	14,938,106	14,959,879	1	1	0	1	0
1656	INRA_BovSV1656	inversion	17,133	Chr2	9,981,984	9,999,118	1	2	0	2	0
1657	INRA_BovSV1657	deletion	78	Chr3	112,552,482	112,552,561	1	1	1	0	0
1658	INRA_BovSV1658	deletion	607,336	Chr3	113,610,758	114,218,095	2	4	0	2	2
1659	INRA_BovSV1659	deletion	4,500	Chr3	113,940,012	113,944,513	1	1	1	0	0
1660	INRA_BovSV1660	deletion	4,502	Chr3	113,942,710	113,947,213	3	10	3	5	2
1661	INRA_BovSV1661	inversion	6,801	Chr2	6,858,395	6,865,197	1	1	0	1	0
1662	INRA_BovSV1662	inversion	9,046	Chr2	7,670,309	7,679,356	1	1	0	1	0
1663	INRA_BovSV1663	deletion	5,234	Chr3	115,326,704	115,331,939	3	7	3	1	3
1664	INRA_BovSV1664	deletion	229	Chr3	115,874,065	115,874,295	2	5	2	0	3
1665	INRA_BovSV1665	Tandem duplication	4,215	Chr1	17,771,675	17,775,891	1	1	0	0	1
1666	INRA_BovSV1666	deletion	210	Chr3	119,227,064	119,227,275	1	1	1	0	0
1667	INRA_BovSV1667	inversion	2,778	Chr2	11,275,482	11,278,261	2	2	1	1	0
1668	INRA_BovSV1668	Tandem duplication	45,132	Chr1	20,148,115	20,193,248	2	4	3	0	1
1669	INRA_BovSV1669	inversion	6,091	Chr2	13,106,433	13,112,525	1	1	0	1	0
1670	INRA_BovSV1670	inversion	1,329	Chr2	13,409,407	13,410,729	1	1	0	1	0
1671	INRA_BovSV1671	deletion	7,511	Chr3	120,032,925	120,040,437	1	1	0	0	1
1672	INRA_BovSV1672	deletion	11,545	Chr3	120,059,258	120,070,804	3	30	16	4	10
1673	INRA_BovSV1673	deletion	5,095	Chr3	120,081,910	120,087,006	3	13	3	5	5
1674	INRA_BovSV1674	deletion	65	Chr3	120,215,845	120,215,911	1	3	3	0	0
1675	INRA_BovSV1675	deletion	218	Chr3	120,562,687	120,562,906	3	6	2	2	2
1676	INRA_BovSV1676	deletion	56	Chr3	120,587,481	120,587,538	1	1	0	0	1
1677	INRA_BovSV1677	deletion	86	Chr3	120,632,783	120,632,870	1	1	0	0	1
1678	INRA_BovSV1678	deletion	84	Chr3	121,290,718	121,290,803	1	1	1	0	0
1679	INRA_BovSV1679	deletion	145	Chr3	121,353,070	121,353,216	1	1	0	1	0
1680	INRA_BovSV1680	deletion	96,775	Chr3	119,918,415	120,015,191	1	2	2	0	0
1681	INRA_BovSV1681	inversion	1,659	Chr2	14,359,935	14,361,589	1	1	1	0	0
1682	INRA_BovSV1682	deletion	161	Chr3	121,353,054	121,353,216	2	2	1	1	0
1683	INRA_BovSV1683	inversion	3,954	Chr2	12,768,166	12,772,121	1	1	1	0	0
1684	INRA_BovSV1684	Tandem duplication	191,026	Chr1	30,090,285	30,281,312	2	3	2	0	1
1685	INRA_BovSV1685	inversion	692	Chr2	13,471,883	13,472,576	2	3	2	1	0
1686	INRA_BovSV1686	inversion	747	Chr2	13,471,858	13,472,606	2	2	1	0	1
1687	INRA_BovSV1687	Tandem duplication	2,235	Chr1	31,352,021	31,354,257	3	4	2	1	1
1688	INRA_BovSV1688	inversion	52,106	Chr2	15,500,651	15,552,752	1	2	2	0	0
1689	INRA_BovSV1689	Tandem duplication	57,971	Chr10	25,486,005	25,543,977	3	3	1	1	1
1690	INRA_BovSV1690	Tandem duplication	16,270	Chr1	41,939,884	41,956,155	1	2	0	0	2
1691	INRA_BovSV1691	Tandem duplication	16,261	Chr1	41,940,004	41,956,266	1	1	1	0	0
1692	INRA_BovSV1692	inversion	1,813	Chr2	24,153,725	24,155,539	1	1	0	1	0
1693	INRA_BovSV1693	inversion	1,391	Chr2	27,795,609	27,797,001	1	1	1	0	0
1694	INRA_BovSV1694	inversion	1,982	Chr2	28,605,969	28,607,910	1	1	0	1	0
1695	INRA_BovSV1695	Tandem duplication	1,379	Chr1	55,956,383	55,957,763	1	1	0	0	1
1696	INRA_BovSV1696	inversion	904	Chr2	29,545,245	29,546,138	1	1	1	0	0
1697	INRA_BovSV1697	inversion	19,395	Chr2	25,284,952	25,304,348	1	1	1	0	0
1698	INRA_BovSV1698	deletion	154	Chr4	14,813,757	14,813,912	3	9	4	3	2
1699	INRA_BovSV1699	deletion	84	Chr11	85,425,629	85,425,714	1	1	0	1	0
1700	INRA_BovSV1700	deletion	63	Chr4	17,468,923	17,468,987	3	20	8	7	5
1701	INRA_BovSV1701	deletion	67	Chr4	18,676,222	18,676,290	1	1	0	1	0
1702	INRA_BovSV1702	inversion	8,281	Chr2	33,858,211	33,866,479	1	2	0	2	0
1703	INRA_BovSV1703	Tandem duplication	19,709	Chr1	100,082,189	100,101,899	1	1	0	1	0
1704	INRA_BovSV1704	inversion	8,280	Chr2	33,858,205	33,866,486	1	1	0	0	1
1705	INRA_BovSV1705	inversion	7,829	Chr2	36,708,159	36,715,989	2	3	2	0	1
1706	INRA_BovSV1706	inversion	1,241	Chr2	36,714,719	36,715,961	1	1	0	0	1
1707	INRA_BovSV1707	deletion	57	Chr4	21,318,170	21,318,228	1	1	0	0	1
1708	INRA_BovSV1708	deletion	133	Chr4	21,738,591	21,738,725	2	3	2	1	0
1709	INRA_BovSV1709	deletion	639	Chr4	22,870,541	22,871,181	3	4	2	1	1
1710	INRA_BovSV1710	deletion	369,752	Chr4	23,506,616	23,876,369	2	3	0	1	2
1711	INRA_BovSV1711	inversion	4,383	Chr11	58,545,692	58,550,048	1	1	1	0	0
1712	INRA_BovSV1712	inversion	1,540	Chr2	41,030,913	41,032,454	1	1	1	0	0
1713	INRA_BovSV1713	Tandem duplication	22,097	Chr10	25,510,796	25,532,894	1	1	0	0	1
1714	INRA_BovSV1714	deletion	72	Chr11	87,935,628	87,935,701	1	1	1	0	0
1715	INRA_BovSV1715	inversion	2,037	Chr2	42,693,606	42,695,644	1	1	1	0	0
1716	INRA_BovSV1716	Tandem duplication	3,112	Chr1	120,743,026	120,746,139	1	1	0	1	0
1717	INRA_BovSV1717	deletion	135	Chr4	28,356,158	28,356,294	3	5	1	2	2
1718	INRA_BovSV1718	deletion	94	Chr4	28,693,919	28,694,014	1	1	0	1	0
1719	INRA_BovSV1719	Tandem duplication	1,863	Chr1	124,103,205	124,105,069	2	3	2	0	1
1720	INRA_BovSV1720	deletion	84	Chr4	29,039,215	29,039,300	3	3	1	1	1
1721	INRA_BovSV1721	inversion	59	Chr2	43,453,558	43,453,618	1	1	0	1	0
1722	INRA_BovSV1722	deletion	84	Chr4	31,070,437	31,070,522	1	2	0	2	0
1723	INRA_BovSV1723	deletion	84	Chr4	32,872,338	32,872,423	1	1	1	0	0
1724	INRA_BovSV1724	deletion	143	Chr4	33,340,736	33,340,880	1	1	1	0	0
1725	INRA_BovSV1725	deletion	21,480	Chr4	33,561,488	33,582,969	3	3	1	1	1
1726	INRA_BovSV1726	inversion	2,011	Chr11	59,652,188	59,654,182	1	1	0	0	1
1727	INRA_BovSV1727	inversion	1,973,305	Chr2	45,639,918	47,613,224	1	1	1	0	0
1728	INRA_BovSV1728	inversion	1,459	Chr2	47,020,189	47,021,649	1	1	0	0	1
1729	INRA_BovSV1729	inversion	213,807	Chr2	47,031,712	47,245,520	1	1	0	1	0
1730	INRA_BovSV1730	inversion	1,999	Chr2	49,513,989	49,515,989	1	1	0	1	0
1731	INRA_BovSV1731	inversion	1,697	Chr2	50,277,227	50,278,921	1	1	0	0	1
1732	INRA_BovSV1732	inversion	4,574	Chr10	10,194,775	10,199,350	1	2	2	0	0
1733	INRA_BovSV1733	deletion	1,475	Chr4	37,491,899	37,493,375	3	4	1	1	2
1734	INRA_BovSV1734	inversion	1,572	Chr2	53,772,419	53,773,982	1	1	1	0	0
1735	INRA_BovSV1735	inversion	5,981	Chr2	51,169,746	51,175,728	1	1	1	0	0
1736	INRA_BovSV1736	deletion	53	Chr4	39,634,822	39,634,876	1	1	0	0	1
1737	INRA_BovSV1737	deletion	80	Chr4	41,394,983	41,395,064	2	3	2	1	0
1738	INRA_BovSV1738	deletion	2,330	Chr4	44,298,960	44,301,291	1	1	1	0	0
1739	INRA_BovSV1739	Tandem duplication	67,281	Chr1	145,316,188	145,383,470	1	1	0	1	0
1740	INRA_BovSV1740	inversion	2,422	Chr2	57,894,058	57,896,481	1	1	0	1	0
1741	INRA_BovSV1741	inversion	1,371	Chr2	60,895,908	60,897,280	1	1	1	0	0
1742	INRA_BovSV1742	inversion	16,575	Chr2	62,381,082	62,397,644	1	1	1	0	0
1743	INRA_BovSV1743	deletion	2,960	Chr4	50,502,935	50,505,896	3	12	8	1	3
1744	INRA_BovSV1744	deletion	30,651	Chr4	50,781,260	50,811,912	2	5	4	0	1
1745	INRA_BovSV1745	deletion	30,673	Chr4	50,783,332	50,814,006	2	4	2	2	0
1746	INRA_BovSV1746	Tandem duplication	28,107	Chr1	145,350,101	145,378,209	2	2	0	1	1
1747	INRA_BovSV1747	inversion	2,593	Chr11	58,174,661	58,177,255	1	1	0	1	0
1748	INRA_BovSV1748	inversion	18,410	Chr2	65,954,784	65,973,195	1	1	1	0	0
1749	INRA_BovSV1749	deletion	30,651	Chr4	50,781,270	50,811,922	1	1	1	0	0
1750	INRA_BovSV1750	inversion	883	Chr2	66,715,217	66,716,101	1	1	1	0	0
1751	INRA_BovSV1751	Tandem duplication	7,479	Chr1	145,364,152	145,371,632	1	1	0	0	1
1752	INRA_BovSV1752	deletion	144	Chr4	57,267,628	57,267,773	2	7	5	2	0
1753	INRA_BovSV1753	deletion	59,874	Chr4	58,416,432	58,476,307	2	23	16	0	7
1754	INRA_BovSV1754	deletion	59,874	Chr4	58,416,553	58,476,428	1	1	1	0	0
1755	INRA_BovSV1755	deletion	56	Chr4	58,519,397	58,519,454	1	1	1	0	0
1756	INRA_BovSV1756	deletion	52	Chr11	90,129,222	90,129,275	1	1	0	0	1
1757	INRA_BovSV1757	inversion	2,482	Chr2	66,511,779	66,514,262	1	1	0	1	0
1758	INRA_BovSV1758	deletion	1,303	Chr4	57,397,873	57,399,177	1	1	0	0	1
1759	INRA_BovSV1759	Tandem duplication	67,383	Chr1	145,368,794	145,436,178	1	1	0	0	1
1760	INRA_BovSV1760	inversion	1,202	Chr2	70,910,543	70,911,726	1	1	1	0	0
1761	INRA_BovSV1761	inversion	20,097	Chr2	74,141,598	74,161,696	1	1	1	0	0
1762	INRA_BovSV1762	inversion	13,811	Chr2	70,734,826	70,748,638	1	1	1	0	0
1763	INRA_BovSV1763	inversion	1,584	Chr2	76,560,795	76,562,380	1	1	0	1	0
1764	INRA_BovSV1764	deletion	3,228	Chr4	68,282,155	68,285,384	2	2	1	0	1
1765	INRA_BovSV1765	deletion	500	Chr4	69,856,562	69,857,063	3	6	1	4	1
1766	INRA_BovSV1766	deletion	11,776	Chr4	66,015,022	66,026,799	1	1	0	0	1
1767	INRA_BovSV1767	inversion	3,698	Chr2	78,268,395	78,272,054	1	1	1	0	0
1768	INRA_BovSV1768	deletion	9,195	Chr4	67,006,645	67,015,841	1	1	0	1	0
1769	INRA_BovSV1769	inversion	3,560	Chr2	78,758,978	78,762,533	1	1	1	0	0
1770	INRA_BovSV1770	deletion	119	Chr4	71,002,978	71,003,098	1	1	1	0	0
1771	INRA_BovSV1771	Tandem duplication	8,865	Chr10	27,575,302	27,584,168	1	2	2	0	0
1772	INRA_BovSV1772	inversion	5,942	Chr2	78,910,750	78,916,693	1	1	0	0	1
1773	INRA_BovSV1773	inversion	3,945	Chr2	81,794,323	81,798,269	1	1	0	1	0
1774	INRA_BovSV1774	inversion	1,958	Chr2	82,471,667	82,473,626	1	1	1	0	0
1775	INRA_BovSV1775	deletion	132	Chr4	77,070,665	77,070,798	1	1	0	1	0
1776	INRA_BovSV1776	deletion	93	Chr4	77,242,745	77,242,839	1	2	0	0	2
1777	INRA_BovSV1777	inversion	7,525	Chr2	83,631,005	83,638,507	2	4	0	3	1
1778	INRA_BovSV1778	deletion	83	Chr4	78,545,838	78,545,922	1	3	3	0	0
1779	INRA_BovSV1779	inversion	1,408	Chr2	84,798,195	84,799,604	1	1	1	0	0
1780	INRA_BovSV1780	inversion	8,668	Chr2	80,506,967	80,515,636	1	1	0	1	0
1781	INRA_BovSV1781	deletion	21,434	Chr4	83,331,659	83,353,094	1	1	0	0	1
1782	INRA_BovSV1782	deletion	21,435	Chr4	83,331,659	83,353,095	1	1	0	1	0
1783	INRA_BovSV1783	deletion	51,725	Chr10	133,432	185,158	3	10	5	3	2
1784	INRA_BovSV1784	deletion	122,285	Chr4	83,322,021	83,444,307	1	1	0	0	1
1785	INRA_BovSV1785	deletion	5,967	Chr4	83,328,888	83,334,856	1	1	1	0	0
1786	INRA_BovSV1786	deletion	15,525	Chr4	83,344,064	83,359,590	1	1	1	0	0
1787	INRA_BovSV1787	inversion	29,398	Chr2	88,158,470	88,187,829	1	2	2	0	0
1788	INRA_BovSV1788	deletion	18,519	Chr4	83,399,212	83,417,732	1	1	1	0	0
1789	INRA_BovSV1789	inversion	581	Chr2	88,775,262	88,775,844	1	1	1	0	0
1790	INRA_BovSV1790	deletion	54	Chr4	85,743,909	85,743,964	1	1	1	0	0
1791	INRA_BovSV1791	deletion	81	Chr4	89,543,703	89,543,785	1	1	1	0	0
1792	INRA_BovSV1792	deletion	282	Chr4	89,551,762	89,552,045	1	1	0	1	0
1793	INRA_BovSV1793	inversion	2,560	Chr2	91,762,878	91,765,439	1	2	0	0	2
1794	INRA_BovSV1794	inversion	5,849	Chr2	92,683,796	92,689,622	1	1	1	0	0
1795	INRA_BovSV1795	deletion	2,608	Chr4	89,979,115	89,981,724	1	1	1	0	0
1796	INRA_BovSV1796	inversion	3,671	Chr2	90,342,343	90,346,015	1	1	0	1	0
1797	INRA_BovSV1797	inversion	126,302	Chr2	93,107,156	93,233,459	1	1	0	0	1
1798	INRA_BovSV1798	Tandem duplication	114	Chr1	148,953,042	148,953,157	1	1	1	0	0
1799	INRA_BovSV1799	deletion	152	Chr4	94,311,065	94,311,218	2	3	2	1	0
1800	INRA_BovSV1800	inversion	1,377	Chr2	95,004,265	95,005,643	1	1	1	0	0
1801	INRA_BovSV1801	Tandem duplication	22,208	Chr10	27,653,828	27,676,037	1	1	1	0	0
1802	INRA_BovSV1802	inversion	1,873	Chr2	96,146,655	96,148,529	1	1	0	1	0
1803	INRA_BovSV1803	inversion	830	Chr2	96,937,450	96,938,281	1	1	1	0	0
1804	INRA_BovSV1804	deletion	3,880	Chr4	95,096,422	95,100,303	3	4	1	1	2
1805	INRA_BovSV1805	deletion	3,880	Chr4	95,096,552	95,100,433	3	14	7	3	4
1806	INRA_BovSV1806	deletion	6,998	Chr4	95,100,480	95,107,479	2	2	0	1	1
1807	INRA_BovSV1807	inversion	1,284	Chr2	97,165,354	97,166,639	1	1	1	0	0
1808	INRA_BovSV1808	inversion	1,327	Chr2	98,538,666	98,539,994	1	1	1	0	0
1809	INRA_BovSV1809	inversion	1,080	Chr2	98,538,790	98,539,871	1	1	1	0	0
1810	INRA_BovSV1810	inversion	13,912	Chr2	99,004,428	99,018,341	1	1	1	0	0
1811	INRA_BovSV1811	deletion	72	Chr4	98,503,727	98,503,800	1	1	0	0	1
1812	INRA_BovSV1812	inversion	1,906	Chr2	99,564,246	99,566,153	1	2	2	0	0
1813	INRA_BovSV1813	deletion	93,720	Chr4	99,785,476	99,879,197	1	1	0	0	1
1814	INRA_BovSV1814	deletion	92,563	Chr4	99,818,225	99,910,789	2	3	1	2	0
1815	INRA_BovSV1815	deletion	27,481	Chr4	99,824,297	99,851,779	2	11	7	0	4
1816	INRA_BovSV1816	deletion	66,674	Chr4	99,852,796	99,919,471	1	1	0	0	1
1817	INRA_BovSV1817	deletion	11,955	Chr4	99,866,374	99,878,330	2	3	0	1	2
1818	INRA_BovSV1818	deletion	92,572	Chr4	99,818,206	99,910,779	1	1	0	1	0
1819	INRA_BovSV1819	deletion	97,311	Chr4	99,832,210	99,929,522	1	1	0	0	1
1820	INRA_BovSV1820	deletion	3,189	Chr11	93,441,440	93,444,630	1	1	0	1	0
1821	INRA_BovSV1821	inversion	7,663	Chr2	102,524,046	102,531,710	1	1	1	0	0
1822	INRA_BovSV1822	inversion	2,362,201	Chr2	101,813,543	104,175,745	2	3	1	0	2
1823	INRA_BovSV1823	inversion	2,319	Chr2	103,260,022	103,262,340	1	2	2	0	0
1824	INRA_BovSV1824	Tandem duplication	71	Chr20	875,841	875,913	3	5	2	2	1
1825	INRA_BovSV1825	inversion	418	Chr2	104,270,798	104,271,217	1	1	1	0	0
1826	INRA_BovSV1826	inversion	2,950,487	Chr2	103,376,933	106,327,421	2	2	0	1	1
1827	INRA_BovSV1827	deletion	12,217	Chr4	106,020,536	106,032,754	1	1	1	0	0
1828	INRA_BovSV1828	deletion	15,045	Chr4	106,422,231	106,437,277	2	2	0	1	1
1829	INRA_BovSV1829	deletion	14,953	Chr4	106,423,965	106,438,919	3	10	7	1	2
1830	INRA_BovSV1830	deletion	3,922	Chr4	106,454,900	106,458,823	1	1	0	0	1
1831	INRA_BovSV1831	deletion	27,235	Chr4	106,463,989	106,491,225	1	1	0	1	0
1832	INRA_BovSV1832	deletion	48,213	Chr4	106,464,994	106,513,208	3	6	3	1	2
1833	INRA_BovSV1833	deletion	70,509	Chr4	106,471,553	106,542,063	3	8	2	3	3
1834	INRA_BovSV1834	deletion	58,395	Chr4	106,474,969	106,533,365	1	1	1	0	0
1835	INRA_BovSV1835	deletion	23,227	Chr4	106,475,907	106,499,135	2	4	2	0	2
1836	INRA_BovSV1836	deletion	54,202	Chr4	106,495,408	106,549,611	1	3	0	3	0
1837	INRA_BovSV1837	deletion	34,781	Chr4	106,500,523	106,535,305	1	2	0	2	0
1838	INRA_BovSV1838	deletion	18,253	Chr4	106,523,403	106,541,657	1	1	0	1	0
1839	INRA_BovSV1839	deletion	115,963	Chr4	106,636,597	106,752,561	1	1	1	0	0
1840	INRA_BovSV1840	deletion	86,545	Chr4	106,639,692	106,726,238	2	4	3	1	0
1841	INRA_BovSV1841	deletion	67,100	Chr4	106,650,802	106,717,903	1	1	0	1	0
1842	INRA_BovSV1842	deletion	104,626	Chr4	106,675,542	106,780,169	3	15	7	5	3
1843	INRA_BovSV1843	deletion	29,028	Chr4	106,733,170	106,762,199	1	1	1	0	0
1844	INRA_BovSV1844	deletion	3,036	Chr4	106,859,083	106,862,120	3	31	12	10	9
1845	INRA_BovSV1845	deletion	2,484	Chr4	106,861,670	106,864,155	1	1	1	0	0
1846	INRA_BovSV1846	deletion	7,432	Chr4	106,863,150	106,870,583	3	21	12	5	4
1847	INRA_BovSV1847	deletion	30,383	Chr4	108,229,547	108,259,931	1	1	1	0	0
1848	INRA_BovSV1848	deletion	53,942	Chr4	108,286,068	108,340,011	1	1	0	1	0
1849	INRA_BovSV1849	inversion	3,289	Chr2	109,343,768	109,347,058	1	1	0	1	0
1850	INRA_BovSV1850	inversion	109,906	Chr2	109,298,283	109,408,190	2	2	1	1	0
1851	INRA_BovSV1851	inversion	3,407	Chr2	108,836,302	108,839,710	1	1	0	0	1
1852	INRA_BovSV1852	deletion	15,048	Chr4	106,418,978	106,434,027	1	1	1	0	0
1853	INRA_BovSV1853	deletion	15,055	Chr4	106,422,206	106,437,262	1	1	1	0	0
1854	INRA_BovSV1854	deletion	14,944	Chr4	106,427,134	106,442,079	2	2	1	0	1
1855	INRA_BovSV1855	deletion	62,329	Chr4	106,474,825	106,537,155	1	1	1	0	0
1856	INRA_BovSV1856	deletion	34,734	Chr4	106,476,076	106,510,811	1	1	0	1	0
1857	INRA_BovSV1857	deletion	22,490	Chr4	106,509,292	106,531,783	2	2	1	0	1
1858	INRA_BovSV1858	deletion	23,312	Chr4	106,511,751	106,535,064	1	1	1	0	0
1859	INRA_BovSV1859	deletion	18,247	Chr4	106,522,531	106,540,779	1	1	1	0	0
1860	INRA_BovSV1860	deletion	151,533	Chr4	106,649,853	106,801,387	1	1	0	1	0
1861	INRA_BovSV1861	deletion	97,029	Chr4	106,658,886	106,755,916	1	1	0	0	1
1862	INRA_BovSV1862	deletion	43,470	Chr4	106,662,581	106,706,052	1	1	0	0	1
1863	INRA_BovSV1863	deletion	104,629	Chr4	106,675,858	106,780,488	1	1	1	0	0
1864	INRA_BovSV1864	deletion	59,678	Chr4	106,744,670	106,804,349	1	1	1	0	0
1865	INRA_BovSV1865	deletion	45,868	Chr4	108,331,901	108,377,770	1	1	0	0	1
1866	INRA_BovSV1866	inversion	38,327	Chr2	111,293,589	111,331,917	3	4	2	1	1
1867	INRA_BovSV1867	deletion	1,287	Chr4	109,889,919	109,891,207	1	1	1	0	0
1868	INRA_BovSV1868	Tandem duplication	292,278	Chr20	48,097,291	48,389,570	1	1	1	0	0
1869	INRA_BovSV1869	deletion	72	Chr4	112,009,365	112,009,438	1	1	1	0	0
1870	INRA_BovSV1870	deletion	59	Chr11	96,541,982	96,542,042	2	14	4	0	10
1871	INRA_BovSV1871	deletion	60	Chr11	96,541,993	96,542,054	1	1	0	0	1
1872	INRA_BovSV1872	inversion	13,427	Chr2	113,757,954	113,771,382	1	1	0	1	0
1873	INRA_BovSV1873	Tandem duplication	15,618	Chr10	39,653,063	39,668,682	3	10	5	2	3
1874	INRA_BovSV1874	deletion	2,248	Chr4	116,374,129	116,376,378	3	6	1	1	4
1875	INRA_BovSV1875	inversion	2,546	Chr2	117,066,837	117,069,348	1	1	0	0	1
1876	INRA_BovSV1876	Tandem duplication	5,376,381	Chr20	59,880,754	65,257,136	2	4	3	0	1
1877	INRA_BovSV1877	inversion	1,248	Chr2	117,138,573	117,139,822	1	1	1	0	0
1878	INRA_BovSV1878	deletion	120	Chr4	117,573,098	117,573,219	2	2	1	1	0
1879	INRA_BovSV1879	deletion	232	Chr4	117,597,840	117,598,073	3	10	4	2	4
1880	INRA_BovSV1880	deletion	67	Chr4	118,120,474	118,120,542	1	1	0	1	0
1881	INRA_BovSV1881	deletion	100	Chr4	118,176,450	118,176,551	1	1	1	0	0
1882	INRA_BovSV1882	deletion	73	Chr4	118,485,268	118,485,342	1	1	0	0	1
1883	INRA_BovSV1883	deletion	96	Chr4	119,622,112	119,622,209	1	1	1	0	0
1884	INRA_BovSV1884	deletion	24,508	Chr4	119,767,263	119,791,772	1	1	0	0	1
1885	INRA_BovSV1885	deletion	154	Chr4	119,884,499	119,884,654	1	2	0	0	2
1886	INRA_BovSV1886	Tandem duplication	78	Chr20	65,279,584	65,279,663	1	1	0	0	1
1887	INRA_BovSV1887	deletion	84	Chr11	97,551,908	97,551,993	1	1	0	0	1
1888	INRA_BovSV1888	deletion	62	Chr4	119,755,126	119,755,189	1	1	0	0	1
1889	INRA_BovSV1889	deletion	78	Chr4	120,097,207	120,097,286	2	2	1	0	1
1890	INRA_BovSV1890	deletion	63	Chr4	120,114,364	120,114,428	1	1	0	0	1
1891	INRA_BovSV1891	inversion	6,179	Chr2	120,837,353	120,843,533	1	1	1	0	0
1892	INRA_BovSV1892	deletion	1,278	Chr5	2,856	4,135	3	14	7	3	4
1893	INRA_BovSV1893	deletion	96	Chr11	98,389,993	98,390,090	1	1	0	1	0
1894	INRA_BovSV1894	inversion	1,194,093	Chr2	123,623,947	124,818,015	1	1	1	0	0
1895	INRA_BovSV1895	inversion	1,193,923	Chr2	123,624,031	124,817,949	2	2	1	1	0
1896	INRA_BovSV1896	Tandem duplication	105	Chr20	70,771,145	70,771,251	1	1	0	0	1
1897	INRA_BovSV1897	inversion	649,731	Chr2	123,701,206	124,350,938	1	1	1	0	0
1898	INRA_BovSV1898	deletion	140	Chr5	3,717,987	3,718,128	1	1	1	0	0
1899	INRA_BovSV1899	deletion	57	Chr5	4,088,058	4,088,116	1	1	1	0	0
1900	INRA_BovSV1900	deletion	71	Chr5	4,166,376	4,166,448	1	1	0	0	1
1901	INRA_BovSV1901	inversion	3,703	Chr2	127,699,777	127,703,481	1	1	0	1	0
1902	INRA_BovSV1902	inversion	2,474	Chr2	128,514,648	128,517,101	1	1	0	1	0
1903	INRA_BovSV1903	inversion	540	Chr2	129,200,128	129,200,669	1	1	1	0	0
1904	INRA_BovSV1904	deletion	19,270	Chr11	99,367,455	99,386,726	1	1	1	0	0
1905	INRA_BovSV1905	deletion	3,275	Chr5	4,314,149	4,317,425	2	3	2	0	1
1906	INRA_BovSV1906	deletion	94	Chr5	5,588,502	5,588,597	3	23	8	4	11
1907	INRA_BovSV1907	deletion	55	Chr5	6,193,670	6,193,726	1	1	0	0	1
1908	INRA_BovSV1908	deletion	869	Chr5	7,979,284	7,980,154	1	1	0	0	1
1909	INRA_BovSV1909	deletion	62	Chr5	8,943,473	8,943,536	1	1	0	0	1
1910	INRA_BovSV1910	inversion	28,015	Chr2	131,422,278	131,450,294	1	1	0	0	1
1911	INRA_BovSV1911	inversion	25,443	Chr2	133,300,192	133,325,636	1	1	0	1	0
1912	INRA_BovSV1912	inversion	4,955	Chr11	66,552,686	66,557,640	1	1	1	0	0
1913	INRA_BovSV1913	inversion	4,437	Chr2	136,068,552	136,072,990	1	1	0	0	1
1914	INRA_BovSV1914	deletion	807	Chr5	11,290,067	11,290,875	1	1	0	1	0
1915	INRA_BovSV1915	inversion	156,609	Chr3	34,484	191,094	1	1	0	0	1
1916	INRA_BovSV1916	inversion	4,310	Chr3	372,356	376,667	1	1	1	0	0
1917	INRA_BovSV1917	deletion	2,732	Chr5	13,081,388	13,084,121	3	12	4	2	6
1918	INRA_BovSV1918	deletion	1,049	Chr5	13,379,237	13,380,287	3	10	5	3	2
1919	INRA_BovSV1919	inversion	15,138	Chr3	2,647,518	2,662,657	1	1	1	0	0
1920	INRA_BovSV1920	inversion	10,123	Chr3	2,743,340	2,753,438	1	1	0	0	1
1921	INRA_BovSV1921	deletion	11,740	Chr11	99,343,482	99,355,223	2	3	2	1	0
1922	INRA_BovSV1922	Tandem duplication	55	Chr21	2,763,235	2,763,291	1	1	0	1	0
1923	INRA_BovSV1923	inversion	615	Chr3	3,206,059	3,206,675	1	1	0	1	0
1924	INRA_BovSV1924	inversion	26,315	Chr3	4,562,892	4,589,168	1	1	0	0	1
1925	INRA_BovSV1925	inversion	7,480	Chr3	1,030,240	1,037,721	1	1	0	0	1
1926	INRA_BovSV1926	inversion	1,679	Chr3	1,162,853	1,164,533	1	1	1	0	0
1927	INRA_BovSV1927	inversion	1,955	Chr3	1,690,500	1,692,456	1	1	1	0	0
1928	INRA_BovSV1928	Tandem duplication	5,505	Chr21	10,446,249	10,451,755	1	1	0	1	0
1929	INRA_BovSV1929	deletion	54	Chr5	16,453,090	16,453,145	1	1	0	1	0
1930	INRA_BovSV1930	inversion	14,083	Chr3	5,071,645	5,085,729	1	1	0	1	0
1931	INRA_BovSV1931	deletion	6,152	Chr5	17,626,684	17,632,837	1	1	0	0	1
1932	INRA_BovSV1932	deletion	52	Chr5	17,675,864	17,675,917	2	3	2	0	1
1933	INRA_BovSV1933	inversion	59,888	Chr3	6,367,972	6,427,861	1	1	0	1	0
1934	INRA_BovSV1934	inversion	14,285	Chr3	7,135,703	7,149,989	1	1	1	0	0
1935	INRA_BovSV1935	inversion	1,633	Chr11	68,465,249	68,466,883	2	2	0	1	1
1936	INRA_BovSV1936	inversion	18,677	Chr3	8,095,866	8,114,544	1	1	1	0	0
1937	INRA_BovSV1937	inversion	6,548	Chr3	8,131,808	8,138,349	1	1	1	0	0
1938	INRA_BovSV1938	deletion	3,123	Chr11	101,051,682	101,054,806	1	1	1	0	0
1939	INRA_BovSV1939	inversion	4,042	Chr3	7,855,663	7,859,706	1	1	1	0	0
1940	INRA_BovSV1940	inversion	2,661	Chr3	7,919,508	7,922,170	1	1	0	0	1
1941	INRA_BovSV1941	inversion	3,149	Chr11	69,351,455	69,354,605	2	2	1	0	1
1942	INRA_BovSV1942	Tandem duplication	109,371	Chr21	20,066,421	20,175,793	1	1	0	0	1
1943	INRA_BovSV1943	inversion	2,043	Chr3	10,985,959	10,988,003	1	1	0	0	1
1944	INRA_BovSV1944	deletion	283	Chr5	26,533,713	26,533,997	3	10	4	2	4
1945	INRA_BovSV1945	inversion	1,863	Chr3	13,052,262	13,054,126	1	1	1	0	0
1946	INRA_BovSV1946	Tandem duplication	592,481	Chr21	20,078,661	20,671,143	1	1	0	0	1
1947	INRA_BovSV1947	inversion	29,761	Chr3	11,389,950	11,419,712	1	1	1	0	0
1948	INRA_BovSV1948	deletion	86	Chr11	102,955,977	102,956,064	1	2	0	0	2
1949	INRA_BovSV1949	deletion	84	Chr11	102,955,979	102,956,064	1	2	0	2	0
1950	INRA_BovSV1950	inversion	91,790	Chr3	13,426,397	13,518,188	1	1	1	0	0
1951	INRA_BovSV1951	deletion	9,243	Chr5	32,117,190	32,126,434	1	1	0	1	0
1952	INRA_BovSV1952	deletion	128,995	Chr5	33,741,715	33,870,711	3	7	2	1	4
1953	INRA_BovSV1953	deletion	297	Chr5	34,621,756	34,622,054	2	3	2	1	0
1954	INRA_BovSV1954	inversion	4,775	Chr3	16,997,706	17,002,468	1	1	1	0	0
1955	INRA_BovSV1955	inversion	28,988	Chr11	65,775,394	65,804,383	1	1	1	0	0
1956	INRA_BovSV1956	Tandem duplication	539,998	Chr21	20,085,990	20,625,989	1	1	0	0	1
1957	INRA_BovSV1957	deletion	127,160	Chr5	32,781,568	32,908,729	2	2	1	1	0
1958	INRA_BovSV1958	inversion	17,896	Chr3	17,545,882	17,563,741	2	2	1	1	0
1959	INRA_BovSV1959	inversion	6,883	Chr3	17,915,439	17,922,323	1	1	1	0	0
1960	INRA_BovSV1960	inversion	1,516	Chr3	18,339,558	18,341,041	1	1	0	1	0
1961	INRA_BovSV1961	deletion	119	Chr5	38,105,670	38,105,790	1	1	0	0	1
1962	INRA_BovSV1962	inversion	10,299	Chr3	15,282,289	15,292,589	1	1	0	1	0
1963	INRA_BovSV1963	deletion	152	Chr5	38,597,325	38,597,478	3	9	3	3	3
1964	INRA_BovSV1964	deletion	6,156	Chr5	38,932,346	38,938,503	2	9	6	3	0
1965	INRA_BovSV1965	inversion	81,097	Chr3	17,400,258	17,481,356	1	4	4	0	0
1966	INRA_BovSV1966	inversion	1,758	Chr3	17,438,861	17,440,620	1	1	0	1	0
1967	INRA_BovSV1967	inversion	12,045	Chr3	17,819,567	17,831,613	1	1	1	0	0
1968	INRA_BovSV1968	inversion	6,701	Chr3	18,206,427	18,213,129	2	2	1	0	1
1969	INRA_BovSV1969	deletion	308	Chr5	40,593,457	40,593,766	1	1	1	0	0
1970	INRA_BovSV1970	Tandem duplication	20,541	Chr21	20,158,273	20,178,815	1	1	1	0	0
1971	INRA_BovSV1971	deletion	22,168	Chr5	44,417,667	44,439,836	1	4	4	0	0
1972	INRA_BovSV1972	deletion	22,128	Chr5	44,423,136	44,445,265	1	1	0	0	1
1973	INRA_BovSV1973	deletion	33,187	Chr5	44,428,423	44,461,611	3	11	7	2	2
1974	INRA_BovSV1974	deletion	112,701	Chr5	44,432,145	44,544,847	1	1	0	0	1
1975	INRA_BovSV1975	deletion	58,393	Chr5	44,434,027	44,492,421	1	1	1	0	0
1976	INRA_BovSV1976	deletion	44,535	Chr5	44,435,209	44,479,745	1	1	0	0	1
1977	INRA_BovSV1977	deletion	90,164	Chr5	44,438,995	44,529,160	1	1	0	0	1
1978	INRA_BovSV1978	deletion	90,650	Chr5	44,448,601	44,539,252	1	2	0	2	0
1979	INRA_BovSV1979	deletion	15,818	Chr5	44,507,501	44,523,320	1	2	2	0	0
1980	INRA_BovSV1980	deletion	15,820	Chr5	44,507,898	44,523,719	3	5	1	1	3
1981	INRA_BovSV1981	inversion	270,820	Chr3	21,035,714	21,306,533	1	1	0	0	1
1982	INRA_BovSV1982	inversion	2,377	Chr3	22,678,028	22,680,400	1	1	1	0	0
1983	INRA_BovSV1983	deletion	168	Chr5	42,816,618	42,816,787	1	1	0	0	1
1984	INRA_BovSV1984	deletion	22,400	Chr5	44,420,797	44,443,198	1	1	0	1	0
1985	INRA_BovSV1985	deletion	22,129	Chr5	44,423,137	44,445,267	1	2	0	2	0
1986	INRA_BovSV1986	deletion	43,455	Chr5	44,432,010	44,475,466	1	1	0	0	1
1987	INRA_BovSV1987	deletion	299	Chr5	44,507,938	44,508,238	2	2	1	0	1
1988	INRA_BovSV1988	inversion	215,537	Chr3	21,021,414	21,236,952	1	1	1	0	0
1989	INRA_BovSV1989	inversion	270,763	Chr3	21,035,742	21,306,506	1	2	0	0	2
1990	INRA_BovSV1990	inversion	278,279	Chr3	21,033,781	21,312,061	1	1	0	0	1
1991	INRA_BovSV1991	deletion	219	Chr5	47,800,939	47,801,159	3	41	18	8	15
1992	INRA_BovSV1992	inversion	4,078	Chr3	21,723,799	21,727,878	1	1	0	1	0
1993	INRA_BovSV1993	inversion	111,401	Chr3	22,779,666	22,891,068	1	2	2	0	0
1994	INRA_BovSV1994	Tandem duplication	1,447,363	Chr21	26,362,975	27,810,339	1	1	0	0	1
1995	INRA_BovSV1995	Tandem duplication	1,294	Chr10	55,921,349	55,922,644	1	1	1	0	0
1996	INRA_BovSV1996	deletion	76	Chr5	52,253,150	52,253,227	2	3	2	0	1
1997	INRA_BovSV1997	inversion	6,770,931	Chr3	18,583,405	25,354,337	1	2	2	0	0
1998	INRA_BovSV1998	inversion	1,440	Chr3	32,508,124	32,509,565	1	1	1	0	0
[truncated: 4,428 more rows]
